# Supplementary material for: The Plasmodium berghei RC strain is highly diverged and harbors putatively novel drug resistance variants
Source: PeerJ. 2017 Oct 5;5:e3766. doi: 10.7717/peerj.3766 (PMC5632537; doi:10.7717/peerj.3766)
Supplement: Supplemental Information 2 [file peerj-05-3766-s002.xlsx]

## Sheet: Sheet1
Gene ID	Gene Name or Symbol	Tajima's D	Product Description	Genomic Location (Gene)
PBANKA_1037600	RRP5	2.38579	rRNA biogenesis protein RRP5, putative	PbANKA_10_v3:1,520,313..1,521,611(-)
PBANKA_1039000	null	2.13178	conserved Plasmodium protein, unknown function	PbANKA_10_v3:1,561,023..1,563,497(-)
PBANKA_1037700	null	2.12303	mitochondrial ribosomal protein L16 precursor, putative	PbANKA_10_v3:1,522,511..1,523,062(-)
PBANKA_0913800	RPA2	1.92291	DNA-directed RNA polymerase I subunit RPA2, putative	PbANKA_09_v3:520,115..524,627(+)
PBANKA_1039100	null	1.89122	conserved Plasmodium protein, unknown function	PbANKA_10_v3:1,564,424..1,566,778(-)
PBANKA_1037400	null	1.89122	conserved Plasmodium protein, unknown function	PbANKA_10_v3:1,512,423..1,513,349(+)
PBANKA_0104700	null	1.89122	long chain polyunsaturated fatty acid elongation enzyme, putative	PbANKA_01_v3:196,519..198,072(+)
PBANKA_1037500	ACalpha	1.85363	adenylyl cyclase alpha	PbANKA_10_v3:1,514,226..1,520,023(+)
PBANKA_0412900	CTRP	1.64575	circumsporozoite- and TRAP-related protein	PbANKA_04_v3:462,132..467,849(+)
PBANKA_1312800	null	1.63255	conserved Plasmodium protein, unknown function	PbANKA_13_v3:550,724..554,302(+)
PBANKA_1435900	UIS27	1.62381	conserved Plasmodium protein, unknown function	PbANKA_14_v3:1,350,312..1,353,673(-)
PBANKA_1132100	SF3B5	1.62381	splicing factor 3B subunit 5, putative	PbANKA_11_v3:1,206,848..1,207,526(+)
PBANKA_1038600	null	1.62381	conserved Plasmodium protein, unknown function	PbANKA_10_v3:1,543,677..1,547,446(-)
PBANKA_1038700	null	1.52266	conserved Plasmodium protein, unknown function	PbANKA_10_v3:1,547,909..1,551,970(+)
PBANKA_1458700	null	1.48617	conserved Plasmodium protein, unknown function	PbANKA_14_v3:2,246,055..2,249,049(+)
PBANKA_1458100	null	1.48617	conserved Plasmodium protein, unknown function	PbANKA_14_v3:2,227,994..2,231,123(+)
PBANKA_1450200	SHMT	1.48617	serine hydroxymethyltransferase, putative	PbANKA_14_v3:1,941,751..1,943,388(+)
PBANKA_1450100	null	1.48617	mRNA methyltransferase, putative	PbANKA_14_v3:1,938,506..1,940,488(+)
PBANKA_1434000	null	1.48617	phosphate translocator, putative	PbANKA_14_v3:1,267,698..1,270,350(-)
PBANKA_1413400	P44	1.48617	general transcription factor IIH subunit 2, putative	PbANKA_14_v3:553,284..554,994(+)
PBANKA_1410000	RPT1	1.48617	26S protease regulatory subunit 7, putative	PbANKA_14_v3:426,704..428,276(-)
PBANKA_1407200	null	1.48617	conserved Plasmodium protein, unknown function	PbANKA_14_v3:341,090..342,250(+)
PBANKA_1364300	null	1.48617	glycerol kinase, putative	PbANKA_13_v3:2,438,324..2,439,829(+)
PBANKA_1323100	null	1.48617	conserved Plasmodium protein, unknown function	PbANKA_13_v3:943,754..946,624(+)
PBANKA_1322300	null	1.48617	conserved Plasmodium protein, unknown function	PbANKA_13_v3:919,576..923,439(+)
PBANKA_1312500	null	1.48617	Appr-1-p processing domain protein	PbANKA_13_v3:543,647..544,722(-)
PBANKA_1302300	null	1.48617	metacaspase-like protein	PbANKA_13_v3:142,573..149,070(+)
PBANKA_1232000	null	1.48617	conserved Plasmodium protein, unknown function	PbANKA_12_v3:1,238,525..1,240,438(-)
PBANKA_1231500	null	1.48617	ubiquitin carboxyl-terminal hydrolase 2, putative	PbANKA_12_v3:1,215,559..1,219,461(+)
PBANKA_1231000	RPS11	1.48617	40S ribosomal protein S11, putative	PbANKA_12_v3:1,200,699..1,201,422(-)
PBANKA_1229800	FABI	1.48617	enoyl-acyl carrier reductase	PbANKA_12_v3:1,152,375..1,153,565(-)
PBANKA_1225700	null	1.48617	GTPase-activating protein, putative	PbANKA_12_v3:974,532..975,836(+)
PBANKA_1221700	null	1.48617	conserved Plasmodium protein, unknown function	PbANKA_12_v3:832,421..832,939(-)
PBANKA_1212300	null	1.48617	translation initiation factor eIF-2B subunit delta, putative	PbANKA_12_v3:462,389..465,499(-)
PBANKA_1208900	null	1.48617	ankyrin-repeat protein, putative	PbANKA_12_v3:346,646..348,261(+)
PBANKA_1201500	null	1.48617	conserved Plasmodium protein, unknown function	PbANKA_12_v3:90,776..91,470(+)
PBANKA_1119300	null	1.48617	conserved Plasmodium protein, unknown function	PbANKA_11_v3:729,978..730,498(+)
PBANKA_1118000	null	1.48617	conserved Plasmodium protein, unknown function	PbANKA_11_v3:670,102..673,312(-)
PBANKA_1036100	null	1.48617	conserved Plasmodium protein, unknown function	PbANKA_10_v3:1,467,845..1,471,243(+)
PBANKA_0914200	null	1.48617	conserved Plasmodium protein, unknown function	PbANKA_09_v3:541,415..546,949(-)
PBANKA_0913600	null	1.48617	conserved Plasmodium protein, unknown function	PbANKA_09_v3:514,313..516,175(-)
PBANKA_0907600	PIGH	1.48617	phosphatidylinositol N-acetylglucosaminyltransferase subunit H, putative	PbANKA_09_v3:252,285..253,633(-)
PBANKA_0905500	null	1.48617	conserved Plasmodium protein, unknown function	PbANKA_09_v3:183,645..186,289(+)
PBANKA_0813900	RPN8	1.48617	26S proteasome regulatory subunit RPN8, putative	PbANKA_08_v3:602,160..603,273(+)
PBANKA_0810800	null	1.48617	conserved Plasmodium protein, unknown function	PbANKA_08_v3:484,817..486,846(-)
PBANKA_0805700	HSP90	1.48617	heat shock protein 90, putative	PbANKA_08_v3:279,866..283,023(+)
PBANKA_0712600	14-3-3I	1.48617	14-3-3 protein	PbANKA_07_v3:480,414..481,905(-)
PBANKA_0622300	null	1.48617	kelch domain-containing protein, putative	PbANKA_06_v3:893,514..895,038(-)
PBANKA_0505700	ROK1	1.48617	ATP-dependent RNA helicase ROK1, putative	PbANKA_05_v3:219,941..221,770(-)
PBANKA_0208100	null	1.48617	RAP protein, putative	PbANKA_02_v3:280,842..282,512(+)
PBANKA_1417500	null	1.3564	conserved Plasmodium protein, unknown function	PbANKA_14_v3:695,304..697,253(+)
PBANKA_1321700	BP1	1.3564	berghepain-1	PbANKA_13_v3:902,142..903,701(+)
PBANKA_1038800	null	1.3564	conserved Plasmodium protein, unknown function	PbANKA_10_v3:1,553,029..1,553,661(+)
PBANKA_0814900	RRSapi	1.3564	arginine--tRNA ligase, putative	PbANKA_08_v3:626,726..629,589(-)
PBANKA_0207600	null	1.3107	asparagine-rich antigen, putative	PbANKA_02_v3:260,565..267,122(-)
PBANKA_0818400	null	1.30631	conserved Plasmodium protein, unknown function	PbANKA_08_v3:738,153..742,577(+)
PBANKA_1038500	null	1.14977	dynein light chain, putative	PbANKA_10_v3:1,541,612..1,543,555(+)
PBANKA_0105300	null	1.14977	conserved Plasmodium protein, unknown function	PbANKA_01_v3:216,483..221,962(-)
PBANKA_1321600	null	1.12242	conserved Plasmodium protein, unknown function	PbANKA_13_v3:890,462..900,487(+)
PBANKA_1128600	null	1.12242	cullin-like protein, putative	PbANKA_11_v3:1,084,628..1,088,004(-)
PBANKA_1037800	SOAP	1.12242	secreted ookinete adhesive protein	PbANKA_10_v3:1,524,122..1,524,622(-)
PBANKA_1453000	null	1.06589	conserved Plasmodium protein, unknown function	PbANKA_14_v3:2,034,301..2,037,945(+)
PBANKA_1452100	null	1.06589	conserved Plasmodium protein, unknown function	PbANKA_14_v3:2,006,688..2,011,247(-)
PBANKA_1445500	null	1.06589	pre-mRNA-splicing regulator, putative	PbANKA_14_v3:1,743,456..1,745,286(+)
PBANKA_1429800	null	1.06589	conserved Plasmodium protein, unknown function	PbANKA_14_v3:1,153,036..1,153,638(-)
PBANKA_1421400	MYCBP	1.06589	C-Myc-binding protein, putative	PbANKA_14_v3:850,700..851,249(-)
PBANKA_1421000	null	1.06589	calmodulin, putative	PbANKA_14_v3:840,366..841,457(-)
PBANKA_1419000	null	1.06589	conserved Plasmodium protein, unknown function	PbANKA_14_v3:750,279..754,301(+)
PBANKA_1418600	null	1.06589	conserved Plasmodium protein, unknown function	PbANKA_14_v3:739,546..741,789(-)
PBANKA_1405100	null	1.06589	V-type proton ATPase subunit H, putative	PbANKA_14_v3:262,325..264,140(-)
PBANKA_1362200	null	1.06589	cytidine and deoxycytidylate deaminase, putative	PbANKA_13_v3:2,375,809..2,377,210(+)
PBANKA_1362000	null	1.06589	glutamate--tRNA ligase, putative	PbANKA_13_v3:2,365,520..2,367,931(-)
PBANKA_1357700	ATCase	1.06589	aspartate carbamoyltransferase, putative	PbANKA_13_v3:2,200,701..2,202,043(+)
PBANKA_1322800	null	1.06589	GTP-binding protein, putative	PbANKA_13_v3:936,200..938,722(+)
PBANKA_1322500	null	1.06589	DNA-directed RNA polymerase III subunit RPC5, putative	PbANKA_13_v3:926,706..928,925(-)
PBANKA_1320400	null	1.06589	conserved Plasmodium protein, unknown function	PbANKA_13_v3:841,607..843,691(-)
PBANKA_1319600	null	1.06589	polyprenol reductase, putative	PbANKA_13_v3:812,086..814,062(-)
PBANKA_1316000	null	1.06589	degradation in the ER (DER1) like protein, putative	PbANKA_13_v3:675,081..676,142(-)
PBANKA_1312100	null	1.06589	conserved Plasmodium protein, unknown function	PbANKA_13_v3:530,714..534,526(-)
PBANKA_1308500	null	1.06589	shikimate dehydrogenase, putative	PbANKA_13_v3:413,990..414,967(+)
PBANKA_1305600	ATP23	1.06589	mitochondrial inner membrane protease ATP23, putative	PbANKA_13_v3:286,093..287,448(+)
PBANKA_1234900	PPM9	1.06589	protein phosphatase PPM9	PbANKA_12_v3:1,339,027..1,341,663(+)
PBANKA_1233500	PUF1	1.06589	mRNA-binding protein PUF1	PbANKA_12_v3:1,288,971..1,293,061(-)
PBANKA_1233300	DDX23	1.06589	ATP-dependent RNA helicase DDX23, putative	PbANKA_12_v3:1,278,097..1,280,913(-)
PBANKA_1230300	null	1.06589	conserved Plasmodium protein, unknown function	PbANKA_12_v3:1,175,586..1,183,020(-)
PBANKA_1227600	ACbeta	1.06589	adenylyl cyclase beta, putative	PbANKA_12_v3:1,052,385..1,058,007(-)
PBANKA_1227100	UTP14	1.06589	U3 small nucleolar RNA-associated protein 14, putative	PbANKA_12_v3:1,040,142..1,042,721(+)
PBANKA_1223500	DHH1	1.06589	ATP-dependent RNA helicase DHH1, putative	PbANKA_12_v3:888,801..892,274(+)
PBANKA_1222700	null	1.06589	conserved Plasmodium protein, unknown function	PbANKA_12_v3:862,877..866,440(-)
PBANKA_1207600	null	1.06589	conserved Plasmodium protein, unknown function	PbANKA_12_v3:301,026..302,792(-)
PBANKA_1137800	GAC	1.06589	glideosome-associated connector	PbANKA_11_v3:1,426,696..1,434,816(+)
PBANKA_1132800	null	1.06589	conserved Plasmodium protein, unknown function	PbANKA_11_v3:1,230,128..1,230,845(+)
PBANKA_1129600	null	1.06589	conserved Plasmodium protein, unknown function	PbANKA_11_v3:1,125,338..1,127,829(+)
PBANKA_1119800	null	1.06589	conserved Plasmodium protein, unknown function	PbANKA_11_v3:741,551..742,192(+)
PBANKA_1115500	NIF2	1.06589	NLI interacting factor-like phosphatase	PbANKA_11_v3:593,925..594,911(-)
PBANKA_1115300	GAP40	1.06589	glideosome-associated protein 40, putative	PbANKA_11_v3:588,338..589,714(-)
PBANKA_1113600	null	1.06589	conserved Plasmodium protein, unknown function	PbANKA_11_v3:526,879..527,750(+)
PBANKA_1107200	CAF40	1.06589	cell differentiation protein, putative	PbANKA_11_v3:280,818..282,851(+)
PBANKA_1035200	CCp3	1.06589	LCCL domain-containing protein	PbANKA_10_v3:1,429,866..1,433,780(-)
PBANKA_1008000	null	1.06589	conserved Plasmodium protein, unknown function	PbANKA_10_v3:371,839..373,168(+)
PBANKA_0917100	null	1.06589	conserved Plasmodium protein, unknown function	PbANKA_09_v3:646,946..648,832(+)
PBANKA_0916800	null	1.06589	conserved Plasmodium protein, unknown function	PbANKA_09_v3:636,875..641,537(+)
PBANKA_0916000	null	1.06589	conserved Plasmodium protein, unknown function	PbANKA_09_v3:603,855..607,196(+)
PBANKA_0909600	ApiAP2	1.06589	AP2 domain transcription factor, putative	PbANKA_09_v3:340,404..347,484(+)
PBANKA_0833500	null	1.06589	conserved Plasmodium protein, unknown function	PbANKA_08_v3:1,257,271..1,260,135(-)
PBANKA_0831300	CYP72	1.06589	peptidyl-prolyl cis-trans isomerase, putative	PbANKA_08_v3:1,185,960..1,188,370(-)
PBANKA_0818500	null	1.06589	conserved Plasmodium protein, unknown function	PbANKA_08_v3:744,142..746,139(+)
PBANKA_0802900	null	1.06589	conserved Plasmodium protein, unknown function	PbANKA_08_v3:164,008..168,201(+)
PBANKA_0716000	SMC3	1.06589	structural maintenance of chromosomes protein 3, putative	PbANKA_07_v3:585,977..591,864(-)
PBANKA_0711700	null	1.06589	BRIX domain, putative	PbANKA_07_v3:447,602..448,621(-)
PBANKA_0710500	null	1.06589	conserved Plasmodium protein, unknown function	PbANKA_07_v3:402,461..404,161(-)
PBANKA_0613500	null	1.06589	conserved Plasmodium protein, unknown function	PbANKA_06_v3:581,868..582,971(-)
PBANKA_0613400	null	1.06589	mitochondrial ribosomal protein S12 precursor, putative	PbANKA_06_v3:580,246..581,271(-)
PBANKA_0602700	NAPL	1.06589	nucleosome assembly protein, putative	PbANKA_06_v3:172,167..173,845(-)
PBANKA_0413600	null	1.06589	zinc finger protein, putative	PbANKA_04_v3:488,282..489,079(-)
PBANKA_0412600	null	1.06589	conserved Plasmodium protein, unknown function	PbANKA_04_v3:454,202..455,656(+)
PBANKA_0411400	null	1.06589	conserved Plasmodium protein, unknown function	PbANKA_04_v3:407,473..410,933(-)
PBANKA_0405800	null	1.06589	conserved protein, unknown function	PbANKA_04_v3:204,664..206,416(-)
PBANKA_0405200	CCT2	1.06589	T-complex protein 1 subunit beta, putative	PbANKA_04_v3:188,892..190,669(-)
PBANKA_0205500	null	1.06589	conserved Plasmodium protein, unknown function	PbANKA_02_v3:186,553..187,332(+)
PBANKA_0108100	null	1.06589	conserved Plasmodium protein, unknown function	PbANKA_01_v3:330,792..335,330(+)
PBANKA_0411300	null	1.03644	conserved Plasmodium protein, unknown function	PbANKA_04_v3:404,531..407,187(-)
PBANKA_1317300	null	0.922292	RAP protein, putative	PbANKA_13_v3:727,500..732,630(-)
PBANKA_1138900	null	0.922292	conserved Plasmodium protein, unknown function	PbANKA_11_v3:1,476,741..1,481,483(+)
PBANKA_1038200	MISFIT	0.922292	nuclear formin-like protein MISFIT	PbANKA_10_v3:1,532,517..1,537,402(+)
PBANKA_0815100	null	0.901504	conserved Plasmodium protein, unknown function	PbANKA_08_v3:632,861..636,037(-)
PBANKA_1463000	G377	0.821586	osmiophilic body protein G377	PbANKA_14_v3:2,376,127..2,383,947(-)
PBANKA_1443300	null	0.821586	merozoite surface protein 9, putative	PbANKA_14_v3:1,651,294..1,653,150(-)
PBANKA_1319500	CCP2	0.821586	LCCL domain-containing protein	PbANKA_13_v3:806,458..811,608(+)
PBANKA_1314400	null	0.821586	conserved Plasmodium protein, unknown function	PbANKA_13_v3:612,239..614,569(+)
PBANKA_1308000	null	0.821586	conserved Plasmodium protein, unknown function	PbANKA_13_v3:377,305..399,741(-)
PBANKA_1225500	null	0.821586	conserved Plasmodium protein, unknown function	PbANKA_12_v3:968,031..969,674(-)
PBANKA_1213200	null	0.821586	conserved Plasmodium protein, unknown function	PbANKA_12_v3:507,462..511,572(-)
PBANKA_1206600	null	0.821586	26S protease regulatory subunit 4, putative	PbANKA_12_v3:270,333..272,061(-)
PBANKA_1205500	null	0.821586	RING zinc finger protein, putative	PbANKA_12_v3:220,528..222,524(+)
PBANKA_1204600	null	0.821586	conserved Plasmodium protein, unknown function	PbANKA_12_v3:197,274..199,838(-)
PBANKA_1203000	null	0.821586	conserved Plasmodium protein, unknown function	PbANKA_12_v3:152,779..154,086(-)
PBANKA_1110300	null	0.821586	WD repeat-containing protein, putative	PbANKA_11_v3:409,972..413,111(+)
PBANKA_1109000	null	0.821586	RNA polymerase I, putative	PbANKA_11_v3:349,481..357,436(-)
PBANKA_1104700	TRS85	0.821586	trafficking protein particle complex subunit 8, putative	PbANKA_11_v3:199,745..206,527(+)
PBANKA_0908300	null	0.821586	conserved Plasmodium protein, unknown function	PbANKA_09_v3:283,521..289,379(+)
PBANKA_0908000	null	0.821586	conserved Plasmodium protein, unknown function	PbANKA_09_v3:268,131..270,551(-)
PBANKA_0819100	null	0.821586	cytochrome b5, putative	PbANKA_08_v3:763,310..764,601(+)
PBANKA_0802500	null	0.821586	conserved Plasmodium protein, unknown function	PbANKA_08_v3:148,565..151,987(-)
PBANKA_0718900	null	0.821586	conserved Plasmodium protein, unknown function	PbANKA_07_v3:673,237..678,938(-)
PBANKA_0714200	ClpB1	0.821586	chaperone protein ClpB1, putative	PbANKA_07_v3:536,960..540,094(+)
PBANKA_0617200	RPS10	0.821586	40S ribosomal protein S10, putative	PbANKA_06_v3:728,781..729,697(+)
PBANKA_0613200	null	0.821586	DNA polymerase alpha catalytic subunit A, putative	PbANKA_06_v3:569,753..575,560(-)
PBANKA_0605400	null	0.821586	conserved Plasmodium protein, unknown function	PbANKA_06_v3:274,508..276,541(+)
PBANKA_0406900	null	0.821586	conserved Plasmodium protein, unknown function	PbANKA_04_v3:252,482..254,165(+)
PBANKA_0406400	null	0.821586	zinc finger protein, putative	PbANKA_04_v3:234,708..239,279(+)
PBANKA_0405500	null	0.821586	60S ribosomal protein L7, putative	PbANKA_04_v3:196,983..198,204(-)
PBANKA_0109100	TK	0.821586	transketolase, putative	PbANKA_01_v3:367,720..369,732(+)
PBANKA_0108400	null	0.821586	conserved Plasmodium protein, unknown function	PbANKA_01_v3:347,207..352,450(+)
PBANKA_0101200	EF-G	0.821586	elongation factor G, putative	PbANKA_01_v3:65,221..68,380(-)
PBANKA_1450000	null	0.667001	tetQ family GTPase, putative	PbANKA_14_v3:1,934,271..1,937,237(-)
PBANKA_1319400	null	0.667001	conserved Plasmodium protein, unknown function	PbANKA_13_v3:800,459..803,563(-)
PBANKA_1038900	CND1	0.667001	condensin complex subunit 1, putative	PbANKA_10_v3:1,554,996..1,560,380(+)
PBANKA_1014900	null	0.667001	coatomer subunit beta, putative	PbANKA_10_v3:654,009..657,996(-)
PBANKA_0827700	null	0.667001	replication termination factor, putative	PbANKA_08_v3:1,076,506..1,077,371(-)
PBANKA_0812800	null	0.667001	GTP-binding protein, putative	PbANKA_08_v3:571,039..573,873(+)
PBANKA_0609100	null	0.667001	conserved Plasmodium protein, unknown function	PbANKA_06_v3:416,829..420,338(-)
PBANKA_0413000	null	0.667001	conserved Plasmodium protein, unknown function	PbANKA_04_v3:468,932..475,693(+)
PBANKA_1361200	null	0.631634	conserved Plasmodium protein, unknown function	PbANKA_13_v3:2,331,253..2,341,995(-)
PBANKA_1208600	null	0.631634	DNA2/NAM7 helicase, putative	PbANKA_12_v3:336,056..340,855(-)
PBANKA_0407400	ARK2	0.606936	serine/threonine protein kinase, putative	PbANKA_04_v3:265,656..271,056(-)
PBANKA_1444100	CCT3	0.554178	T-complex protein 1 subunit gamma, putative	PbANKA_14_v3:1,695,399..1,697,112(+)
PBANKA_1329000	null	0.554178	conserved Plasmodium protein, unknown function	PbANKA_13_v3:1,155,693..1,158,313(-)
PBANKA_1319000	null	0.554178	conserved Plasmodium protein, unknown function	PbANKA_13_v3:782,173..784,281(+)
PBANKA_1318100	APP	0.554178	aminopeptidase P, putative	PbANKA_13_v3:758,373..760,703(+)
PBANKA_1318000	KIN	0.554178	serine/threonine protein kinase KIN, putative	PbANKA_13_v3:753,714..756,602(+)
PBANKA_1309400	null	0.554178	RNA-binding protein, putative	PbANKA_13_v3:440,067..442,156(+)
PBANKA_1235300	null	0.554178	bis(5'-nucleosyl)-tetraphosphatase [asymmetrical], putative	PbANKA_12_v3:1,348,202..1,349,354(-)
PBANKA_1228800	null	0.554178	protein kinase, putative	PbANKA_12_v3:1,122,024..1,124,363(+)
PBANKA_1134300	null	0.554178	patatin-like phospholipase, putative	PbANKA_11_v3:1,283,554..1,290,029(-)
PBANKA_1111300	CGI121	0.554178	EKC/KEOPS complex subunit CGI121, putative	PbANKA_11_v3:465,190..466,103(+)
PBANKA_1039300	SR140	0.554178	U2 snRNP-associated SURP motif-containing protein, putative	PbANKA_10_v3:1,570,946..1,574,202(+)
PBANKA_1004500	null	0.554178	conserved Plasmodium protein, unknown function	PbANKA_10_v3:246,898..255,237(-)
PBANKA_0825400	null	0.554178	conserved Plasmodium protein, unknown function	PbANKA_08_v3:983,061..986,901(-)
PBANKA_0820100	null	0.554178	PPPDE peptidase, putative	PbANKA_08_v3:801,997..802,857(-)
PBANKA_0819000	GAP50	0.554178	glideosome-associated protein 50, putative	PbANKA_08_v3:759,414..760,601(-)
PBANKA_0818800	null	0.554178	conserved Plasmodium protein, unknown function	PbANKA_08_v3:752,120..753,445(+)
PBANKA_0818600	PRP43	0.554178	pre-mRNA-splicing factor ATP-dependent RNA helicase PRP43, putative	PbANKA_08_v3:746,509..748,857(-)
PBANKA_0803200	null	0.554178	inositol-phosphate phosphatase, putative	PbANKA_08_v3:177,331..184,960(-)
PBANKA_0712100	null	0.554178	DNA helicase, putative	PbANKA_07_v3:462,724..466,531(+)
PBANKA_0615400	null	0.554178	serine--tRNA ligase, putative	PbANKA_06_v3:641,050..642,660(-)
PBANKA_0405600	EB1	0.554178	microtubule-associated protein RP/EB family, putative	PbANKA_04_v3:201,127..202,434(+)
PBANKA_0304900	SERA3	0.554178	serine repeat antigen 3	PbANKA_03_v3:158,235..161,950(-)
PBANKA_0210300	null	0.554178	conserved Plasmodium protein, unknown function	PbANKA_02_v3:363,312..364,796(+)
PBANKA_0204800	PSOP24	0.554178	secreted ookinete protein, putative	PbANKA_02_v3:162,512..165,722(+)
PBANKA_0102400	null	0.554178	conserved Plasmodium protein, unknown function	PbANKA_01_v3:104,749..110,663(-)
PBANKA_1446100	null	0.522044	amino acid transporter, putative	PbANKA_14_v3:1,766,990..1,772,529(-)
PBANKA_1357000	null	0.522044	aminomethyltransferase, putative	PbANKA_13_v3:2,171,309..2,173,864(+)
PBANKA_1228500	SENP2	0.522044	sentrin-specific protease 2, putative	PbANKA_12_v3:1,109,810..1,114,389(-)
PBANKA_1106300	null	0.522044	GTPase-activating protein, putative	PbANKA_11_v3:252,732..254,483(+)
PBANKA_1012700	null	0.522044	conserved Plasmodium protein, unknown function	PbANKA_10_v3:584,790..589,356(-)
PBANKA_0836000	VPS33	0.522044	vacuolar protein sorting-associated protein 33, putative	PbANKA_08_v3:1,320,240..1,323,734(-)
PBANKA_0717300	CRK3	0.522044	cdc2-related protein kinase 3	PbANKA_07_v3:630,120..633,916(+)
PBANKA_0713700	null	0.522044	tRNA modification GTPase, putative	PbANKA_07_v3:526,187..528,394(-)
PBANKA_0707600	VPS15	0.522044	serine/threonine protein kinase VPS15, putative	PbANKA_07_v3:314,453..318,792(+)
PBANKA_0600700	null	0.496698	conserved Plasmodium protein, unknown function	PbANKA_06_v3:95,250..95,840(-)
PBANKA_1422300	null	0.490602	FAD-dependent monooxygenase, putative	PbANKA_14_v3:872,603..875,425(-)
PBANKA_0910300	GCalpha	0.486358	guanylyl cyclase, putative	PbANKA_09_v3:383,738..395,317(+)
PBANKA_1321100	null	0.483251	conserved Plasmodium protein, unknown function	PbANKA_13_v3:866,960..875,896(+)
PBANKA_1447900	null	0.345152	conserved Plasmodium protein, unknown function	PbANKA_14_v3:1,833,163..1,838,414(-)
PBANKA_1436200	SET10	0.345152	histone-lysine N-methyltransferase, H3 lysine-4 specific, putative	PbANKA_14_v3:1,361,366..1,367,456(-)
PBANKA_1432400	PLP2	0.345152	perforin-like protein 2	PbANKA_14_v3:1,215,984..1,218,983(+)
PBANKA_1007700	PPM1	0.345152	protein phosphatase PPM1	PbANKA_10_v3:361,745..364,742(-)
PBANKA_1007200	RPA1	0.345152	replication protein A1, large subunit, putative	PbANKA_10_v3:344,589..348,101(-)
PBANKA_0609500	null	0.345152	kinesin-7, putative	PbANKA_06_v3:429,944..435,041(+)
PBANKA_0409400	PKRP	0.345152	protein kinase, putative	PbANKA_04_v3:344,922..353,185(+)
PBANKA_0206800	null	0.345152	conserved Plasmodium protein, unknown function	PbANKA_02_v3:232,873..236,811(-)
PBANKA_1329200	null	0.339096	dynein beta chain, putative	PbANKA_13_v3:1,163,008..1,183,973(+)
PBANKA_1111000	null	0.328445	RNA pseudouridylate synthase, putative	PbANKA_11_v3:433,422..462,422(+)
PBANKA_1429900	PIGO	0.32192	GPI ethanolamine phosphate transferase 3, putative	PbANKA_14_v3:1,154,547..1,158,825(+)
PBANKA_1404800	null	0.32192	SAM dependent methyltransferase, putative	PbANKA_14_v3:250,014..253,133(+)
PBANKA_1331700	null	0.32192	zinc finger protein, putative	PbANKA_13_v3:1,287,105..1,289,330(+)
PBANKA_1320700	SPP	0.32192	signal peptide peptidase, putative	PbANKA_13_v3:853,554..856,225(-)
PBANKA_1307800	null	0.32192	heat shock protein 90, putative	PbANKA_13_v3:372,663..375,305(+)
PBANKA_1224500	null	0.32192	C-mannosyltransferase, putative	PbANKA_12_v3:927,275..931,639(-)
PBANKA_1211500	UTP13	0.32192	U3 small nucleolar RNA-associated protein 13, putative	PbANKA_12_v3:423,177..426,933(-)
PBANKA_1126900	PK4	0.32192	eukaryotic translation initiation factor 2-alpha kinase	PbANKA_11_v3:1,010,220..1,017,995(+)
PBANKA_1007300	RF2	0.32192	peptide chain release factor 2, putative	PbANKA_10_v3:349,232..350,184(+)
PBANKA_0833000	PFN	0.32192	profilin	PbANKA_08_v3:1,246,225..1,247,434(+)
PBANKA_0829500	null	0.32192	conserved Plasmodium protein, unknown function	PbANKA_08_v3:1,124,629..1,128,297(-)
PBANKA_0823000	null	0.32192	ubiquitin-like protein, putative	PbANKA_08_v3:896,215..900,850(+)
PBANKA_0418000	DDX60	0.32192	ATP-dependent RNA helicase DDX60, putative	PbANKA_04_v3:680,493..687,924(+)
PBANKA_0411700	null	0.32192	co-chaperone p23, putative	PbANKA_04_v3:418,781..420,411(+)
PBANKA_0210000	VPS51	0.32192	vacuolar protein sorting-associated protein 51, putative	PbANKA_02_v3:352,921..356,811(+)
PBANKA_1362300	null	0.281723	conserved Plasmodium protein, unknown function	PbANKA_13_v3:2,377,710..2,385,824(-)
PBANKA_1126800	null	0.236787	HECT-domain (ubiquitin-transferase), putative	PbANKA_11_v3:979,123..1,005,810(-)
PBANKA_1109400	PI4K	0.226828	phosphatidylinositol 4-kinase, putative	PbANKA_11_v3:368,036..373,112(+)
PBANKA_1004300	null	0.226828	conserved Plasmodium protein, unknown function	PbANKA_10_v3:240,422..244,590(+)
PBANKA_0914100	null	0.226828	conserved Plasmodium protein, unknown function	PbANKA_09_v3:533,531..539,818(-)
PBANKA_0502600	null	0.226828	conserved Plasmodium protein, unknown function	PbANKA_05_v3:96,257..98,404(-)
PBANKA_0417600	CCp4	0.226828	LCCL domain-containing protein	PbANKA_04_v3:658,002..662,733(-)
PBANKA_1449000	null	0.184228	aspartyl protease, putative	PbANKA_14_v3:1,897,825..1,900,136(-)
PBANKA_1434400	PSOP17	0.184228	secreted ookinete protein, putative	PbANKA_14_v3:1,283,739..1,285,670(-)
PBANKA_1039800	null	0.184228	conserved Plasmodium protein, unknown function	PbANKA_10_v3:1,585,829..1,588,243(-)
PBANKA_1039500	null	0.184228	zinc finger protein, putative	PbANKA_10_v3:1,578,256..1,579,851(+)
PBANKA_1011500	null	0.184228	conserved Plasmodium protein, unknown function	PbANKA_10_v3:530,471..544,840(+)
PBANKA_0707000	LipB	0.184228	lipoate-protein ligase B	PbANKA_07_v3:294,407..295,693(+)
PBANKA_0112200	null	0.184228	myosin-like protein, putative	PbANKA_01_v3:473,752..479,628(-)
PBANKA_0719500	null	0.177852	conserved Plasmodium protein, unknown function	PbANKA_07_v3:693,816..708,310(+)
PBANKA_0801800	null	0.141602	conserved Plasmodium protein, unknown function	PbANKA_08_v3:97,389..106,340(+)
PBANKA_0622400	null	0.141602	kinesin-19, putative	PbANKA_06_v3:897,627..903,968(+)
PBANKA_1434300	null	0.0918923	conserved Plasmodium protein, unknown function	PbANKA_14_v3:1,281,442..1,283,016(-)
PBANKA_1412200	null	0.0918923	conserved Plasmodium protein, unknown function	PbANKA_14_v3:511,408..521,349(-)
PBANKA_1360700	null	0.0918923	conserved Plasmodium protein, unknown function	PbANKA_13_v3:2,309,220..2,314,892(-)
PBANKA_1301800	null	0.0918923	conserved Plasmodium protein, unknown function	PbANKA_13_v3:103,468..114,090(-)
PBANKA_1035700	WDR65	0.0918923	WD repeat-containing protein 65, putative	PbANKA_10_v3:1,448,272..1,452,785(+)
PBANKA_0615700	null	0.0918923	dynein heavy chain, putative	PbANKA_06_v3:651,662..669,302(-)
PBANKA_0404300	null	0.0918923	P-loop containing nucleoside triphosphate hydrolase, putative	PbANKA_04_v3:167,234..169,948(+)
PBANKA_1435500	null	0.0770874	conserved Plasmodium protein, unknown function	PbANKA_14_v3:1,335,878..1,344,036(+)
PBANKA_0901900	null	0.0770874	tubulin--tyrosine ligase, putative	PbANKA_09_v3:53,283..61,823(-)
PBANKA_1358300	null	0.0278343	conserved Plasmodium protein, unknown function	PbANKA_13_v3:2,219,890..2,224,638(-)
PBANKA_1014400	null	0.0264588	acid phosphatase, putative	PbANKA_10_v3:633,605..639,883(+)
PBANKA_1450400	null	0.0252689	conserved Plasmodium protein, unknown function	PbANKA_14_v3:1,947,196..1,954,851(-)
PBANKA_1360800	null	0.0252689	conserved Plasmodium protein, unknown function	PbANKA_13_v3:2,316,141..2,320,421(-)
PBANKA_1300800	CRMP4	0.0252689	cysteine repeat modular protein 4	PbANKA_13_v3:59,582..75,942(+)
PBANKA_1227700	null	0.0252689	inositol 5-phosphatase, putative	PbANKA_12_v3:1,059,613..1,063,440(+)
PBANKA_0822900	null	0.0252689	dynein intermediate chain, putative	PbANKA_08_v3:891,058..894,323(+)
PBANKA_0102800	null	0.0252689	conserved Plasmodium protein, unknown function	PbANKA_01_v3:125,050..129,579(-)
PBANKA_0112300	null	-0.0143778	conserved Plasmodium protein, unknown function	PbANKA_01_v3:482,503..485,040(-)
PBANKA_0214400	AP2-L	-0.0252301	AP2 domain transcription factor AP2-L	PbANKA_02_v3:543,241..547,059(+)
PBANKA_1332800	ACC	-0.0480377	biotin carboxylase subunit of acetyl CoA carboxylase, putative	PbANKA_13_v3:1,326,375..1,335,790(+)
PBANKA_1207900	null	-0.0480377	protein phosphatase, putative	PbANKA_12_v3:309,252..310,442(+)
PBANKA_1320200	null	-0.0648996	conserved Plasmodium protein, unknown function	PbANKA_13_v3:832,204..839,031(+)
PBANKA_0417300	null	-0.0648996	AP-4 complex subunit epsilon, putative	PbANKA_04_v3:648,481..652,812(+)
PBANKA_1406900	null	-0.123334	conserved Plasmodium protein, unknown function	PbANKA_14_v3:317,519..332,314(-)
PBANKA_1133100	ARK3	-0.145503	serine/threonine protein kinase, putative	PbANKA_11_v3:1,238,937..1,249,964(+)
PBANKA_1359300	null	-0.192718	conserved Plasmodium protein, unknown function	PbANKA_13_v3:2,254,442..2,270,746(+)
PBANKA_1464800	null	-0.194921	conserved Plasmodium protein, unknown function	PbANKA_14_v3:2,434,711..2,436,351(-)
PBANKA_1464400	null	-0.194921	conserved Plasmodium protein, unknown function	PbANKA_14_v3:2,422,996..2,424,378(-)
PBANKA_1464200	TMK	-0.194921	thymidylate kinase, putative	PbANKA_14_v3:2,420,754..2,422,195(-)
PBANKA_1464000	null	-0.194921	conserved Plasmodium protein, unknown function	PbANKA_14_v3:2,416,493..2,417,169(+)
PBANKA_1463700	null	-0.194921	DNA repair protein rhp16, putative	PbANKA_14_v3:2,404,537..2,409,345(+)
PBANKA_1463500	null	-0.194921	translation initiation factor eIF-2B subunit beta, putative	PbANKA_14_v3:2,399,842..2,401,434(-)
PBANKA_1462600	null	-0.194921	conserved Plasmodium protein, unknown function	PbANKA_14_v3:2,358,258..2,360,471(-)
PBANKA_1462500	LRR12	-0.194921	leucine-rich repeat protein	PbANKA_14_v3:2,354,485..2,356,981(-)
PBANKA_1462100	null	-0.194921	conserved Plasmodium protein, unknown function	PbANKA_14_v3:2,345,306..2,345,761(+)
PBANKA_1461900	null	-0.194921	conserved Plasmodium protein, unknown function	PbANKA_14_v3:2,340,216..2,342,285(-)
PBANKA_1461600	null	-0.194921	conserved Plasmodium protein, unknown function	PbANKA_14_v3:2,330,758..2,335,425(+)
PBANKA_1461300	null	-0.194921	conserved Plasmodium protein, unknown function	PbANKA_14_v3:2,319,026..2,319,889(+)
PBANKA_1461200	null	-0.194921	conserved Plasmodium protein, unknown function	PbANKA_14_v3:2,317,010..2,317,423(-)
PBANKA_1460700	DPAP2	-0.194921	dipeptidyl aminopeptidase 2	PbANKA_14_v3:2,307,116..2,309,656(+)
PBANKA_1459500	MTIP	-0.194921	myosin A tail domain interacting protein MTIP, putative	PbANKA_14_v3:2,277,418..2,278,032(+)
PBANKA_1457800	ARFGAP	-0.194921	ADP-ribosylation factor GTPase-activating protein, putative	PbANKA_14_v3:2,220,226..2,221,116(-)
PBANKA_1457200	DOC2	-0.194921	double C2-like domain-containing protein, putative	PbANKA_14_v3:2,189,236..2,195,255(-)
PBANKA_1457100	WDR82	-0.194921	WD repeat-containing protein 82, putative	PbANKA_14_v3:2,186,512..2,188,040(-)
PBANKA_1457000	null	-0.194921	ubiquitin-conjugating enzyme E2, putative	PbANKA_14_v3:2,184,628..2,185,866(+)
PBANKA_1456900	null	-0.194921	translation initiation factor SUI1, putative	PbANKA_14_v3:2,182,341..2,183,305(+)
PBANKA_1456600	null	-0.194921	conserved Plasmodium protein, unknown function	PbANKA_14_v3:2,174,487..2,174,738(+)
PBANKA_1456000	null	-0.194921	protein farnesyltransferase subunit alpha, putative	PbANKA_14_v3:2,160,693..2,162,456(+)
PBANKA_1455800	null	-0.194921	GAS8-like protein, putative	PbANKA_14_v3:2,156,414..2,158,171(+)
PBANKA_1455700	null	-0.194921	conserved Plasmodium protein, unknown function	PbANKA_14_v3:2,154,223..2,155,534(-)
PBANKA_1454900	UIS8	-0.194921	conserved Plasmodium protein, unknown function	PbANKA_14_v3:2,134,467..2,135,867(-)
PBANKA_1454700	null	-0.194921	conserved Plasmodium protein, unknown function	PbANKA_14_v3:2,120,748..2,122,409(-)
PBANKA_1454300	VPS16	-0.194921	vacuolar protein sorting-associated protein 16, putative	PbANKA_14_v3:2,103,449..2,106,346(-)
PBANKA_1453700	ApiAP2	-0.194921	AP2 domain transcription factor, putative	PbANKA_14_v3:2,065,254..2,069,711(+)
PBANKA_1453200	null	-0.194921	conserved Plasmodium protein, unknown function	PbANKA_14_v3:2,042,411..2,044,519(+)
PBANKA_1453100	null	-0.194921	sphingomyelin phosphodiesterase, putative	PbANKA_14_v3:2,038,408..2,039,928(-)
PBANKA_1452900	null	-0.194921	conserved Plasmodium protein, unknown function	PbANKA_14_v3:2,031,894..2,033,144(-)
PBANKA_1452800	CWC22	-0.194921	pre-mRNA-splicing factor CWC22, putative	PbANKA_14_v3:2,028,843..2,031,548(+)
PBANKA_1452200	PWP1	-0.194921	periodic tryptophan protein 1, putative	PbANKA_14_v3:2,013,949..2,015,855(+)
PBANKA_1451800	null	-0.194921	conserved Plasmodium protein, unknown function	PbANKA_14_v3:1,996,862..2,001,532(+)
PBANKA_1451100	null	-0.194921	conserved Plasmodium protein, unknown function	PbANKA_14_v3:1,975,355..1,976,158(-)
PBANKA_1449800	VP2	-0.194921	inorganic pyrophosphatase, putative	PbANKA_14_v3:1,923,416..1,926,511(-)
PBANKA_1449500	null	-0.194921	conserved Plasmodium protein, unknown function	PbANKA_14_v3:1,917,753..1,918,499(+)
PBANKA_1448800	null	-0.194921	helicase, putative	PbANKA_14_v3:1,889,266..1,894,449(+)
PBANKA_1447300	null	-0.194921	conserved Plasmodium protein, unknown function	PbANKA_14_v3:1,816,113..1,817,078(+)
PBANKA_1446600	null	-0.194921	conserved Plasmodium protein, unknown function	PbANKA_14_v3:1,795,888..1,798,980(+)
PBANKA_1444400	null	-0.194921	conserved Plasmodium protein, unknown function	PbANKA_14_v3:1,701,164..1,703,059(+)
PBANKA_1444000	MIF	-0.194921	macrophage migration inhibitory factor	PbANKA_14_v3:1,693,176..1,693,674(+)
PBANKA_1443900	null	-0.194921	conserved Plasmodium protein, unknown function	PbANKA_14_v3:1,689,898..1,692,087(+)
PBANKA_1443700	null	-0.194921	conserved Plasmodium protein, unknown function	PbANKA_14_v3:1,674,349..1,679,065(+)
PBANKA_1443600	null	-0.194921	conserved Plasmodium protein, unknown function	PbANKA_14_v3:1,668,537..1,673,051(-)
PBANKA_1443200	null	-0.194921	RNA pseudouridylate synthase, putative	PbANKA_14_v3:1,649,368..1,650,913(+)
PBANKA_1442400	null	-0.194921	conserved Plasmodium protein, unknown function	PbANKA_14_v3:1,622,032..1,624,802(-)
PBANKA_1442300	null	-0.194921	conserved Plasmodium protein, unknown function	PbANKA_14_v3:1,618,589..1,621,048(+)
PBANKA_1442000	KCh1	-0.194921	potassium channel	PbANKA_14_v3:1,582,805..1,588,747(+)
PBANKA_1441600	ATX3	-0.194921	ataxin-3, putative	PbANKA_14_v3:1,571,105..1,573,006(+)
PBANKA_1441500	RRP9	-0.194921	U3 small nucleolar RNA-interacting protein 2, putative	PbANKA_14_v3:1,567,617..1,569,461(+)
PBANKA_1441300	null	-0.194921	RAP protein, putative	PbANKA_14_v3:1,559,571..1,563,458(+)
PBANKA_1441200	null	-0.194921	conserved Plasmodium protein, unknown function	PbANKA_14_v3:1,555,353..1,558,392(-)
PBANKA_1440400	null	-0.194921	small subunit rRNA processing factor, putative	PbANKA_14_v3:1,526,132..1,527,635(+)
PBANKA_1440100	null	-0.194921	conserved Plasmodium protein, unknown function	PbANKA_14_v3:1,519,085..1,521,797(-)
PBANKA_1437900	null	-0.194921	conserved Plasmodium protein, unknown function	PbANKA_14_v3:1,431,837..1,432,826(-)
PBANKA_1437400	DPH6	-0.194921	diphthine--ammonia ligase, putative	PbANKA_14_v3:1,408,104..1,410,203(-)
PBANKA_1437000	null	-0.194921	conserved Plasmodium protein, unknown function	PbANKA_14_v3:1,391,980..1,394,172(+)
PBANKA_1436700	null	-0.194921	conserved Plasmodium protein, unknown function	PbANKA_14_v3:1,383,321..1,385,780(+)
PBANKA_1436300	null	-0.194921	conserved Plasmodium protein, unknown function	PbANKA_14_v3:1,370,499..1,372,762(+)
PBANKA_1435700	TSR3	-0.194921	ribosome biogenesis protein TSR3, putative	PbANKA_14_v3:1,346,343..1,347,359(-)
PBANKA_1434900	RKIP	-0.194921	raf kinase inhibitor, putative	PbANKA_14_v3:1,316,771..1,317,343(-)
PBANKA_1434700	null	-0.194921	clathrin heavy chain, putative	PbANKA_14_v3:1,303,281..1,309,241(+)
PBANKA_1433600	TRAMP	-0.194921	thrombospondin-related apical membrane protein	PbANKA_14_v3:1,252,144..1,253,190(+)
PBANKA_1432100	null	-0.194921	conserved Plasmodium protein, unknown function	PbANKA_14_v3:1,207,901..1,210,099(+)
PBANKA_1431900	null	-0.194921	glycerol-3-phosphate dehydrogenase, putative	PbANKA_14_v3:1,203,167..1,205,064(+)
PBANKA_1431600	SR10	-0.194921	serpentine receptor, putative	PbANKA_14_v3:1,195,800..1,197,578(+)
PBANKA_1430300	null	-0.194921	conserved Plasmodium protein, unknown function	PbANKA_14_v3:1,164,669..1,165,910(+)
PBANKA_1429700	null	-0.194921	conserved Plasmodium protein, unknown function	PbANKA_14_v3:1,148,810..1,151,495(-)
PBANKA_1428800	null	-0.194921	iron-sulfur subunit of succinate dehydrogenase, putative	PbANKA_14_v3:1,121,810..1,122,775(+)
PBANKA_1428300	null	-0.194921	WD repeat-containing protein, putative	PbANKA_14_v3:1,100,129..1,105,113(+)
PBANKA_1428100	null	-0.194921	asparagine-rich antigen, putative	PbANKA_14_v3:1,093,654..1,096,635(+)
PBANKA_1427600	null	-0.194921	conserved Plasmodium protein, unknown function	PbANKA_14_v3:1,060,277..1,064,153(+)
PBANKA_1427300	null	-0.194921	ABC1 family, putative	PbANKA_14_v3:1,053,463..1,056,246(-)
PBANKA_1425600	null	-0.194921	RNA-binding protein, putative	PbANKA_14_v3:982,036..986,442(-)
PBANKA_1425350	null	-0.194921	GTPase, putative	PbANKA_14_v3:968,690..970,269(+)
PBANKA_1425200	SSP3	-0.194921	sporozoite surface protein 3, putative	PbANKA_14_v3:963,622..964,935(+)
PBANKA_1425000	null	-0.194921	RNA-binding protein, putative	PbANKA_14_v3:955,332..957,863(+)
PBANKA_1424900	null	-0.194921	ubiquitin-conjugating enzyme E2, putative	PbANKA_14_v3:952,676..953,298(+)
PBANKA_1424300	null	-0.194921	conserved Plasmodium protein, unknown function	PbANKA_14_v3:934,017..935,308(-)
PBANKA_1423700	GMD	-0.194921	GDP-mannose 4,6-dehydratase, putative	PbANKA_14_v3:914,537..915,622(-)
PBANKA_1422900	null	-0.194921	conserved Plasmodium protein, unknown function	PbANKA_14_v3:892,190..893,371(+)
PBANKA_1422600	Sel3	-0.194921	selenoprotein, putative	PbANKA_14_v3:886,557..887,576(+)
PBANKA_1421900	null	-0.194921	GTP-binding translation elongation factor, putative	PbANKA_14_v3:863,090..865,360(+)
PBANKA_1421600	null	-0.194921	calcium/calmodulin-dependent protein kinase, putative	PbANKA_14_v3:856,842..858,820(-)
PBANKA_1421100	null	-0.194921	transcription elongation factor s-II, putative	PbANKA_14_v3:843,087..844,187(+)
PBANKA_1420800	null	-0.194921	conserved Plasmodium protein, unknown function	PbANKA_14_v3:831,082..834,675(+)
PBANKA_1420200	null	-0.194921	mitochondrial ribosomal protein S5 precursor, putative	PbANKA_14_v3:802,824..805,670(+)
PBANKA_1417800	TRM1	-0.194921	tRNA (guanine(26)-N(2))-dimethyltransferase, putative	PbANKA_14_v3:705,911..708,346(-)
PBANKA_1417100	null	-0.194921	conserved Plasmodium protein, unknown function	PbANKA_14_v3:680,186..681,910(+)
PBANKA_1416700	G3PAT	-0.194921	glycerol-3-phosphate 1-O-acyltransferase	PbANKA_14_v3:663,859..665,076(+)
PBANKA_1416300	RPS19	-0.194921	40S ribosomal protein S19, putative	PbANKA_14_v3:653,704..654,794(+)
PBANKA_1416100	null	-0.194921	conserved Plasmodium protein, unknown function	PbANKA_14_v3:648,605..651,220(+)
PBANKA_1415800	null	-0.194921	conserved Plasmodium protein, unknown function	PbANKA_14_v3:643,888..645,345(-)
PBANKA_1415600	MCM4	-0.194921	DNA replication licensing factor MCM4, putative	PbANKA_14_v3:625,628..628,462(+)
PBANKA_1415500	USP39	-0.194921	U4/U6.U5 tri-snRNP-associated protein 2, putative	PbANKA_14_v3:621,860..623,788(+)
PBANKA_1415400	null	-0.194921	conserved Plasmodium protein, unknown function	PbANKA_14_v3:616,519..618,813(-)
PBANKA_1415200	null	-0.194921	conserved Plasmodium protein, unknown function	PbANKA_14_v3:611,175..613,367(+)
PBANKA_1414600	IPK2	-0.194921	inositol polyphosphate kinase, putative	PbANKA_14_v3:592,322..595,450(+)
PBANKA_1414500	null	-0.194921	protein kinase, putative	PbANKA_14_v3:587,730..590,019(-)
PBANKA_1414200	GCD14	-0.194921	tRNA (adenine(58)-N(1))-methyltransferase catalytic subunit TRM61, putative	PbANKA_14_v3:577,807..578,769(+)
PBANKA_1414000	null	-0.194921	conserved Plasmodium protein, unknown function	PbANKA_14_v3:572,696..573,616(-)
PBANKA_1413800	null	-0.194921	conserved Plasmodium protein, unknown function	PbANKA_14_v3:564,735..566,385(+)
PBANKA_1413000	null	-0.194921	cop-coated vesicle membrane protein p24 precursor, putative	PbANKA_14_v3:544,167..545,297(-)
PBANKA_1412500	null	-0.194921	conserved Plasmodium protein, unknown function	PbANKA_14_v3:529,807..531,864(+)
PBANKA_1412000	null	-0.194921	conserved Plasmodium protein, unknown function	PbANKA_14_v3:502,680..508,490(-)
PBANKA_1411600	null	-0.194921	methionyl-tRNA formyltransferase, putative	PbANKA_14_v3:490,078..492,027(+)
PBANKA_1411200	null	-0.194921	conserved Plasmodium protein, unknown function	PbANKA_14_v3:463,588..470,025(-)
PBANKA_1410900	IF2a	-0.194921	translation initiation factor IF-2, putative	PbANKA_14_v3:454,004..457,234(+)
PBANKA_1410700	null	-0.194921	conserved Plasmodium protein, unknown function	PbANKA_14_v3:451,363..452,496(+)
PBANKA_1410100	null	-0.194921	conserved Plasmodium protein, unknown function	PbANKA_14_v3:430,642..432,102(+)
PBANKA_1409800	null	-0.194921	ATP synthase subunit gamma, mitochondrial, putative	PbANKA_14_v3:421,044..422,318(+)
PBANKA_1409100	RAB5b	-0.194921	ras-related protein Rab-5B, putative	PbANKA_14_v3:403,607..404,850(-)
PBANKA_1408500	OSCP	-0.194921	ATP synthase subunit O, mitochondrial, putative	PbANKA_14_v3:386,133..386,903(+)
PBANKA_1408300	null	-0.194921	conserved Plasmodium protein, unknown function	PbANKA_14_v3:382,835..383,935(-)
PBANKA_1407900	null	-0.194921	HORMA domain protein, putative	PbANKA_14_v3:370,391..373,534(+)
PBANKA_1407800	PRPF3	-0.194921	U4/U6 small nuclear ribonucleoprotein PRP3, putative	PbANKA_14_v3:365,954..367,993(-)
PBANKA_1407100	null	-0.194921	conserved Plasmodium protein, unknown function	PbANKA_14_v3:336,477..340,514(-)
PBANKA_1406800	RPS27	-0.194921	40S ribosomal protein S27, putative	PbANKA_14_v3:316,433..316,872(+)
PBANKA_1406700	CPSII	-0.194921	carbamoyl phosphate synthetase, putative	PbANKA_14_v3:306,823..313,673(-)
PBANKA_1406200	null	-0.194921	conserved Plasmodium protein, unknown function	PbANKA_14_v3:290,105..293,707(+)
PBANKA_1405800	DBP6	-0.194921	ATP-dependent RNA helicase DBP6, putative	PbANKA_14_v3:279,790..281,757(+)
PBANKA_1405700	null	-0.194921	DnaJ protein, putative	PbANKA_14_v3:278,148..279,065(-)
PBANKA_1405500	RRP40	-0.194921	exosome complex component RRP40, putative	PbANKA_14_v3:272,762..273,861(-)
PBANKA_1404400	null	-0.194921	conserved Plasmodium protein, unknown function	PbANKA_14_v3:236,578..238,198(-)
PBANKA_1404200	null	-0.194921	conserved Plasmodium protein, unknown function	PbANKA_14_v3:232,983..233,594(+)
PBANKA_1404100	S2P	-0.194921	site-2 protease S2P	PbANKA_14_v3:229,815..230,942(-)
PBANKA_1403900	null	-0.194921	AAR2 protein, putative	PbANKA_14_v3:224,777..226,621(-)
PBANKA_1403300	NIF1	-0.194921	NLI interacting factor-like phosphatase	PbANKA_14_v3:195,259..200,097(-)
PBANKA_1403200	null	-0.194921	cyclin, putative	PbANKA_14_v3:192,203..193,633(+)
PBANKA_1402700	MIT2	-0.194921	CorA-like Mg2+ transporter protein, putative	PbANKA_14_v3:177,030..178,705(-)
PBANKA_1402500	null	-0.194921	condensin complex subunit 2, putative	PbANKA_14_v3:167,699..170,935(-)
PBANKA_1402200	null	-0.194921	conserved Plasmodium protein, unknown function	PbANKA_14_v3:134,690..138,234(+)
PBANKA_1401600	null	-0.194921	methyltransferase-like protein, putative	PbANKA_14_v3:116,296..117,183(+)
PBANKA_1401100	DOHH	-0.194921	deoxyhypusine hydroxylase, putative	PbANKA_14_v3:100,816..101,847(-)
PBANKA_1401000	null	-0.194921	conserved Plasmodium protein, unknown function	PbANKA_14_v3:90,644..98,989(-)
PBANKA_1364900	UTP15	-0.194921	U3 small nucleolar RNA-associated protein 15, putative	PbANKA_13_v3:2,460,632..2,462,935(+)
PBANKA_1364700	null	-0.194921	conserved Plasmodium protein, unknown function	PbANKA_13_v3:2,450,472..2,455,823(+)
PBANKA_1364600	null	-0.194921	conserved Plasmodium protein, unknown function	PbANKA_13_v3:2,448,824..2,450,068(-)
PBANKA_1364400	IMC1f	-0.194921	inner membrane complex protein 1f, putative	PbANKA_13_v3:2,442,196..2,445,846(+)
PBANKA_1364000	null	-0.194921	conserved Plasmodium protein, unknown function	PbANKA_13_v3:2,427,640..2,431,995(+)
PBANKA_1363900	null	-0.194921	conserved protein, unknown function	PbANKA_13_v3:2,425,170..2,426,244(-)
PBANKA_1363700	AP2-O4	-0.194921	AP2 domain transcription factor AP2-O4	PbANKA_13_v3:2,414,321..2,416,012(-)
PBANKA_1363300	null	-0.194921	conserved Plasmodium protein, unknown function	PbANKA_13_v3:2,404,045..2,406,870(-)
PBANKA_1362500	null	-0.194921	peptidase, putative	PbANKA_13_v3:2,388,327..2,389,361(+)
PBANKA_1361900	null	-0.194921	nucleoside diphosphate hydrolase, putative	PbANKA_13_v3:2,363,706..2,364,612(-)
PBANKA_1361600	null	-0.194921	E1-E2 ATPase, putative	PbANKA_13_v3:2,353,365..2,358,953(+)
PBANKA_1361500	WDR16	-0.194921	WD repeat-containing protein 16, putative	PbANKA_13_v3:2,349,366..2,352,348(-)
PBANKA_1361100	null	-0.194921	elongation factor Tu, putative	PbANKA_13_v3:2,325,550..2,329,869(-)
PBANKA_1360400	null	-0.194921	conserved Plasmodium protein, unknown function	PbANKA_13_v3:2,299,437..2,302,036(+)
PBANKA_1360000	TOP3	-0.194921	DNA topoisomerase 3, putative	PbANKA_13_v3:2,286,751..2,288,778(+)
PBANKA_1359800	null	-0.194921	conserved Plasmodium protein, unknown function	PbANKA_13_v3:2,281,675..2,282,220(+)
PBANKA_1359400	null	-0.194921	conserved Plasmodium protein, unknown function	PbANKA_13_v3:2,271,719..2,273,401(+)
PBANKA_1359200	ALBA2	-0.194921	DNA/RNA-binding protein Alba 2, putative	PbANKA_13_v3:2,252,091..2,253,046(+)
PBANKA_1359000	SEC61	-0.194921	protein transport protein SEC61 subunit alpha, putative	PbANKA_13_v3:2,246,901..2,248,738(+)
PBANKA_1358400	null	-0.194921	ubiquitin-conjugating enzyme E2, putative	PbANKA_13_v3:2,226,697..2,227,527(+)
PBANKA_1358100	ROM6	-0.194921	rhomboid protease ROM6	PbANKA_13_v3:2,215,383..2,216,990(-)
PBANKA_1358000	TRX2	-0.194921	thioredoxin 2	PbANKA_13_v3:2,212,894..2,214,108(-)
PBANKA_1357500	LipA	-0.194921	lipoyl synthase	PbANKA_13_v3:2,194,101..2,195,492(+)
PBANKA_1357400	USB1	-0.194921	U6 snRNA phosphodiesterase, putative	PbANKA_13_v3:2,192,165..2,193,374(-)
PBANKA_1357200	HSP110	-0.194921	heat shock protein 110, putative	PbANKA_13_v3:2,179,879..2,182,632(+)
PBANKA_1356900	PRPF4	-0.194921	U4/U6 small nuclear ribonucleoprotein PRP4, putative	PbANKA_13_v3:2,168,520..2,170,367(+)
PBANKA_1356500	null	-0.194921	conserved Plasmodium protein, unknown function	PbANKA_13_v3:2,136,029..2,137,346(+)
PBANKA_1356300	null	-0.194921	conserved Plasmodium protein, unknown function	PbANKA_13_v3:2,125,353..2,128,220(-)
PBANKA_1334200	RCL1	-0.194921	RNA 3'-terminal phosphate cyclase-like protein, putative	PbANKA_13_v3:1,371,501..1,372,985(+)
PBANKA_1333800	null	-0.194921	RAP protein, putative	PbANKA_13_v3:1,359,089..1,360,276(-)
PBANKA_1333100	null	-0.194921	conserved Plasmodium protein, unknown function	PbANKA_13_v3:1,339,257..1,340,787(+)
PBANKA_1333000	null	-0.194921	conserved Plasmodium protein, unknown function	PbANKA_13_v3:1,338,182..1,339,172(-)
PBANKA_1332400	SHLP1	-0.194921	shewanella-like protein phosphatase 1	PbANKA_13_v3:1,312,038..1,313,126(-)
PBANKA_1331500	null	-0.194921	conserved Plasmodium protein, unknown function	PbANKA_13_v3:1,280,813..1,281,442(+)
PBANKA_1331100	null	-0.194921	conserved Plasmodium protein, unknown function	PbANKA_13_v3:1,250,556..1,251,229(+)
PBANKA_1330300	null	-0.194921	rhoptry protein, putative	PbANKA_13_v3:1,230,764..1,234,005(+)
PBANKA_1330200	null	-0.194921	conserved Plasmodium protein, unknown function	PbANKA_13_v3:1,226,866..1,229,535(+)
PBANKA_1329600	null	-0.194921	conserved Plasmodium protein, unknown function	PbANKA_13_v3:1,195,320..1,201,667(-)
PBANKA_1329500	PPKL	-0.194921	protein phosphatase containing kelch-like domains	PbANKA_13_v3:1,191,321..1,194,066(+)
PBANKA_1322700	null	-0.194921	ATP-dependent RNA helicase DBP5, putative	PbANKA_13_v3:933,071..935,107(+)
PBANKA_1322600	TVP23	-0.194921	golgi apparatus membrane protein TVP23, putative	PbANKA_13_v3:930,278..931,285(+)
PBANKA_1322100	ADCL	-0.194921	aminodeoxychorismate lyase, putative	PbANKA_13_v3:911,823..912,773(-)
PBANKA_1321400	UIS20	-0.194921	large ribosomal subunit nuclear export factor, putative	PbANKA_13_v3:882,424..886,671(+)
PBANKA_1320600	null	-0.194921	conserved protein, unknown function	PbANKA_13_v3:851,470..852,524(+)
PBANKA_1320300	null	-0.194921	mitochondrial ribosomal protein L28 precursor, putative	PbANKA_13_v3:839,513..840,358(-)
PBANKA_1320100	UIS25	-0.194921	conserved Plasmodium protein, unknown function	PbANKA_13_v3:827,417..830,117(-)
PBANKA_1319900	null	-0.194921	conserved Plasmodium protein, unknown function	PbANKA_13_v3:822,030..824,726(+)
PBANKA_1319200	null	-0.194921	AP-1 complex subunit gamma, putative	PbANKA_13_v3:788,505..792,186(+)
PBANKA_1319100	HlyIII	-0.194921	hemolysin III, putative	PbANKA_13_v3:785,065..786,124(-)
PBANKA_1318600	null	-0.194921	conserved Plasmodium protein, unknown function	PbANKA_13_v3:769,386..769,847(-)
PBANKA_1318400	null	-0.194921	6-phosphogluconate dehydrogenase, decarboxylating, putative	PbANKA_13_v3:765,291..766,709(+)
PBANKA_1318200	ISU	-0.194921	iron sulfur cluster assembly protein, putative	PbANKA_13_v3:761,979..762,464(+)
PBANKA_1317900	null	-0.194921	conserved Plasmodium protein, unknown function	PbANKA_13_v3:747,577..751,683(-)
PBANKA_1317600	null	-0.194921	conserved Plasmodium protein, unknown function	PbANKA_13_v3:741,168..743,660(+)
PBANKA_1316200	null	-0.194921	SNARE protein, putative	PbANKA_13_v3:680,719..682,358(-)
PBANKA_1315900	null	-0.194921	aminomethyltransferase, putative	PbANKA_13_v3:673,020..674,597(+)
PBANKA_1315400	CNB	-0.194921	calcineurin subunit B, putative	PbANKA_13_v3:649,367..650,754(-)
PBANKA_1315300	LAP5	-0.194921	LCCL domain-containing protein	PbANKA_13_v3:645,706..648,581(-)
PBANKA_1315100	Sir2b	-0.194921	transcriptional regulatory protein sir2b	PbANKA_13_v3:640,262..643,747(+)
PBANKA_1314700	null	-0.194921	conserved Plasmodium protein, unknown function	PbANKA_13_v3:619,440..621,836(-)
PBANKA_1314600	null	-0.194921	acetyl-CoA acetyltransferase, putative	PbANKA_13_v3:617,436..618,996(+)
PBANKA_1313700	null	-0.194921	serine/threonine protein kinase, putative	PbANKA_13_v3:585,670..587,945(+)
PBANKA_1313400	RRP6	-0.194921	exosome complex exonuclease RRP6, putative	PbANKA_13_v3:577,377..580,640(-)
PBANKA_1313100	MUS81	-0.194921	crossover junction endonuclease MUS81, putative	PbANKA_13_v3:561,936..565,684(-)
PBANKA_1311700	MDR2	-0.194921	multidrug resistance protein 2, putative	PbANKA_13_v3:514,981..517,827(-)
PBANKA_1310500	null	-0.194921	conserved Plasmodium protein, unknown function	PbANKA_13_v3:484,209..486,129(-)
PBANKA_1309900	LAP	-0.194921	M17 leucyl aminopeptidase, putative	PbANKA_13_v3:461,027..462,934(-)
PBANKA_1309200	CLK1	-0.194921	serine/threonine kinase-1, putative	PbANKA_13_v3:433,328..435,751(-)
PBANKA_1307500	null	-0.194921	gamma-tubulin complex component, putative	PbANKA_13_v3:361,321..366,633(-)
PBANKA_1307400	PARN	-0.194921	poly(A)-specific ribonuclease PARN, putative	PbANKA_13_v3:357,710..360,058(-)
PBANKA_1307100	null	-0.194921	conserved Plasmodium protein, unknown function	PbANKA_13_v3:350,046..352,008(+)
PBANKA_1306800	SEC7	-0.194921	protein transport protein SEC7, putative	PbANKA_13_v3:332,563..341,553(+)
PBANKA_1306600	null	-0.194921	conserved Plasmodium protein, unknown function	PbANKA_13_v3:322,605..329,041(+)
PBANKA_1306200	tRIP	-0.194921	tRNA import protein tRIP, putative	PbANKA_13_v3:297,567..299,061(-)
PBANKA_1306100	null	-0.194921	GTP-binding protein, putative	PbANKA_13_v3:293,891..296,677(-)
PBANKA_1305200	null	-0.194921	serine/threonine protein kinase, putative	PbANKA_13_v3:267,718..274,858(+)
PBANKA_1304900	NCS2	-0.194921	cytoplasmic tRNA 2-thiolation protein 2, putative	PbANKA_13_v3:257,064..258,737(-)
PBANKA_1304800	null	-0.194921	conserved Plasmodium protein, unknown function	PbANKA_13_v3:255,504..256,769(+)
PBANKA_1304500	null	-0.194921	conserved Plasmodium protein, unknown function	PbANKA_13_v3:245,031..248,476(+)
PBANKA_1304300	null	-0.194921	conserved Plasmodium protein, unknown function	PbANKA_13_v3:235,505..239,315(-)
PBANKA_1304100	PBGS	-0.194921	porphobilinogen synthase, putative	PbANKA_13_v3:227,665..229,973(+)
PBANKA_1303200	null	-0.194921	Sad1/UNC domain-containing protein, putative	PbANKA_13_v3:187,107..192,306(+)
PBANKA_1303000	null	-0.194921	DEAD/DEAH box helicase, putative	PbANKA_13_v3:173,257..180,887(+)
PBANKA_1302700	null	-0.194921	conserved Plasmodium protein, unknown function	PbANKA_13_v3:163,946..167,105(+)
PBANKA_1301500	null	-0.194921	protein kinase, putative	PbANKA_13_v3:94,792..97,307(+)
PBANKA_1301100	null	-0.194921	conserved Plasmodium protein, unknown function	PbANKA_13_v3:81,559..85,803(-)
PBANKA_1300700	CCp1	-0.194921	LCCL domain-containing protein	PbANKA_13_v3:52,618..57,465(-)
PBANKA_1234700	null	-0.194921	conserved Plasmodium protein, unknown function	PbANKA_12_v3:1,333,450..1,334,790(-)
PBANKA_1234500	null	-0.194921	FoP domain-containing protein, putative	PbANKA_12_v3:1,323,717..1,326,027(+)
PBANKA_1234400	null	-0.194921	zinc finger protein, putative	PbANKA_12_v3:1,320,071..1,321,960(+)
PBANKA_1233800	SLBP	-0.194921	histone RNA hairpin-binding protein, putative	PbANKA_12_v3:1,300,356..1,301,255(+)
PBANKA_1232800	null	-0.194921	NOSIP domain-containing protein, putative	PbANKA_12_v3:1,265,470..1,267,154(+)
PBANKA_1232300	null	-0.194921	UTP--glucose-1-phosphate uridylyltransferase, putative	PbANKA_12_v3:1,251,244..1,253,532(-)
PBANKA_1232200	FACT-L	-0.194921	FACT complex subunit SPT16	PbANKA_12_v3:1,246,975..1,250,509(+)
PBANKA_1231900	null	-0.194921	conserved Plasmodium protein, unknown function	PbANKA_12_v3:1,236,072..1,237,478(-)
PBANKA_1229900	null	-0.194921	conserved Plasmodium protein, unknown function	PbANKA_12_v3:1,154,700..1,156,995(+)
PBANKA_1229200	null	-0.194921	60S ribosomal protein L19, putative	PbANKA_12_v3:1,136,286..1,137,332(-)
PBANKA_1228400	null	-0.194921	mannose-6-phosphate isomerase, putative	PbANKA_12_v3:1,106,549..1,108,993(+)
PBANKA_1228200	GDH3	-0.194921	glutamate dehydrogenase, putative	PbANKA_12_v3:1,082,894..1,086,532(-)
PBANKA_1227900	PWP2	-0.194921	periodic tryptophan protein 2, putative	PbANKA_12_v3:1,067,204..1,070,500(+)
PBANKA_1226900	null	-0.194921	mitogen-activated protein kinase organizer 1, putative	PbANKA_12_v3:1,031,888..1,033,795(-)
PBANKA_1226800	RAD54	-0.194921	DNA repair and recombination protein RAD54, putative	PbANKA_12_v3:1,027,444..1,030,590(-)
PBANKA_1226300	null	-0.194921	zinc finger protein, putative	PbANKA_12_v3:1,008,384..1,010,504(-)
PBANKA_1225300	null	-0.194921	conserved Plasmodium protein, unknown function	PbANKA_12_v3:961,223..964,282(+)
PBANKA_1224900	null	-0.194921	conserved Plasmodium protein, unknown function	PbANKA_12_v3:940,478..942,226(+)
PBANKA_1223600	null	-0.194921	YEATS domain-containing protein, putative	PbANKA_12_v3:892,389..893,881(-)
PBANKA_1223400	null	-0.194921	conserved Plasmodium protein, unknown function	PbANKA_12_v3:885,601..887,000(-)
PBANKA_1223200	COQ10	-0.194921	coenzyme Q-binding protein COQ10 homolog, mitochondrial, putative	PbANKA_12_v3:879,365..880,681(-)
PBANKA_1222600	null	-0.194921	AP-3 complex subunit delta, putative	PbANKA_12_v3:857,508..861,857(-)
PBANKA_1222400	null	-0.194921	ubiquitin regulatory protein, putative	PbANKA_12_v3:850,696..851,820(-)
PBANKA_1222300	SEC28	-0.194921	coatomer subunit epsilon, putative	PbANKA_12_v3:848,218..849,616(-)
PBANKA_1222100	null	-0.194921	regulator of chromosome condensation, putative	PbANKA_12_v3:844,044..845,996(+)
PBANKA_1221500	RPL1	-0.194921	50S ribosomal protein L1, mitochondrial, putative	PbANKA_12_v3:825,302..826,402(+)
PBANKA_1221300	null	-0.194921	conserved Plasmodium protein, unknown function	PbANKA_12_v3:822,076..822,759(-)
PBANKA_1220900	null	-0.194921	conserved Plasmodium protein, unknown function	PbANKA_12_v3:813,505..814,479(-)
PBANKA_1220700	null	-0.194921	conserved Plasmodium protein, unknown function	PbANKA_12_v3:804,069..805,472(+)
PBANKA_1219300	HSP110c	-0.194921	heat shock protein 110, putative	PbANKA_12_v3:740,764..743,274(+)
PBANKA_1218600	null	-0.194921	conserved Plasmodium protein, unknown function	PbANKA_12_v3:715,956..716,795(+)
PBANKA_1218500	null	-0.194921	protein phosphatase inhibitor 2, putative	PbANKA_12_v3:711,833..713,323(-)
PBANKA_1217400	null	-0.194921	conserved Plasmodium protein, unknown function	PbANKA_12_v3:665,372..670,222(+)
PBANKA_1217200	null	-0.194921	conserved Plasmodium protein, unknown function	PbANKA_12_v3:657,836..660,883(+)
PBANKA_1216700	null	-0.194921	WD repeat-containing protein, putative	PbANKA_12_v3:630,514..637,698(-)
PBANKA_1216600	CARL	-0.194921	cyclic amine resistance locus protein, putative	PbANKA_12_v3:623,447..627,664(-)
PBANKA_1216400	null	-0.194921	mRNA-capping enzyme subunit beta, putative	PbANKA_12_v3:618,526..620,445(+)
PBANKA_1216100	null	-0.194921	regulator of initiation factor 2, putative	PbANKA_12_v3:605,964..608,432(-)
PBANKA_1215900	null	-0.194921	conserved Plasmodium protein, unknown function	PbANKA_12_v3:599,089..602,877(-)
PBANKA_1215200	null	-0.194921	conserved protein, unknown function	PbANKA_12_v3:574,320..575,543(-)
PBANKA_1215100	RIPR	-0.194921	Rh5 interacting protein, putative	PbANKA_12_v3:570,831..574,121(+)
PBANKA_1215000	SMN	-0.194921	survival motor neuron-like protein, putative	PbANKA_12_v3:567,759..569,154(-)
PBANKA_1214800	SART1	-0.194921	U4/U6.U5 tri-snRNP-associated protein 1, putative	PbANKA_12_v3:561,893..563,824(+)
PBANKA_1214500	null	-0.194921	conserved Plasmodium protein, unknown function	PbANKA_12_v3:550,042..550,773(-)
PBANKA_1214300	ENO	-0.194921	enolase, putative	PbANKA_12_v3:544,052..545,611(+)
PBANKA_1214100	null	-0.194921	tubulin binding cofactor c, putative	PbANKA_12_v3:537,582..539,538(-)
PBANKA_1213600	CysRS	-0.194921	cysteine--tRNA ligase, putative	PbANKA_12_v3:524,804..527,438(-)
PBANKA_1213500	null	-0.194921	CWC16 domain-containing protein, putative	PbANKA_12_v3:522,617..523,702(-)
PBANKA_1213100	null	-0.194921	prohibitin, putative	PbANKA_12_v3:506,262..507,113(+)
PBANKA_1212100	null	-0.194921	conserved Plasmodium protein, unknown function	PbANKA_12_v3:457,725..458,906(+)
PBANKA_1211300	ATG18	-0.194921	autophagy-related protein 18, putative	PbANKA_12_v3:416,933..418,179(-)
PBANKA_1211200	null	-0.194921	conserved Plasmodium protein, unknown function	PbANKA_12_v3:413,764..416,028(+)
PBANKA_1211100	NIF4	-0.194921	NLI interacting factor-like phosphatase	PbANKA_12_v3:408,798..412,918(+)
PBANKA_1210800	HGPRT	-0.194921	hypoxanthine-guanine phosphoribosyltransferase, putative	PbANKA_12_v3:398,943..400,099(-)
PBANKA_1210400	null	-0.194921	E3 ubiquitin-protein ligase, putative	PbANKA_12_v3:387,142..390,325(+)
PBANKA_1209800	null	-0.194921	proteasome subunit beta type-5, putative	PbANKA_12_v3:368,395..369,207(-)
PBANKA_1209700	ARV1	-0.194921	protein ARV1, putative	PbANKA_12_v3:366,014..367,813(+)
PBANKA_1209400	ISP1	-0.194921	inner membrane complex sub-compartment protein 1	PbANKA_12_v3:357,627..358,632(-)
PBANKA_1209300	null	-0.194921	conserved Plasmodium protein, unknown function	PbANKA_12_v3:355,181..356,774(+)
PBANKA_1209100	null	-0.194921	dolichyl-phosphate-mannose protein mannosyltransferase, putative	PbANKA_12_v3:351,411..352,936(+)
PBANKA_1208700	SDH4	-0.194921	succinate dehydrogenase subunit 4, putative	PbANKA_12_v3:343,460..344,317(+)
PBANKA_1208100	null	-0.194921	conserved Plasmodium protein, unknown function	PbANKA_12_v3:314,113..318,008(-)
PBANKA_1207300	DPH5	-0.194921	diphthine methyl ester synthase, putative	PbANKA_12_v3:294,482..295,306(+)
PBANKA_1206700	null	-0.194921	conserved Plasmodium protein, unknown function	PbANKA_12_v3:274,614..277,550(+)
PBANKA_1205400	null	-0.194921	rhoGAP GTPase, putative	PbANKA_12_v3:215,045..217,433(-)
PBANKA_1205200	null	-0.194921	conserved membrane protein, unknown function	PbANKA_12_v3:211,579..213,292(+)
PBANKA_1205100	null	-0.194921	PPPDE peptidase, putative	PbANKA_12_v3:208,970..210,438(+)
PBANKA_1205000	GBP2	-0.194921	single-strand telomeric DNA-binding protein GBP2, putative	PbANKA_12_v3:206,080..207,362(+)
PBANKA_1204800	PhLP1	-0.194921	phosducin-like protein, putative	PbANKA_12_v3:201,652..202,233(-)
PBANKA_1204700	null	-0.194921	conserved Plasmodium protein, unknown function	PbANKA_12_v3:200,436..201,296(+)
PBANKA_1204500	null	-0.194921	conserved Plasmodium protein, unknown function	PbANKA_12_v3:195,651..196,751(-)
PBANKA_1204300	NOT5	-0.194921	CCR4-NOT transcription complex subunit 5, putative	PbANKA_12_v3:188,944..190,110(-)
PBANKA_1204200	IMP4	-0.194921	IMP1-like protein, putative	PbANKA_12_v3:186,055..187,479(-)
PBANKA_1203800	null	-0.194921	DnaJ protein, putative	PbANKA_12_v3:174,548..176,313(-)
PBANKA_1203100	null	-0.194921	ADP/ATP carrier protein, putative	PbANKA_12_v3:154,768..156,193(+)
PBANKA_1202700	null	-0.194921	RNA-binding protein, putative	PbANKA_12_v3:141,074..143,221(-)
PBANKA_1202400	null	-0.194921	60S ribosomal protein L13, putative	PbANKA_12_v3:121,918..122,884(-)
PBANKA_1202200	null	-0.194921	U5 small nuclear ribonuclear protein, putative	PbANKA_12_v3:115,270..118,851(-)
PBANKA_1202100	null	-0.194921	MKT1 domain-containing protein, putative	PbANKA_12_v3:109,038..112,478(-)
PBANKA_1201900	null	-0.194921	40S ribosomal protein S20e, putative	PbANKA_12_v3:103,295..104,183(-)
PBANKA_1201000	null	-0.194921	conserved Plasmodium protein, unknown function	PbANKA_12_v3:70,190..71,743(+)
PBANKA_1139000	null	-0.194921	conserved Plasmodium protein, unknown function	PbANKA_11_v3:1,482,059..1,485,421(+)
PBANKA_1138800	null	-0.194921	conserved Plasmodium protein, unknown function	PbANKA_11_v3:1,469,598..1,475,894(+)
PBANKA_1138000	null	-0.194921	conserved Plasmodium protein, unknown function	PbANKA_11_v3:1,439,323..1,439,919(+)
PBANKA_1137500	ADF2	-0.194921	actin-depolymerizing factor 2	PbANKA_11_v3:1,419,861..1,420,399(-)
PBANKA_1137200	SEC24A	-0.194921	protein transport protein Sec24A, putative	PbANKA_11_v3:1,405,856..1,409,543(+)
PBANKA_1137000	BLN	-0.194921	bergheilysin	PbANKA_11_v3:1,396,544..1,399,993(+)
PBANKA_1136400	EMC3	-0.194921	ER membrane protein complex subunit 3, putative	PbANKA_11_v3:1,370,190..1,371,609(-)
PBANKA_1136300	null	-0.194921	RNA-binding protein, putative	PbANKA_11_v3:1,368,206..1,369,429(-)
PBANKA_1135800	null	-0.194921	conserved Plasmodium protein, unknown function	PbANKA_11_v3:1,345,777..1,346,268(+)
PBANKA_1135700	CELF1	-0.194921	CUGBP Elav-like family member 1, putative	PbANKA_11_v3:1,341,209..1,342,895(-)
PBANKA_1134200	null	-0.194921	pyrroline-5-carboxylate reductase, putative	PbANKA_11_v3:1,281,534..1,283,041(+)
PBANKA_1133800	null	-0.194921	DNA helicase, putative	PbANKA_11_v3:1,267,773..1,270,376(+)
PBANKA_1133700	null	-0.194921	conserved Plasmodium protein, unknown function	PbANKA_11_v3:1,263,353..1,266,457(+)
PBANKA_1133000	null	-0.194921	DnaJ protein, putative	PbANKA_11_v3:1,235,298..1,236,625(+)
PBANKA_1132900	null	-0.194921	regulator of chromosome condensation, putative	PbANKA_11_v3:1,231,635..1,233,074(-)
PBANKA_1132400	null	-0.194921	conserved Plasmodium protein, unknown function	PbANKA_11_v3:1,215,365..1,218,181(-)
PBANKA_1132300	null	-0.194921	conserved Plasmodium protein, unknown function	PbANKA_11_v3:1,210,642..1,214,559(+)
PBANKA_1132000	NIF3	-0.194921	NLI interacting factor-like phosphatase	PbANKA_11_v3:1,197,389..1,200,823(-)
PBANKA_1131900	PP5	-0.194921	serine/threonine protein phosphatase 5	PbANKA_11_v3:1,194,183..1,196,318(+)
PBANKA_1131800	null	-0.194921	histone-lysine N-methyltransferase, putative	PbANKA_11_v3:1,190,188..1,191,723(+)
PBANKA_1131700	null	-0.194921	RAP protein, putative	PbANKA_11_v3:1,186,604..1,189,192(-)
PBANKA_1131600	MCM6	-0.194921	DNA replication licensing factor MCM6, putative	PbANKA_11_v3:1,183,549..1,186,371(+)
PBANKA_1131200	null	-0.194921	60S ribosomal protein L7-2, putative	PbANKA_11_v3:1,172,766..1,173,854(-)
PBANKA_1129500	null	-0.194921	bifunctional methylenetetrahydrofolate dehydrogenase/cyclohydrolase, putative	PbANKA_11_v3:1,122,152..1,124,164(+)
PBANKA_1129400	null	-0.194921	conserved protein, unknown function	PbANKA_11_v3:1,118,110..1,120,765(+)
PBANKA_1129100	null	-0.194921	DNA polymerase epsilon catalytic subunit A, putative	PbANKA_11_v3:1,100,203..1,109,102(-)
PBANKA_1129000	PSOP6	-0.194921	secreted ookinete protein, putative	PbANKA_11_v3:1,098,550..1,099,663(+)
PBANKA_1128200	null	-0.194921	RNA-binding protein, putative	PbANKA_11_v3:1,056,146..1,057,681(+)
PBANKA_1128100	PL	-0.194921	phospholipase	PbANKA_11_v3:1,051,220..1,053,475(+)
PBANKA_1127700	NAPRT	-0.194921	nicotinate phosphoribosyltransferase, putative	PbANKA_11_v3:1,038,124..1,040,193(-)
PBANKA_1127600	null	-0.194921	N-acetyltransferase, putative	PbANKA_11_v3:1,036,621..1,037,505(-)
PBANKA_1127500	GATB	-0.194921	glutamyl-tRNA(Gln) amidotransferase subunit B, putative	PbANKA_11_v3:1,032,992..1,035,103(-)
PBANKA_1127400	null	-0.194921	conserved Plasmodium protein, unknown function	PbANKA_11_v3:1,030,774..1,032,483(+)
PBANKA_1127100	null	-0.194921	conserved Plasmodium protein, unknown function	PbANKA_11_v3:1,023,717..1,025,896(+)
PBANKA_1127000	CEPT	-0.194921	choline/ethanolaminephosphotransferase	PbANKA_11_v3:1,019,097..1,021,581(-)
PBANKA_1126700	null	-0.194921	6-pyruvoyltetrahydropterin synthase, putative	PbANKA_11_v3:978,230..978,748(+)
PBANKA_1126100	TIM22	-0.194921	mitochondrial import inner membrane translocase subunit TIM22, putative	PbANKA_11_v3:958,329..958,874(-)
PBANKA_1125700	null	-0.194921	mitochondrial ribosomal protein L46 precursor, putative	PbANKA_11_v3:944,667..945,785(+)
PBANKA_1125600	null	-0.194921	pyruvate kinase, putative	PbANKA_11_v3:940,783..943,039(+)
PBANKA_1125500	null	-0.194921	conserved protein, unknown function	PbANKA_11_v3:936,963..938,069(+)
PBANKA_1125000	null	-0.194921	conserved Plasmodium protein, unknown function	PbANKA_11_v3:922,121..923,278(-)
PBANKA_1124900	null	-0.194921	oxidoreductase, putative	PbANKA_11_v3:919,686..922,038(+)
PBANKA_1124800	null	-0.194921	conserved Plasmodium protein, unknown function	PbANKA_11_v3:913,952..918,523(-)
PBANKA_1124100	null	-0.194921	conserved Plasmodium protein, unknown function	PbANKA_11_v3:894,682..896,007(+)
PBANKA_1123500	ISWI	-0.194921	SNF2 helicase, putative	PbANKA_11_v3:869,771..877,463(+)
PBANKA_1123300	null	-0.194921	conserved Plasmodium protein, unknown function	PbANKA_11_v3:862,103..863,959(-)
PBANKA_1122400	SOD2	-0.194921	superoxide dismutase [Fe], putative	PbANKA_11_v3:830,623..832,597(-)
PBANKA_1122100	null	-0.194921	ferredoxin--NADP reductase, putative	PbANKA_11_v3:824,155..825,246(+)
PBANKA_1121800	AP2-SP3	-0.194921	AP2 domain transcription factor AP2-SP3	PbANKA_11_v3:804,384..810,671(-)
PBANKA_1121600	null	-0.194921	conserved Plasmodium protein, unknown function	PbANKA_11_v3:796,339..797,698(-)
PBANKA_1121500	QCR9	-0.194921	cytochrome b-c1 complex subunit 9, putative	PbANKA_11_v3:795,097..795,851(+)
PBANKA_1120700	null	-0.194921	nascent polypeptide-associated complex subunit alpha, putative	PbANKA_11_v3:773,172..773,956(+)
PBANKA_1120300	null	-0.194921	conserved Plasmodium protein, unknown function	PbANKA_11_v3:756,241..758,223(+)
PBANKA_1119700	null	-0.194921	cleavage stimulation factor subunit 1, putative	PbANKA_11_v3:739,041..740,762(+)
PBANKA_1119200	PSOP25	-0.194921	secreted ookinete protein 25	PbANKA_11_v3:726,869..727,921(-)
PBANKA_1119100	SF3A2	-0.194921	splicing factor 3A subunit 2, putative	PbANKA_11_v3:725,655..726,350(+)
PBANKA_1118700	ACS12	-0.194921	acyl-CoA synthetase, putative	PbANKA_11_v3:707,113..711,168(-)
PBANKA_1118400	null	-0.194921	conserved Plasmodium protein, unknown function	PbANKA_11_v3:687,034..690,354(+)
PBANKA_1118200	null	-0.194921	conserved protein, unknown function	PbANKA_11_v3:677,942..683,808(-)
PBANKA_1117200	null	-0.194921	conserved Plasmodium protein, unknown function	PbANKA_11_v3:651,041..653,497(+)
PBANKA_1116700	null	-0.194921	AP-2 complex subunit alpha, putative	PbANKA_11_v3:629,548..633,989(+)
PBANKA_1116000	TLP	-0.194921	TRAP-like protein	PbANKA_11_v3:609,101..612,325(+)
PBANKA_1114700	ROM9	-0.194921	rhomboid protease ROM9	PbANKA_11_v3:561,764..563,485(-)
PBANKA_1114200	null	-0.194921	ribose-5-phosphate isomerase, putative	PbANKA_11_v3:544,842..546,132(-)
PBANKA_1113500	RAB1a	-0.194921	ras-related protein Rab-1A, putative	PbANKA_11_v3:524,717..525,337(-)
PBANKA_1113300	null	-0.194921	deoxyribodipyrimidine photo-lyase, putative	PbANKA_11_v3:517,435..520,125(-)
PBANKA_1112000	null	-0.194921	conserved Plasmodium protein, unknown function	PbANKA_11_v3:480,784..481,458(+)
PBANKA_1111400	INO1	-0.194921	inositol-3-phosphate synthase, putative	PbANKA_11_v3:466,783..468,746(-)
PBANKA_1110200	null	-0.194921	conserved Plasmodium protein, unknown function	PbANKA_11_v3:408,394..409,422(+)
PBANKA_1110100	null	-0.194921	topoisomerase I, putative	PbANKA_11_v3:398,490..401,135(-)
PBANKA_1109500	null	-0.194921	conserved Plasmodium protein, unknown function	PbANKA_11_v3:373,907..374,911(+)
PBANKA_1109300	null	-0.194921	conserved Plasmodium protein, unknown function	PbANKA_11_v3:364,235..366,322(-)
PBANKA_1108300	PRP5	-0.194921	pre-mRNA-processing ATP-dependent RNA helicase PRP5, putative	PbANKA_11_v3:320,699..324,694(+)
PBANKA_1107900	TPT	-0.194921	triose phosphate transporter	PbANKA_11_v3:305,675..306,700(+)
PBANKA_1107000	null	-0.194921	conserved Plasmodium protein, unknown function	PbANKA_11_v3:274,184..274,645(-)
PBANKA_1106800	SUB3	-0.194921	subtilisin-like protease 3, putative	PbANKA_11_v3:267,464..269,242(-)
PBANKA_1106000	null	-0.194921	conserved Plasmodium protein, unknown function	PbANKA_11_v3:237,068..238,340(-)
PBANKA_1105400	SUMO	-0.194921	small ubiquitin-related modifier, putative	PbANKA_11_v3:228,137..228,625(-)
PBANKA_1105300	null	-0.194921	conserved Plasmodium protein, unknown function	PbANKA_11_v3:224,704..226,071(-)
PBANKA_1105100	MSH6	-0.194921	DNA mismatch repair protein MSH6, putative	PbANKA_11_v3:216,378..220,076(-)
PBANKA_1104900	null	-0.194921	UDP-N-acetylglucosamine transporter, putative	PbANKA_11_v3:211,028..212,674(+)
PBANKA_1103500	null	-0.194921	conserved Plasmodium protein, unknown function	PbANKA_11_v3:148,224..150,079(-)
PBANKA_1103100	ADF1	-0.194921	actin-depolymerizing factor 1	PbANKA_11_v3:137,069..137,623(+)
PBANKA_1103000	SRSF12	-0.194921	serine/arginine-rich splicing factor 12, putative	PbANKA_11_v3:133,135..134,088(-)
PBANKA_1102300	null	-0.194921	conserved Plasmodium protein, unknown function	PbANKA_11_v3:114,307..117,738(-)
PBANKA_1101600	null	-0.194921	chromosome assembly factor 1, putative	PbANKA_11_v3:94,187..96,940(+)
PBANKA_1039900	null	-0.194921	conserved Plasmodium protein, unknown function	PbANKA_10_v3:1,589,379..1,592,837(+)
PBANKA_1039400	null	-0.194921	ubiquitin-40S ribosomal protein S27a, putative	PbANKA_10_v3:1,575,710..1,576,830(+)
PBANKA_1039200	null	-0.194921	conserved Plasmodium protein, unknown function	PbANKA_10_v3:1,568,016..1,569,164(-)
PBANKA_1037000	BET5	-0.194921	trafficking protein particle complex subunit 1, putative	PbANKA_10_v3:1,498,692..1,499,561(-)
PBANKA_1036900	null	-0.194921	conserved Plasmodium protein, unknown function	PbANKA_10_v3:1,495,698..1,498,475(-)
PBANKA_1035900	GDPD	-0.194921	glycerophosphodiester phosphodiesterase, putative	PbANKA_10_v3:1,456,241..1,457,620(-)
PBANKA_1035600	ClpC	-0.194921	ATP-dependent Clp protease regulatory subunit ClpC, putative	PbANKA_10_v3:1,443,468..1,446,854(-)
PBANKA_1035500	VPS29	-0.194921	vacuolar protein sorting-associated protein 29, putative	PbANKA_10_v3:1,441,965..1,442,540(-)
PBANKA_1015300	null	-0.194921	rRNA (adenosine-2'-O-)-methyltransferase, putative	PbANKA_10_v3:665,274..672,194(-)
PBANKA_1015200	DPH2	-0.194921	diphthamide biosynthesis protein 2, putative	PbANKA_10_v3:662,822..664,798(-)
PBANKA_1015000	null	-0.194921	mitochondrial ribosomal protein L15 precursor, putative	PbANKA_10_v3:659,757..660,800(+)
PBANKA_1014800	WRN	-0.194921	ADP-dependent DNA helicase RecQ, putative	PbANKA_10_v3:648,802..652,728(-)
PBANKA_1013700	null	-0.194921	mitochondrial ribosomal protein L17-2 precursor, putative	PbANKA_10_v3:618,228..619,190(+)
PBANKA_1013600	null	-0.194921	conserved Plasmodium protein, unknown function	PbANKA_10_v3:616,220..617,158(-)
PBANKA_1013200	null	-0.194921	succinyl-CoA ligase [ADP-forming] subunit beta, putative	PbANKA_10_v3:602,622..603,998(-)
PBANKA_1012400	null	-0.194921	RNA methyltransferase, putative	PbANKA_10_v3:568,836..570,446(-)
PBANKA_1011600	null	-0.194921	chromatin assembly factor 1 P55 subunit, putative	PbANKA_10_v3:545,257..547,014(-)
PBANKA_1011400	TOP2	-0.194921	DNA topoisomerase 2, putative	PbANKA_10_v3:522,597..527,396(+)
PBANKA_1011300	SPC1	-0.194921	signal peptidase complex subunit SPC1, putative	PbANKA_10_v3:518,681..519,292(-)
PBANKA_1010800	CAF16	-0.194921	CCR4-associated factor 16, putative	PbANKA_10_v3:495,037..496,551(+)
PBANKA_1010200	METAP2	-0.194921	methionine aminopeptidase 2, putative	PbANKA_10_v3:458,431..460,146(-)
PBANKA_1009800	COX15	-0.194921	cytochrome c oxidase assembly protein COX15, putative	PbANKA_10_v3:449,488..450,789(-)
PBANKA_1009200	null	-0.194921	conserved Plasmodium protein, unknown function	PbANKA_10_v3:422,856..427,697(+)
PBANKA_1008300	null	-0.194921	GTP-binding protein, putative	PbANKA_10_v3:381,201..382,436(-)
PBANKA_1007600	EVP1	-0.194921	erythrocyte vesicle protein 1, putative	PbANKA_10_v3:356,610..358,735(-)
PBANKA_1007400	null	-0.194921	zinc finger protein, putative	PbANKA_10_v3:351,710..353,284(+)
PBANKA_1007000	null	-0.194921	chaperone protein DnaJ, putative	PbANKA_10_v3:339,190..341,058(+)
PBANKA_1006800	SOF1	-0.194921	protein SOF1, putative	PbANKA_10_v3:332,806..334,221(+)
PBANKA_1006500	KAE1	-0.194921	tRNA N6-adenosine threonylcarbamoyltransferase, putative	PbANKA_10_v3:319,611..322,157(+)
PBANKA_1006300	PLP1	-0.194921	perforin-like protein 1	PbANKA_10_v3:312,525..316,059(-)
PBANKA_1006100	FEN1	-0.194921	flap endonuclease 1, putative	PbANKA_10_v3:303,953..305,392(-)
PBANKA_1005800	null	-0.194921	conserved Plasmodium protein, unknown function	PbANKA_10_v3:295,977..297,404(+)
PBANKA_1004000	cGloII	-0.194921	cytosolic glyoxalase II, putative	PbANKA_10_v3:232,788..234,603(+)
PBANKA_1003800	null	-0.194921	V-type proton ATPase subunit B, putative	PbANKA_10_v3:226,677..228,317(-)
PBANKA_1002900	null	-0.194921	ag-1 blood stage membrane protein homologue	PbANKA_10_v3:179,420..182,167(+)
PBANKA_1002700	DDX51	-0.194921	ATP-dependent RNA helicase DDX51, putative	PbANKA_10_v3:168,063..170,286(-)
PBANKA_1002500	null	-0.194921	conserved Plasmodium protein, unknown function	PbANKA_10_v3:162,389..164,357(-)
PBANKA_1002000	null	-0.194921	conserved Plasmodium protein, unknown function	PbANKA_10_v3:132,916..136,098(-)
PBANKA_1001500	null	-0.194921	alpha/beta hydrolase, putative	PbANKA_10_v3:106,618..108,693(-)
PBANKA_1001200	null	-0.194921	conserved Plasmodium protein, unknown function	PbANKA_10_v3:89,790..92,705(+)
PBANKA_1001100	null	-0.194921	ubiquitin specific protease, putative	PbANKA_10_v3:87,146..88,306(+)
PBANKA_1000900	null	-0.194921	conserved Plasmodium protein, unknown function	PbANKA_10_v3:73,156..74,160(-)
PBANKA_0920700	null	-0.194921	conserved Plasmodium protein, unknown function	PbANKA_09_v3:763,560..765,264(+)
PBANKA_0920300	null	-0.194921	conserved Plasmodium protein, unknown function	PbANKA_09_v3:745,515..748,222(-)
PBANKA_0919900	PFK11	-0.194921	ATP-dependent 6-phosphofructokinase, putative	PbANKA_09_v3:737,188..741,888(+)
PBANKA_0919800	GGPPS	-0.194921	geranylgeranyl pyrophosphate synthase, putative	PbANKA_09_v3:734,076..736,486(+)
PBANKA_0919600	NOT2	-0.194921	CCR4-NOT transcription complex subunit 2, putative	PbANKA_09_v3:728,225..730,222(+)
PBANKA_0919500	GPI8	-0.194921	GPI-anchor transamidase, putative	PbANKA_09_v3:724,399..725,787(-)
PBANKA_0919000	RPN7	-0.194921	26S proteasome regulatory subunit RPN7, putative	PbANKA_09_v3:709,116..710,987(-)
PBANKA_0918700	null	-0.194921	A/G-specific adenine glycosylase, putative	PbANKA_09_v3:696,116..698,543(-)
PBANKA_0918500	null	-0.194921	conserved Plasmodium protein, unknown function	PbANKA_09_v3:690,220..690,750(+)
PBANKA_0917800	COG2	-0.194921	conserved oligomeric Golgi complex subunit 2, putative	PbANKA_09_v3:667,362..671,214(-)
PBANKA_0916500	null	-0.194921	conserved Plasmodium protein, unknown function	PbANKA_09_v3:623,708..625,864(+)
PBANKA_0916100	null	-0.194921	nucleic acid binding protein, putative	PbANKA_09_v3:607,834..608,655(-)
PBANKA_0915900	null	-0.194921	amino acid transporter, putative	PbANKA_09_v3:597,893..601,921(-)
PBANKA_0915100	null	-0.194921	LEM3/CDC50 family protein, putative	PbANKA_09_v3:576,974..578,095(-)
PBANKA_0913100	null	-0.194921	conserved Plasmodium protein, unknown function	PbANKA_09_v3:498,541..500,153(+)
PBANKA_0912000	null	-0.194921	conserved Plasmodium protein, unknown function	PbANKA_09_v3:446,373..449,447(-)
PBANKA_0911700	SUB2	-0.194921	subtilisin-like protease 2	PbANKA_09_v3:433,109..436,937(-)
PBANKA_0911200	null	-0.194921	apicoplast ribosomal protein S14p/S29e precursor, putative	PbANKA_09_v3:419,786..420,467(+)
PBANKA_0911100	null	-0.194921	conserved Plasmodium protein, unknown function	PbANKA_09_v3:417,615..418,987(+)
PBANKA_0911000	null	-0.194921	calcium-binding protein, putative	PbANKA_09_v3:414,799..416,976(-)
PBANKA_0910400	null	-0.194921	conserved Plasmodium protein, unknown function	PbANKA_09_v3:396,653..397,084(+)
PBANKA_0909400	null	-0.194921	conserved Plasmodium protein, unknown function	PbANKA_09_v3:326,383..328,167(-)
PBANKA_0909000	CA	-0.194921	carbonic anhydrase, putative	PbANKA_09_v3:312,178..314,267(-)
PBANKA_0908100	null	-0.194921	conserved Plasmodium protein, unknown function	PbANKA_09_v3:272,822..278,725(+)
PBANKA_0907900	null	-0.194921	conserved Plasmodium protein, unknown function	PbANKA_09_v3:260,352..266,834(-)
PBANKA_0907700	null	-0.194921	conserved Plasmodium protein, unknown function	PbANKA_09_v3:254,846..257,847(+)
PBANKA_0907300	null	-0.194921	OTU domain-containing protein, putative	PbANKA_09_v3:246,278..247,648(-)
PBANKA_0907100	IMC1b	-0.194921	inner membrane complex protein 1b	PbANKA_09_v3:239,305..240,912(+)
PBANKA_0906600	CPO	-0.194921	coproporphyrinogen-III oxidase, putative	PbANKA_09_v3:215,254..216,895(+)
PBANKA_0906300	null	-0.194921	methyltransferase, putative	PbANKA_09_v3:208,096..209,700(+)
PBANKA_0906100	null	-0.194921	conserved Plasmodium protein, unknown function	PbANKA_09_v3:203,919..205,118(-)
PBANKA_0906000	null	-0.194921	alpha/beta hydrolase, putative	PbANKA_09_v3:201,895..202,941(-)
PBANKA_0905900	AP2-O	-0.194921	AP2 domain transcription factor AP2-O	PbANKA_09_v3:196,868..201,157(+)
PBANKA_0905300	null	-0.194921	conserved Plasmodium protein, unknown function	PbANKA_09_v3:178,400..181,580(-)
PBANKA_0905200	null	-0.194921	conserved Plasmodium protein, unknown function	PbANKA_09_v3:174,843..177,200(-)
PBANKA_0904800	null	-0.194921	conserved Plasmodium protein, unknown function	PbANKA_09_v3:168,674..169,646(+)
PBANKA_0904700	null	-0.194921	60S ribosomal protein L41, putative	PbANKA_09_v3:167,509..167,920(+)
PBANKA_0904600	null	-0.194921	conserved Plasmodium protein, unknown function	PbANKA_09_v3:161,941..165,516(-)
PBANKA_0904500	AOS1	-0.194921	SUMO-activating enzyme subunit 1, putative	PbANKA_09_v3:159,745..160,842(-)
PBANKA_0904000	null	-0.194921	conserved Plasmodium protein, unknown function	PbANKA_09_v3:148,049..150,473(+)
PBANKA_0903900	SEC21	-0.194921	coatomer subunit gamma, putative	PbANKA_09_v3:144,320..147,259(+)
PBANKA_0903300	null	-0.194921	bicoid-interacting protein BIN3, putative	PbANKA_09_v3:119,741..120,868(-)
PBANKA_0902600	LRR10	-0.194921	leucine-rich repeat protein	PbANKA_09_v3:101,503..102,417(-)
PBANKA_0902200	null	-0.194921	protein YIPF6, putative	PbANKA_09_v3:79,717..81,160(-)
PBANKA_0902000	null	-0.194921	dynein light chain, putative	PbANKA_09_v3:64,358..65,300(+)
PBANKA_0901400	null	-0.194921	ATP synthase subunit delta, mitochondrial, putative	PbANKA_09_v3:37,960..38,685(-)
PBANKA_0901300	MAEBL	-0.194921	membrane associated erythrocyte binding-like protein	PbANKA_09_v3:30,624..36,760(-)
PBANKA_0901100	null	-0.194921	serine/threonine protein kinase, putative	PbANKA_09_v3:23,761..27,708(+)
PBANKA_0835600	PKAc	-0.194921	cAMP-dependent protein kinase catalytic subunit	PbANKA_08_v3:1,313,185..1,315,004(+)
PBANKA_0835100	null	-0.194921	conserved Plasmodium protein, unknown function	PbANKA_08_v3:1,302,465..1,302,881(+)
PBANKA_0834800	null	-0.194921	histidine--tRNA ligase, putative	PbANKA_08_v3:1,295,111..1,296,772(-)
PBANKA_0834500	null	-0.194921	conserved Plasmodium protein, unknown function	PbANKA_08_v3:1,289,452..1,290,262(-)
PBANKA_0834400	MAS1	-0.194921	mitochondrial-processing peptidase subunit beta, putative	PbANKA_08_v3:1,286,317..1,287,756(-)
PBANKA_0834000	null	-0.194921	calcyclin-binding protein, putative	PbANKA_08_v3:1,274,538..1,276,174(-)
PBANKA_0833900	null	-0.194921	conserved Plasmodium protein, unknown function	PbANKA_08_v3:1,271,615..1,274,343(+)
PBANKA_0833200	RF1	-0.194921	peptide chain release factor 1, putative	PbANKA_08_v3:1,251,035..1,252,391(-)
PBANKA_0832500	null	-0.194921	PIH1 domain-containing protein, putative	PbANKA_08_v3:1,231,237..1,233,444(+)
PBANKA_0832400	null	-0.194921	conserved protein, unknown function	PbANKA_08_v3:1,229,750..1,230,627(+)
PBANKA_0831900	null	-0.194921	nucleolar protein Nop52, putative	PbANKA_08_v3:1,217,724..1,219,364(+)
PBANKA_0831600	null	-0.194921	conserved Plasmodium protein, unknown function	PbANKA_08_v3:1,209,204..1,210,466(-)
PBANKA_0830900	LRR8	-0.194921	leucine-rich repeat protein	PbANKA_08_v3:1,164,896..1,167,658(-)
PBANKA_0830600	null	-0.194921	conserved Plasmodium protein, unknown function	PbANKA_08_v3:1,157,840..1,158,844(+)
PBANKA_0830400	null	-0.194921	G2 protein	PbANKA_08_v3:1,152,377..1,153,316(-)
PBANKA_0829900	null	-0.194921	conserved Plasmodium protein, unknown function	PbANKA_08_v3:1,136,253..1,137,622(+)
PBANKA_0829200	null	-0.194921	conserved Plasmodium protein, unknown function	PbANKA_08_v3:1,120,387..1,121,058(+)
PBANKA_0828200	null	-0.194921	conserved Plasmodium protein, unknown function	PbANKA_08_v3:1,094,849..1,097,923(-)
PBANKA_0828100	FH	-0.194921	fumarate hydratase, putative	PbANKA_08_v3:1,092,627..1,094,654(+)
PBANKA_0828000	null	-0.194921	zinc finger protein, putative	PbANKA_08_v3:1,086,981..1,091,262(+)
PBANKA_0826800	null	-0.194921	protein kinase, putative	PbANKA_08_v3:1,028,097..1,032,455(+)
PBANKA_0826700	null	-0.194921	conserved Plasmodium protein, unknown function	PbANKA_08_v3:1,025,741..1,026,747(+)
PBANKA_0826300	TLP2	-0.194921	thioredoxin-like protein 2, putative	PbANKA_08_v3:1,012,066..1,012,974(+)
PBANKA_0826200	null	-0.194921	protein phosphatase-beta, putative	PbANKA_08_v3:1,008,377..1,009,915(-)
PBANKA_0826100	aPRS	-0.194921	proline--tRNA ligase, putative	PbANKA_08_v3:1,006,011..1,007,678(-)
PBANKA_0825300	null	-0.194921	conserved Plasmodium protein, unknown function	PbANKA_08_v3:979,947..982,001(+)
PBANKA_0825100	null	-0.194921	conserved Plasmodium protein, unknown function	PbANKA_08_v3:973,452..976,097(+)
PBANKA_0825000	null	-0.194921	conserved Plasmodium protein, unknown function	PbANKA_08_v3:970,513..972,303(-)
PBANKA_0824700	TRXR	-0.194921	thioredoxin reductase, putative	PbANKA_08_v3:957,403..959,331(-)
PBANKA_0824600	null	-0.194921	conserved protein, unknown function	PbANKA_08_v3:955,424..956,553(-)
PBANKA_0824500	LplA2	-0.194921	lipoate-protein ligase 2, putative	PbANKA_08_v3:953,956..955,119(+)
PBANKA_0824400	null	-0.194921	cyclin-dependent kinases regulatory subunit, putative	PbANKA_08_v3:952,313..953,307(+)
PBANKA_0824300	null	-0.194921	conserved Plasmodium protein, unknown function	PbANKA_08_v3:946,722..949,694(+)
PBANKA_0823600	PRP18	-0.194921	pre-mRNA-splicing factor 18, putative	PbANKA_08_v3:917,899..920,181(-)
PBANKA_0823500	null	-0.194921	glutamine synthetase, putative	PbANKA_08_v3:915,352..917,391(+)
PBANKA_0823300	null	-0.194921	para-aminobenzoic acid synthetase, putative	PbANKA_08_v3:908,359..911,650(+)
PBANKA_0823200	null	-0.194921	conserved Plasmodium protein, unknown function	PbANKA_08_v3:905,151..907,847(+)
PBANKA_0822700	RPF1	-0.194921	ribosome production factor 1, putative	PbANKA_08_v3:887,128..888,484(-)
PBANKA_0822600	null	-0.194921	conserved Plasmodium protein, unknown function	PbANKA_08_v3:884,607..886,664(-)
PBANKA_0822500	null	-0.194921	tetratricopeptide repeat protein, putative	PbANKA_08_v3:879,279..884,257(+)
PBANKA_0820000	null	-0.194921	DnaJ protein, putative	PbANKA_08_v3:799,426..801,231(+)
PBANKA_0819900	NAPS	-0.194921	nucleosome assembly protein	PbANKA_08_v3:794,165..795,597(-)
PBANKA_0819700	null	-0.194921	dihydrouridine synthase, putative	PbANKA_08_v3:786,330..787,925(-)
PBANKA_0819600	null	-0.194921	conserved Plasmodium protein, unknown function	PbANKA_08_v3:783,662..785,781(+)
PBANKA_0819450	TR	-0.194921	telomerase RNA	PbANKA_08_v3:776,467..777,913(+)
PBANKA_0819400	null	-0.194921	conserved Plasmodium protein, unknown function	PbANKA_08_v3:770,304..775,666(+)
PBANKA_0818000	MOP	-0.194921	merozoite organizing protein, putative	PbANKA_08_v3:724,441..729,969(-)
PBANKA_0817500	UFD1	-0.194921	ubiquitin fusion degradation protein 1, putative	PbANKA_08_v3:711,627..713,395(-)
PBANKA_0817400	null	-0.194921	conserved Plasmodium protein, unknown function	PbANKA_08_v3:705,381..711,038(+)
PBANKA_0816300	null	-0.194921	conserved Plasmodium protein, unknown function	PbANKA_08_v3:670,995..673,058(-)
PBANKA_0815400	null	-0.194921	conserved Plasmodium protein, unknown function	PbANKA_08_v3:646,035..647,377(+)
PBANKA_0815000	null	-0.194921	pseudouridylate synthase, putative	PbANKA_08_v3:630,346..632,640(+)
PBANKA_0814800	null	-0.194921	conserved Plasmodium protein, unknown function	PbANKA_08_v3:625,706..626,154(+)
PBANKA_0814500	null	-0.194921	protease, putative	PbANKA_08_v3:616,152..617,728(-)
PBANKA_0813600	null	-0.194921	conserved Plasmodium protein, unknown function	PbANKA_08_v3:594,451..597,601(+)
PBANKA_0813500	null	-0.194921	SAP domain-containing protein, putative	PbANKA_08_v3:591,721..593,628(+)
PBANKA_0813300	null	-0.194921	conserved Plasmodium protein, unknown function	PbANKA_08_v3:586,799..588,166(-)
PBANKA_0813000	ICP	-0.194921	inhibitor of cysteine proteases	PbANKA_08_v3:575,920..577,494(-)
PBANKA_0812900	null	-0.194921	conserved Plasmodium protein, unknown function	PbANKA_08_v3:574,033..574,809(-)
PBANKA_0812600	null	-0.194921	conserved Plasmodium protein, unknown function	PbANKA_08_v3:565,788..567,209(-)
PBANKA_0812000	null	-0.194921	DNA primase large subunit, putative	PbANKA_08_v3:535,771..537,570(-)
PBANKA_0811600	null	-0.194921	selenide water dikinase, putative	PbANKA_08_v3:523,818..526,850(-)
PBANKA_0811200	SET4	-0.194921	SET domain protein, putative	PbANKA_08_v3:500,882..504,142(-)
PBANKA_0811100	null	-0.194921	helicase SKI2W, putative	PbANKA_08_v3:496,480..500,571(+)
PBANKA_0810900	null	-0.194921	FHA domain protein, putative	PbANKA_08_v3:490,146..492,935(+)
PBANKA_0810500	ARP	-0.194921	apoptosis-related protein, putative	PbANKA_08_v3:474,225..475,390(-)
PBANKA_0810400	POFUT2	-0.194921	GDP-fucose protein O-fucosyltransferase 2, putative	PbANKA_08_v3:472,106..473,695(-)
PBANKA_0809800	null	-0.194921	ribosomal RNA methyltransferase, putative	PbANKA_08_v3:455,273..456,739(-)
PBANKA_0808900	ClpY	-0.194921	ATP-dependent protease ATPase subunit ClpY, putative	PbANKA_08_v3:424,487..426,814(-)
PBANKA_0808380	null	-0.194921	conserved Plasmodium protein, unknown function	PbANKA_08_v3:410,982..411,311(+)
PBANKA_0808300	null	-0.194921	E3 ubiquitin-protein ligase, putative	PbANKA_08_v3:408,388..410,080(+)
PBANKA_0807100	null	-0.194921	stomatin-like protein	PbANKA_08_v3:349,387..350,577(-)
PBANKA_0806800	null	-0.194921	conserved Plasmodium protein, unknown function	PbANKA_08_v3:331,061..334,868(+)
PBANKA_0806100	null	-0.194921	endonuclease/exonuclease/phosphatase family protein, putative	PbANKA_08_v3:294,160..296,634(+)
PBANKA_0806000	null	-0.194921	ubiquitin-conjugating enzyme E2, putative	PbANKA_08_v3:292,703..293,335(-)
PBANKA_0805500	null	-0.194921	conserved Plasmodium protein, unknown function	PbANKA_08_v3:272,570..275,655(-)
PBANKA_0804500	RAMA	-0.194921	rhoptry-associated membrane antigen, putative	PbANKA_08_v3:238,238..241,204(+)
PBANKA_0803800	null	-0.194921	conserved Plasmodium protein, unknown function	PbANKA_08_v3:207,866..208,176(+)
PBANKA_0803600	null	-0.194921	importin-7, putative	PbANKA_08_v3:197,199..200,882(+)
PBANKA_0803500	null	-0.194921	ATP synthase subunit C, putative	PbANKA_08_v3:194,748..195,763(-)
PBANKA_0803100	MCM7	-0.194921	DNA replication licensing factor MCM7, putative	PbANKA_08_v3:172,519..175,002(-)
PBANKA_0802800	null	-0.194921	conserved Plasmodium protein, unknown function	PbANKA_08_v3:160,362..163,097(+)
PBANKA_0801500	null	-0.194921	conserved Plasmodium protein, unknown function	PbANKA_08_v3:68,780..71,017(+)
PBANKA_0800900	null	-0.194921	conserved Plasmodium protein, unknown function	PbANKA_08_v3:44,081..47,749(-)
PBANKA_0800600	null	-0.194921	centrin, putative	PbANKA_08_v3:34,583..35,472(-)
PBANKA_0720200	null	-0.194921	conserved Plasmodium protein, unknown function	PbANKA_07_v3:739,374..742,547(-)
PBANKA_0719800	null	-0.194921	conserved Plasmodium protein, unknown function	PbANKA_07_v3:715,757..717,811(+)
PBANKA_0719700	null	-0.194921	conserved Plasmodium protein, unknown function	PbANKA_07_v3:711,743..714,589(-)
PBANKA_0719300	DHFR-TS	-0.194921	bifunctional dihydrofolate reductase-thymidylate synthase, putative	PbANKA_07_v3:686,685..688,448(+)
PBANKA_0717700	null	-0.194921	conserved Plasmodium protein, unknown function	PbANKA_07_v3:638,910..640,223(-)
PBANKA_0717500	CBP20	-0.194921	nuclear cap-binding protein subunit 2, putative	PbANKA_07_v3:636,156..636,964(+)
PBANKA_0717400	null	-0.194921	coatomer subunit zeta, putative	PbANKA_07_v3:634,615..635,274(-)
PBANKA_0717200	null	-0.194921	conserved Plasmodium protein, unknown function	PbANKA_07_v3:623,759..628,555(-)
PBANKA_0716900	ARO	-0.194921	armadillo-domain containing rhoptry protein, putative	PbANKA_07_v3:618,110..620,199(+)
PBANKA_0716600	APH	-0.194921	acylated pleckstrin-homology domain-containing protein, putative	PbANKA_07_v3:611,932..612,807(-)
PBANKA_0716500	null	-0.194921	RNA-binding protein, putative	PbANKA_07_v3:609,015..610,831(-)
PBANKA_0715400	null	-0.194921	conserved Apicomplexan protein, unknown function	PbANKA_07_v3:572,719..573,304(+)
PBANKA_0715200	EIF3G	-0.194921	eukaryotic translation initiation factor 3 subunit G, putative	PbANKA_07_v3:567,744..569,834(+)
PBANKA_0715100	null	-0.194921	ubiquitin, putative	PbANKA_07_v3:565,524..566,716(+)
PBANKA_0714300	HSP20	-0.194921	small heat shock protein HSP20	PbANKA_07_v3:541,000..541,941(-)
PBANKA_0713300	null	-0.194921	protein kinase c inhibitor-like protein, putative	PbANKA_07_v3:508,673..510,011(-)
PBANKA_0712400	FCF1	-0.194921	rRNA-processing protein FCF1, putative	PbANKA_07_v3:475,835..476,615(+)
PBANKA_0711000	null	-0.194921	conserved Plasmodium protein, unknown function	PbANKA_07_v3:421,536..427,339(+)
PBANKA_0710700	null	-0.194921	conserved Plasmodium protein, unknown function	PbANKA_07_v3:410,168..411,716(+)
PBANKA_0710600	null	-0.194921	phosphatidylglycerophosphate synthase, putative	PbANKA_07_v3:407,168..408,958(+)
PBANKA_0710300	YIF1	-0.194921	protein transport protein YIF1, putative	PbANKA_07_v3:395,649..397,766(-)
PBANKA_0709700	PK1	-0.194921	protein kinase 1	PbANKA_07_v3:370,984..373,556(-)
PBANKA_0709600	null	-0.194921	conserved Plasmodium protein, unknown function	PbANKA_07_v3:368,595..369,257(-)
PBANKA_0709500	DHX36	-0.194921	ATP-dependent RNA helicase DHX36, putative	PbANKA_07_v3:365,789..368,355(+)
PBANKA_0709200	CLP1	-0.194921	polyribonucleotide 5'-hydroxyl-kinase Clp1, putative	PbANKA_07_v3:357,475..359,217(-)
PBANKA_0708700	MED7	-0.194921	mediator of RNA polymerase II transcription subunit 7, putative	PbANKA_07_v3:347,859..348,650(+)
PBANKA_0708600	null	-0.194921	quinone oxidoreductase, putative	PbANKA_07_v3:346,229..347,407(+)
PBANKA_0707900	TRP1	-0.194921	thrombospondin-related protein 1	PbANKA_07_v3:327,594..330,284(+)
PBANKA_0707100	IMC1i	-0.194921	inner membrane complex protein 1i	PbANKA_07_v3:296,800..298,284(+)
PBANKA_0706700	DTC	-0.194921	dicarboxylate/tricarboxylate carrier, putative	PbANKA_07_v3:288,025..288,984(-)
PBANKA_0706600	null	-0.194921	conserved Plasmodium protein, unknown function	PbANKA_07_v3:284,380..286,767(+)
PBANKA_0706500	null	-0.194921	exonuclease, putative	PbANKA_07_v3:282,153..283,373(-)
PBANKA_0705200	null	-0.194921	conserved Apicomplexan protein, unknown function	PbANKA_07_v3:241,755..242,851(-)
PBANKA_0704800	null	-0.194921	conserved Plasmodium protein, unknown function	PbANKA_07_v3:234,041..235,201(-)
PBANKA_0704700	null	-0.194921	conserved Plasmodium protein, unknown function	PbANKA_07_v3:230,803..232,266(-)
PBANKA_0704400	null	-0.194921	alpha/beta hydrolase, putative	PbANKA_07_v3:200,318..201,631(+)
PBANKA_0704200	null	-0.194921	dehydrodolichyl diphosphate synthetase, putative	PbANKA_07_v3:194,741..196,675(+)
PBANKA_0704100	UBE4B	-0.194921	ubiquitin conjugation factor E4 B, putative	PbANKA_07_v3:188,892..192,548(-)
PBANKA_0704000	null	-0.194921	SNARE protein, putative	PbANKA_07_v3:187,108..187,932(+)
PBANKA_0703800	null	-0.194921	conserved Plasmodium protein, unknown function	PbANKA_07_v3:179,485..181,953(-)
PBANKA_0703700	DBP10	-0.194921	ATP-dependent RNA helicase DBP10, putative	PbANKA_07_v3:175,716..178,931(+)
PBANKA_0703500	null	-0.194921	conserved Plasmodium protein, unknown function	PbANKA_07_v3:167,639..170,701(-)
PBANKA_0703100	null	-0.194921	conserved Plasmodium protein, unknown function	PbANKA_07_v3:157,435..161,936(+)
PBANKA_0702700	ROM3	-0.194921	rhomboid protease ROM3	PbANKA_07_v3:140,162..141,457(-)
PBANKA_0702400	null	-0.194921	conserved Plasmodium protein, unknown function	PbANKA_07_v3:131,004..132,629(+)
PBANKA_0701900	GAMA	-0.194921	GPI-anchored micronemal antigen, putative	PbANKA_07_v3:114,560..116,437(+)
PBANKA_0622800	null	-0.194921	conserved Plasmodium protein, unknown function	PbANKA_06_v3:914,920..917,518(-)
PBANKA_0622500	null	-0.194921	exonuclease I, putative	PbANKA_06_v3:904,782..907,418(-)
PBANKA_0622000	null	-0.194921	conserved Plasmodium protein, unknown function	PbANKA_06_v3:872,823..874,298(+)
PBANKA_0621900	PAM18	-0.194921	mitochondrial import inner membrane translocase subunit TIM14, putative	PbANKA_06_v3:871,703..872,142(+)
PBANKA_0621500	null	-0.194921	Rab GTPase activator and protein kinase, putative	PbANKA_06_v3:855,765..860,684(+)
PBANKA_0621300	null	-0.194921	conserved Plasmodium protein, unknown function	PbANKA_06_v3:844,027..849,515(+)
PBANKA_0620900	null	-0.194921	conserved Plasmodium protein, unknown function	PbANKA_06_v3:832,218..835,586(-)
PBANKA_0620700	null	-0.194921	conserved Plasmodium protein, unknown function	PbANKA_06_v3:827,241..828,643(+)
PBANKA_0620500	null	-0.194921	tRNAHis guanylyltransferase, putative	PbANKA_06_v3:823,342..824,349(-)
PBANKA_0619900	OLA1	-0.194921	Obg-like ATPase 1, putative	PbANKA_06_v3:810,245..811,647(+)
PBANKA_0619600	null	-0.194921	PelOta protein homologue, putative	PbANKA_06_v3:801,752..802,909(+)
PBANKA_0619400	null	-0.194921	V-type ATPase V0 subunit e, putative	PbANKA_06_v3:798,065..798,570(-)
PBANKA_0619000	null	-0.194921	conserved Plasmodium protein, unknown function	PbANKA_06_v3:787,294..789,588(+)
PBANKA_0618900	null	-0.194921	conserved Plasmodium protein, unknown function	PbANKA_06_v3:785,446..786,680(+)
PBANKA_0618500	null	-0.194921	conserved Plasmodium protein, unknown function	PbANKA_06_v3:767,196..774,957(+)
PBANKA_0618200	null	-0.194921	phosphoinositide-binding protein, putative	PbANKA_06_v3:755,618..762,228(+)
PBANKA_0617900	null	-0.194921	ferrodoxin reductase-like protein, putative	PbANKA_06_v3:747,589..749,643(+)
PBANKA_0617600	null	-0.194921	small subunit rRNA processing protein, putative	PbANKA_06_v3:743,330..744,193(-)
PBANKA_0616900	null	-0.194921	conserved Plasmodium protein, unknown function	PbANKA_06_v3:718,565..722,587(-)
PBANKA_0616700	NEK4	-0.194921	NIMA related kinase 4	PbANKA_06_v3:711,904..713,513(+)
PBANKA_0616400	null	-0.194921	conserved Plasmodium protein, unknown function	PbANKA_06_v3:705,586..707,067(-)
PBANKA_0616100	null	-0.194921	prefoldin subunit 3, putative	PbANKA_06_v3:696,071..697,390(+)
PBANKA_0615800	EST	-0.194921	exported serine/threonine protein kinase	PbANKA_06_v3:670,236..677,606(-)
PBANKA_0615600	null	-0.194921	thioredoxin-like protein	PbANKA_06_v3:648,569..650,591(-)
PBANKA_0614900	null	-0.194921	conserved Plasmodium protein, unknown function	PbANKA_06_v3:623,119..624,331(-)
PBANKA_0614800	null	-0.194921	conserved Plasmodium protein, unknown function	PbANKA_06_v3:620,075..622,744(+)
PBANKA_0614700	null	-0.194921	conserved Plasmodium membrane protein, unknown function	PbANKA_06_v3:617,102..619,367(+)
PBANKA_0614500	EIF3I	-0.194921	eukaryotic translation initiation factor 3 subunit I, putative	PbANKA_06_v3:611,263..612,498(-)
PBANKA_0614200	null	-0.194921	conserved Plasmodium protein, unknown function	PbANKA_06_v3:601,793..604,487(+)
PBANKA_0614100	null	-0.194921	transcription initiation factor IIA subunit 1, putative	PbANKA_06_v3:600,399..601,397(+)
PBANKA_0613700	null	-0.194921	RNA-binding protein, putative	PbANKA_06_v3:586,754..589,528(+)
PBANKA_0613600	null	-0.194921	phosphopantothenate--cysteine ligase, putative	PbANKA_06_v3:583,843..585,345(+)
PBANKA_0612800	null	-0.194921	DEAD box ATP-dependent RNA helicase, putative	PbANKA_06_v3:545,910..549,485(-)
PBANKA_0612700	null	-0.194921	conserved Plasmodium protein, unknown function	PbANKA_06_v3:543,843..545,624(+)
PBANKA_0611600	null	-0.194921	ribonucleoside-diphosphate reductase large subunit, putative	PbANKA_06_v3:509,994..512,749(+)
PBANKA_0610800	null	-0.194921	eukaryotic initiation factor 2a, putative	PbANKA_06_v3:484,623..486,515(+)
PBANKA_0610000	null	-0.194921	mitochondrial ribosomal protein S18 precursor, putative	PbANKA_06_v3:450,413..451,612(-)
PBANKA_0608000	PBGD	-0.194921	porphobilinogen deaminase	PbANKA_06_v3:386,419..387,735(+)
PBANKA_0607900	null	-0.194921	3',5'-cyclic nucleotide phosphodiesterase, putative	PbANKA_06_v3:382,560..385,617(+)
PBANKA_0607400	null	-0.194921	protein phosphatase, putative	PbANKA_06_v3:362,272..366,489(+)
PBANKA_0607000	null	-0.194921	conserved Plasmodium protein, unknown function	PbANKA_06_v3:345,940..350,322(-)
PBANKA_0606600	null	-0.194921	conserved Plasmodium protein, unknown function	PbANKA_06_v3:312,770..325,994(+)
PBANKA_0606200	null	-0.194921	blood stage antigen 41-3 precursor, putative	PbANKA_06_v3:303,504..305,541(-)
PBANKA_0604900	null	-0.194921	conserved Plasmodium protein, unknown function	PbANKA_06_v3:249,778..257,208(-)
PBANKA_0604600	null	-0.194921	conserved protein, unknown function	PbANKA_06_v3:237,659..241,177(-)
PBANKA_0604400	tGloII	-0.194921	targeted glyoxalase II, putative	PbANKA_06_v3:227,334..228,323(+)
PBANKA_0604300	null	-0.194921	conserved Plasmodium protein, unknown function	PbANKA_06_v3:223,498..225,431(-)
PBANKA_0603700	null	-0.194921	conserved Plasmodium protein, unknown function	PbANKA_06_v3:198,655..200,875(+)
PBANKA_0603300	null	-0.194921	conserved Plasmodium protein, unknown function	PbANKA_06_v3:188,330..190,769(-)
PBANKA_0603000	null	-0.194921	conserved Plasmodium protein, unknown function	PbANKA_06_v3:180,866..183,553(-)
PBANKA_0602400	MFS4	-0.194921	major facilitator superfamily domain-containing protein, putative	PbANKA_06_v3:164,121..167,192(+)
PBANKA_0602200	SRP14	-0.194921	signal recognition particle subunit SRP14, putative	PbANKA_06_v3:159,485..159,934(+)
PBANKA_0602000	ORC1	-0.194921	origin recognition complex subunit 1, putative	PbANKA_06_v3:154,898..158,014(+)
PBANKA_0601700	null	-0.194921	conserved Plasmodium protein, unknown function	PbANKA_06_v3:146,768..148,612(+)
PBANKA_0600900	null	-0.194921	conserved Plasmodium protein, unknown function	PbANKA_06_v3:99,080..100,064(-)
PBANKA_0600800	COX19	-0.194921	cytochrome c oxidase assembly protein COX19, putative	PbANKA_06_v3:97,292..97,924(-)
PBANKA_0506900	null	-0.194921	phospholipid scramblase, putative	PbANKA_05_v3:291,663..292,958(-)
PBANKA_0505900	null	-0.194921	conserved Plasmodium protein, unknown function	PbANKA_05_v3:223,927..241,236(-)
PBANKA_0504900	null	-0.194921	histone acetyltransferase, putative	PbANKA_05_v3:190,127..193,792(+)
PBANKA_0504700	null	-0.194921	ribosomal silencing factor RsfS, putative	PbANKA_05_v3:182,380..183,678(+)
PBANKA_0504600	RCM1	-0.194921	rRNA (cytosine-C(5))-methyltransferase, putative	PbANKA_05_v3:180,235..181,811(-)
PBANKA_0504500	null	-0.194921	cytoplasmic dynein intermediate chain, putative	PbANKA_05_v3:178,009..179,988(+)
PBANKA_0504400	null	-0.194921	conserved Plasmodium protein, unknown function	PbANKA_05_v3:173,716..176,514(-)
PBANKA_0504200	RBM34	-0.194921	RNA-binding protein 34, putative	PbANKA_05_v3:168,820..170,904(-)
PBANKA_0504000	null	-0.194921	tRNA methyltransferase, putative	PbANKA_05_v3:161,812..164,604(-)
PBANKA_0503400	null	-0.194921	conserved Plasmodium protein, unknown function	PbANKA_05_v3:132,988..133,713(+)
PBANKA_0503300	null	-0.194921	conserved Plasmodium protein, unknown function	PbANKA_05_v3:126,963..131,369(-)
PBANKA_0503200	null	-0.194921	eukaryotic translation initiation factor subunit eIF2A, putative	PbANKA_05_v3:119,803..126,263(+)
PBANKA_0503100	null	-0.194921	conserved Plasmodium protein, unknown function	PbANKA_05_v3:115,393..117,297(-)
PBANKA_0502900	null	-0.194921	conserved Plasmodium protein, unknown function	PbANKA_05_v3:110,248..111,888(+)
PBANKA_0502800	null	-0.194921	tRNA wybutosine-synthesizing protein, putative	PbANKA_05_v3:102,897..107,624(-)
PBANKA_0502700	null	-0.194921	PHF5-like protein, putative	PbANKA_05_v3:101,075..102,061(-)
PBANKA_0502300	null	-0.194921	tRNA pseudouridine synthase, putative	PbANKA_05_v3:84,710..86,146(+)
PBANKA_0502200	RPN5	-0.194921	26S proteasome regulatory subunit p55, putative	PbANKA_05_v3:82,118..83,709(+)
PBANKA_0502000	null	-0.194921	conserved Plasmodium protein, unknown function	PbANKA_05_v3:75,586..77,160(+)
PBANKA_0501800	null	-0.194921	conserved Plasmodium protein, unknown function	PbANKA_05_v3:69,538..70,311(+)
PBANKA_0501700	null	-0.194921	phosphomannomutase, putative	PbANKA_05_v3:65,922..67,621(-)
PBANKA_0501500	null	-0.194921	enoyl-CoA hydratase-related protein, putative	PbANKA_05_v3:60,539..62,366(+)
PBANKA_0501300	null	-0.194921	DNA polymerase delta catalytic subunit, putative	PbANKA_05_v3:53,651..56,944(+)
PBANKA_0417900	null	-0.194921	conserved Plasmodium protein, unknown function	PbANKA_04_v3:673,685..677,398(-)
PBANKA_0417800	null	-0.194921	conserved Plasmodium protein, unknown function	PbANKA_04_v3:667,839..672,309(-)
PBANKA_0417200	PH	-0.194921	PH domain-containing protein	PbANKA_04_v3:645,124..646,083(-)
PBANKA_0416800	null	-0.194921	ubiquitin specific protease, putative	PbANKA_04_v3:626,770..631,082(-)
PBANKA_0415900	null	-0.194921	conserved Plasmodium protein, unknown function	PbANKA_04_v3:570,131..570,841(-)
PBANKA_0415700	ATG3	-0.194921	autophagy-related protein 3, putative	PbANKA_04_v3:562,277..564,679(+)
PBANKA_0415600	null	-0.194921	conserved Plasmodium protein, unknown function	PbANKA_04_v3:556,650..559,821(-)
PBANKA_0415300	RNaseII	-0.194921	exoribonuclease II, putative	PbANKA_04_v3:540,178..544,860(+)
PBANKA_0415100	null	-0.194921	conserved Plasmodium protein, unknown function	PbANKA_04_v3:535,288..536,910(+)
PBANKA_0414900	null	-0.194921	dynein light intermediate chain 2, putative	PbANKA_04_v3:530,327..532,468(+)
PBANKA_0414400	FNT	-0.194921	formate-nitrite transporter, putative	PbANKA_04_v3:512,513..513,798(-)
PBANKA_0414300	NUF2	-0.194921	kinetochore protein NUF2, putative	PbANKA_04_v3:510,334..511,707(+)
PBANKA_0414200	null	-0.194921	conserved Plasmodium protein, unknown function	PbANKA_04_v3:506,032..508,635(-)
PBANKA_0413400	null	-0.194921	zinc finger protein, putative	PbANKA_04_v3:482,340..483,739(+)
PBANKA_0412500	null	-0.194921	conserved Plasmodium protein, unknown function	PbANKA_04_v3:449,951..452,687(+)
PBANKA_0412400	null	-0.194921	zinc finger protein, putative	PbANKA_04_v3:438,447..441,209(-)
PBANKA_0411800	null	-0.194921	vesicle transport v-SNARE protein, putative	PbANKA_04_v3:420,745..422,336(-)
PBANKA_0411600	null	-0.194921	conserved Plasmodium protein, unknown function	PbANKA_04_v3:414,205..417,078(-)
PBANKA_0411500	null	-0.194921	conserved Plasmodium protein, unknown function	PbANKA_04_v3:411,571..414,125(+)
PBANKA_0411100	null	-0.194921	conserved Plasmodium protein, unknown function	PbANKA_04_v3:399,444..401,429(-)
PBANKA_0410700	null	-0.194921	conserved Plasmodium protein, unknown function	PbANKA_04_v3:392,246..393,271(-)
PBANKA_0410650	null	-0.194921	conserved Plasmodium protein, unknown function	PbANKA_04_v3:390,315..391,601(+)
PBANKA_0410500	MFR3	-0.194921	major facilitator superfamily-related transporter, putative	PbANKA_04_v3:384,340..386,508(+)
PBANKA_0410200	null	-0.194921	tetratricopeptide repeat protein, putative	PbANKA_04_v3:373,190..376,222(-)
PBANKA_0410000	null	-0.194921	conserved Plasmodium protein, unknown function	PbANKA_04_v3:369,245..370,138(+)
PBANKA_0409900	null	-0.194921	conserved Plasmodium protein, unknown function	PbANKA_04_v3:366,592..368,562(-)
PBANKA_0409800	null	-0.194921	conserved protein, unknown function	PbANKA_04_v3:363,931..365,897(+)
PBANKA_0409600	null	-0.194921	dolichyl-diphosphooligosaccharide--protein glycosyltransferase subunit 1, putative	PbANKA_04_v3:356,704..359,288(+)
PBANKA_0409500	null	-0.194921	conserved Plasmodium protein, unknown function	PbANKA_04_v3:354,431..354,676(-)
PBANKA_0409300	null	-0.194921	phosphatidylinositol 3- and 4-kinase, putative	PbANKA_04_v3:336,850..340,161(-)
PBANKA_0408100	null	-0.194921	50S ribosomal protein L9, apicoplast, putative	PbANKA_04_v3:293,710..294,583(+)
PBANKA_0408000	null	-0.194921	conserved Plasmodium protein, unknown function	PbANKA_04_v3:287,998..292,864(-)
PBANKA_0405400	null	-0.194921	40S ribosomal protein S12, putative	PbANKA_04_v3:195,002..195,648(-)
PBANKA_0404700	GRX1	-0.194921	glutaredoxin 1, putative	PbANKA_04_v3:178,601..179,501(-)
PBANKA_0404200	null	-0.194921	ubiquitin-conjugating enzyme E2, putative	PbANKA_04_v3:164,544..165,224(-)
PBANKA_0403700	null	-0.194921	conserved Plasmodium protein, unknown function	PbANKA_04_v3:140,698..143,397(+)
PBANKA_0403300	null	-0.194921	conserved Plasmodium membrane protein, unknown function	PbANKA_04_v3:118,805..122,911(+)
PBANKA_0403200	CSP	-0.194921	circumsporozoite (CS) protein	PbANKA_04_v3:115,144..116,166(-)
PBANKA_0402900	null	-0.194921	conserved Plasmodium protein, unknown function	PbANKA_04_v3:107,475..111,140(+)
PBANKA_0402800	EHD	-0.194921	EH domain-containing protein, putative	PbANKA_04_v3:102,972..104,561(-)
PBANKA_0402400	null	-0.194921	IBR domain protein, putative	PbANKA_04_v3:91,125..92,846(+)
PBANKA_0401800	null	-0.194921	HAD superfamily protein, putative	PbANKA_04_v3:68,998..73,498(+)
PBANKA_0401600	NSF	-0.194921	N-ethylmaleimide-sensitive fusion protein, putative	PbANKA_04_v3:59,454..61,787(-)
PBANKA_0401400	null	-0.194921	conserved Plasmodium protein, unknown function	PbANKA_04_v3:47,796..49,220(-)
PBANKA_0401200	ABCB4	-0.194921	ABC transporter B family member 4, putative	PbANKA_04_v3:40,580..44,404(+)
PBANKA_0304400	MSP4/5	-0.194921	merozoite surface protein 4/5	PbANKA_03_v3:137,777..138,480(-)
PBANKA_0304000	AROM	-0.194921	pentafunctional AROM polypeptide, putative	PbANKA_03_v3:122,433..128,889(+)
PBANKA_0303300	null	-0.194921	conserved Plasmodium protein, unknown function	PbANKA_03_v3:100,992..102,851(+)
PBANKA_0303100	null	-0.194921	PCI domain-containing protein, putative	PbANKA_03_v3:95,592..96,947(+)
PBANKA_0303000	null	-0.194921	conserved Plasmodium protein, unknown function	PbANKA_03_v3:91,934..94,310(+)
PBANKA_0302800	null	-0.194921	conserved Plasmodium protein, unknown function	PbANKA_03_v3:87,712..89,648(-)
PBANKA_0302200	null	-0.194921	dynein light chain, putative	PbANKA_03_v3:72,431..73,227(-)
PBANKA_0302000	null	-0.194921	conserved Plasmodium protein, unknown function	PbANKA_03_v3:67,983..69,423(+)
PBANKA_0301900	null	-0.194921	conserved Plasmodium protein, unknown function	PbANKA_03_v3:59,868..65,258(-)
PBANKA_0301500	MAK16	-0.194921	protein MAK16, putative	PbANKA_03_v3:48,172..49,347(-)
PBANKA_0301200	ERCC1	-0.194921	ERCC1 nucleotide excision repair protein, putative	PbANKA_03_v3:41,130..41,777(+)
PBANKA_0300900	null	-0.194921	conserved Plasmodium protein, unknown function	PbANKA_03_v3:30,365..31,102(-)
PBANKA_0300800	OPP	-0.194921	octaprenyl pyrophosphate synthase, putative	PbANKA_03_v3:28,242..29,867(+)
PBANKA_0213800	null	-0.194921	conserved Plasmodium protein, unknown function	PbANKA_02_v3:508,715..511,213(-)
PBANKA_0213600	null	-0.194921	mRNA (N6-adenosine)-methyltransferase, putative	PbANKA_02_v3:503,640..506,075(+)
PBANKA_0213300	AOP	-0.194921	1-cys peroxiredoxin, putative	PbANKA_02_v3:496,254..497,156(+)
PBANKA_0213000	null	-0.194921	RNA-binding protein, putative	PbANKA_02_v3:482,223..484,809(-)
PBANKA_0212900	null	-0.194921	conserved Plasmodium protein, unknown function	PbANKA_02_v3:480,543..482,143(+)
PBANKA_0212500	null	-0.194921	conserved Plasmodium protein, unknown function	PbANKA_02_v3:466,326..466,832(+)
PBANKA_0212300	ALP3	-0.194921	actin-like protein, putative	PbANKA_02_v3:462,404..464,199(+)
PBANKA_0212100	null	-0.194921	eukaryotic translation initiation factor 2 subunit alpha, putative	PbANKA_02_v3:442,872..444,152(-)
PBANKA_0209400	PSTK	-0.194921	L-seryl-tRNA(Sec) kinase, putative	PbANKA_02_v3:327,499..329,659(-)
PBANKA_0209300	ARP1	-0.194921	actin-related protein	PbANKA_02_v3:324,794..326,996(+)
PBANKA_0209200	PIESP15	-0.194921	parasite-infected erythrocyte surface protein	PbANKA_02_v3:320,987..322,504(-)
PBANKA_0208900	null	-0.194921	StAR-related lipid transfer protein, putative	PbANKA_02_v3:312,305..313,630(+)
PBANKA_0208600	null	-0.194921	conserved protein, unknown function	PbANKA_02_v3:295,938..296,759(+)
PBANKA_0208400	MFR2	-0.194921	major facilitator superfamily-related transporter, putative	PbANKA_02_v3:288,951..290,825(-)
PBANKA_0208300	NPT1	-0.194921	novel putative transporter 1	PbANKA_02_v3:286,146..287,666(-)
PBANKA_0207800	null	-0.194921	conserved Plasmodium protein, unknown function	PbANKA_02_v3:275,979..276,968(+)
PBANKA_0207100	null	-0.194921	conserved Plasmodium protein, unknown function	PbANKA_02_v3:246,014..246,841(+)
PBANKA_0206300	CEN1	-0.194921	centrin-1, putative	PbANKA_02_v3:217,848..219,296(-)
PBANKA_0205400	null	-0.194921	proteasome subunit beta type-3, putative	PbANKA_02_v3:184,766..185,813(+)
PBANKA_0205300	null	-0.194921	conserved Plasmodium protein, unknown function	PbANKA_02_v3:181,697..183,685(-)
PBANKA_0204900	null	-0.194921	conserved Plasmodium protein, unknown function	PbANKA_02_v3:166,232..168,005(+)
PBANKA_0204700	null	-0.194921	conserved Plasmodium protein, unknown function	PbANKA_02_v3:158,791..161,234(-)
PBANKA_0204100	null	-0.194921	N-terminal acetyltransferase, putative	PbANKA_02_v3:145,808..146,458(+)
PBANKA_0204000	null	-0.194921	cold-shock protein, putative	PbANKA_02_v3:144,591..145,226(+)
PBANKA_0203200	null	-0.194921	bromodomain protein, putative	PbANKA_02_v3:124,260..127,716(-)
PBANKA_0203000	null	-0.194921	chromatin assembly factor 1 protein WD40 domain, putative	PbANKA_02_v3:115,741..117,081(+)
PBANKA_0202700	null	-0.194921	kinesin-8, putative	PbANKA_02_v3:104,935..109,753(+)
PBANKA_0202600	null	-0.194921	conserved Plasmodium protein, unknown function	PbANKA_02_v3:103,116..103,799(+)
PBANKA_0202300	null	-0.194921	UMP-CMP kinase, putative	PbANKA_02_v3:92,992..94,572(+)
PBANKA_0201900	null	-0.194921	conserved protein, unknown function	PbANKA_02_v3:85,816..86,292(+)
PBANKA_0201800	TatD	-0.194921	TatD-like deoxyribonuclease	PbANKA_02_v3:83,766..85,672(+)
PBANKA_0111300	null	-0.194921	conserved Plasmodium protein, unknown function	PbANKA_01_v3:438,265..440,094(-)
PBANKA_0111100	P12p	-0.194921	6-cysteine protein	PbANKA_01_v3:432,195..433,178(-)
PBANKA_0110200	null	-0.194921	lsm12, putative	PbANKA_01_v3:411,711..412,630(+)
PBANKA_0109700	SWIB	-0.194921	SWIB/MDM2 domain-containing protein, putative	PbANKA_01_v3:383,303..385,711(-)
PBANKA_0109600	null	-0.194921	conserved Apicomplexan protein, unknown function	PbANKA_01_v3:381,814..382,954(+)
PBANKA_0109500	ApiAP2	-0.194921	AP2 domain transcription factor, putative	PbANKA_01_v3:379,499..380,595(+)
PBANKA_0109300	null	-0.194921	SNARE associated Golgi protein, putative	PbANKA_01_v3:375,602..376,720(-)
PBANKA_0108300	DHHC2	-0.194921	palmitoyltransferase DHHC2	PbANKA_01_v3:343,077..344,303(-)
PBANKA_0108200	null	-0.194921	conserved Plasmodium protein, unknown function	PbANKA_01_v3:337,150..342,054(+)
PBANKA_0107900	null	-0.194921	conserved Plasmodium protein, unknown function	PbANKA_01_v3:324,834..327,357(+)
PBANKA_0107800	null	-0.194921	citrate synthase-like protein, putative	PbANKA_01_v3:322,206..323,736(+)
PBANKA_0107700	ZIP1	-0.194921	zinc transporter ZIP1	PbANKA_01_v3:318,879..320,670(-)
PBANKA_0107600	null	-0.194921	conserved Plasmodium protein, unknown function	PbANKA_01_v3:301,998..318,320(+)
PBANKA_0106900	null	-0.194921	conserved Plasmodium protein, unknown function	PbANKA_01_v3:278,666..281,917(+)
PBANKA_0106000	null	-0.194921	G-protein associated signal transduction protein, putative	PbANKA_01_v3:244,883..248,217(-)
PBANKA_0105400	null	-0.194921	coatomer alpha subunit, putative	PbANKA_01_v3:224,533..229,071(+)
PBANKA_0104600	RAD50	-0.194921	DNA repair protein RAD50, putative	PbANKA_01_v3:188,330..193,927(-)
PBANKA_0104300	null	-0.194921	cyclin dependent kinase binding protein, putative	PbANKA_01_v3:176,651..178,580(-)
PBANKA_0104100	ARK1	-0.194921	serine/threonine protein kinase, putative	PbANKA_01_v3:173,897..175,356(+)
PBANKA_0104000	null	-0.194921	conserved Plasmodium protein, unknown function	PbANKA_01_v3:171,686..173,060(-)
PBANKA_0103700	null	-0.194921	conserved Plasmodium protein, unknown function	PbANKA_01_v3:163,005..163,640(-)
PBANKA_0103400	GILP	-0.194921	glyoxalase I, putative	PbANKA_01_v3:155,566..157,169(-)
PBANKA_0103100	null	-0.194921	conserved Plasmodium protein, unknown function	PbANKA_01_v3:141,669..143,660(+)
PBANKA_0103000	null	-0.194921	mitochondrial ribosomal protein L41, putative	PbANKA_01_v3:140,282..141,004(+)
PBANKA_0102900	SIP2	-0.194921	AP2 domain transcription factor, putative	PbANKA_01_v3:130,777..136,563(-)
PBANKA_0102700	null	-0.194921	conserved Plasmodium protein, unknown function	PbANKA_01_v3:122,663..123,781(-)
PBANKA_0102100	DHODH	-0.194921	dihydroorotate dehydrogenase, putative	PbANKA_01_v3:94,042..95,595(-)
PBANKA_0101900	null	-0.194921	RNA-binding protein, putative	PbANKA_01_v3:88,330..89,766(-)
PBANKA_0101000	null	-0.194921	MYND-type zinc finger protein, putative	PbANKA_01_v3:61,396..62,666(+)
PBANKA_0100800	null	-0.194921	conserved Plasmodium protein, unknown function	PbANKA_01_v3:47,559..51,707(-)
PBANKA_0214000	null	-0.228148	dynein heavy chain, putative	PbANKA_02_v3:514,747..530,043(+)
PBANKA_1463900	null	-0.248047	conserved Plasmodium protein, unknown function	PbANKA_14_v3:2,412,943..2,414,565(-)
PBANKA_1461000	null	-0.248047	methyltransferase, putative	PbANKA_14_v3:2,312,840..2,313,994(+)
PBANKA_1457700	PSOP26	-0.248047	conserved Plasmodium protein, unknown function	PbANKA_14_v3:2,216,114..2,218,438(-)
PBANKA_1457600	null	-0.248047	RNA-binding protein, putative	PbANKA_14_v3:2,212,112..2,215,754(+)
PBANKA_1457400	null	-0.248047	N-alpha-acetyltransferase 15, NatA auxiliary subunit, putative	PbANKA_14_v3:2,201,154..2,205,318(+)
PBANKA_1457300	null	-0.248047	glucose inhibited division protein a homologue, putative	PbANKA_14_v3:2,196,747..2,199,925(-)
PBANKA_1456800	SNF7	-0.248047	vacuolar-sorting protein SNF7, putative	PbANKA_14_v3:2,177,674..2,179,415(-)
PBANKA_1456400	null	-0.248047	SNARE protein, putative	PbANKA_14_v3:2,171,062..2,172,039(+)
PBANKA_1452600	null	-0.248047	calcyclin binding protein, putative	PbANKA_14_v3:2,024,480..2,025,160(-)
PBANKA_1451700	null	-0.248047	conserved Plasmodium protein, unknown function	PbANKA_14_v3:1,989,835..1,995,507(-)
PBANKA_1451400	null	-0.248047	protein-S-isoprenylcysteine O-methyltransferase, putative	PbANKA_14_v3:1,982,084..1,983,896(+)
PBANKA_1451000	null	-0.248047	conserved Plasmodium protein, unknown function	PbANKA_14_v3:1,972,700..1,974,751(+)
PBANKA_1450800	null	-0.248047	conserved Plasmodium protein, unknown function	PbANKA_14_v3:1,966,714..1,969,299(-)
PBANKA_1450500	XAB2	-0.248047	pre-mRNA-splicing factor SYF1, putative	PbANKA_14_v3:1,955,827..1,959,128(-)
PBANKA_1449200	TOC75	-0.248047	protein TOC75, putative	PbANKA_14_v3:1,903,238..1,906,159(-)
PBANKA_1447600	null	-0.248047	nucleotidyltransferase, putative	PbANKA_14_v3:1,823,362..1,826,247(-)
PBANKA_1446500	null	-0.248047	asparagine-rich protein, putative	PbANKA_14_v3:1,788,809..1,794,082(+)
PBANKA_1445600	RIO1	-0.248047	serine/threonine protein kinase RIO1, putative	PbANKA_14_v3:1,746,754..1,749,144(+)
PBANKA_1445400	SEC13	-0.248047	protein transport protein SEC13, putative	PbANKA_14_v3:1,739,873..1,742,022(+)
PBANKA_1444900	null	-0.248047	vacuolar transporter chaperone, putative	PbANKA_14_v3:1,726,464..1,729,546(+)
PBANKA_1444500	MyoD	-0.248047	myosin D, putative	PbANKA_14_v3:1,703,136..1,709,051(-)
PBANKA_1443100	null	-0.248047	conserved Plasmodium protein, unknown function	PbANKA_14_v3:1,644,641..1,648,068(+)
PBANKA_1442600	null	-0.248047	RNA pseudouridylate synthase, putative	PbANKA_14_v3:1,631,032..1,632,564(+)
PBANKA_1442500	ELP3	-0.248047	elongator complex protein 3, putative	PbANKA_14_v3:1,626,903..1,630,112(-)
PBANKA_1442100	null	-0.248047	conserved Plasmodium protein, unknown function	PbANKA_14_v3:1,589,683..1,593,174(+)
PBANKA_1438000	PKAr	-0.248047	cAMP-dependent protein kinase regulatory subunit, putative	PbANKA_14_v3:1,434,377..1,436,308(-)
PBANKA_1435400	null	-0.248047	conserved Plasmodium protein, unknown function	PbANKA_14_v3:1,328,312..1,335,005(-)
PBANKA_1434200	RRS	-0.248047	arginine--tRNA ligase, putative	PbANKA_14_v3:1,277,637..1,280,469(-)
PBANKA_1434100	null	-0.248047	conserved Plasmodium protein, unknown function	PbANKA_14_v3:1,272,151..1,276,119(-)
PBANKA_1433900	AP2-MU	-0.248047	AP-2 complex subunit mu, putative	PbANKA_14_v3:1,264,768..1,266,570(+)
PBANKA_1432900	null	-0.248047	GTP-binding protein, putative	PbANKA_14_v3:1,234,122..1,236,689(+)
PBANKA_1431700	null	-0.248047	serine--tRNA ligase, putative	PbANKA_14_v3:1,199,186..1,200,892(+)
PBANKA_1430100	null	-0.248047	geranylgeranyl transferase type2 beta subunit, putative	PbANKA_14_v3:1,160,815..1,162,583(-)
PBANKA_1429200	S20	-0.248047	conserved Plasmodium protein, unknown function	PbANKA_14_v3:1,134,353..1,136,104(-)
PBANKA_1428900	BDP2	-0.248047	bromodomain protein 2, putative	PbANKA_14_v3:1,124,423..1,127,395(-)
PBANKA_1427700	RUVB1	-0.248047	RuvB-like helicase 1, putative	PbANKA_14_v3:1,064,943..1,067,063(+)
PBANKA_1427200	PPM5	-0.248047	protein phosphatase PPM5	PbANKA_14_v3:1,049,870..1,052,492(+)
PBANKA_1426900	DBP1	-0.248047	ATP-dependent RNA helicase DBP1, putative	PbANKA_14_v3:1,035,477..1,038,206(-)
PBANKA_1426800	null	-0.248047	conserved Plasmodium protein, unknown function	PbANKA_14_v3:1,033,268..1,034,400(+)
PBANKA_1426200	CAF1	-0.248047	CCR4-associated factor 1, putative	PbANKA_14_v3:1,007,178..1,012,583(-)
PBANKA_1425800	null	-0.248047	conserved Plasmodium protein, unknown function	PbANKA_14_v3:989,142..992,537(-)
PBANKA_1425700	null	-0.248047	conserved Plasmodium protein, unknown function	PbANKA_14_v3:987,087..988,631(+)
PBANKA_1424000	null	-0.248047	PUB domain-containing protein, putative	PbANKA_14_v3:923,805..925,349(+)
PBANKA_1423900	null	-0.248047	translation initiation factor SUI1, putative	PbANKA_14_v3:920,842..922,117(-)
PBANKA_1422500	null	-0.248047	RAP protein, putative	PbANKA_14_v3:883,076..885,592(-)
PBANKA_1420900	DHHC4	-0.248047	palmitoyltransferase DHHC4, putative	PbANKA_14_v3:836,158..839,751(+)
PBANKA_1419900	PDEgamma	-0.248047	phosphodiesterase gamma, putative	PbANKA_14_v3:792,314..795,823(+)
PBANKA_1419800	null	-0.248047	3',5'-cyclic nucleotide phosphodiesterase, putative	PbANKA_14_v3:784,464..789,373(-)
PBANKA_1417700	null	-0.248047	conserved Plasmodium protein, unknown function	PbANKA_14_v3:702,630..704,840(-)
PBANKA_1416400	null	-0.248047	conserved Plasmodium protein, unknown function	PbANKA_14_v3:655,316..658,051(-)
PBANKA_1414100	PIS	-0.248047	CDP-diacylglycerol--inositol 3-phosphatidyltransferase, putative	PbANKA_14_v3:574,767..576,682(-)
PBANKA_1412400	null	-0.248047	conserved Plasmodium protein, unknown function	PbANKA_14_v3:525,219..528,818(+)
PBANKA_1410600	null	-0.248047	GYF domain-containing protein, putative	PbANKA_14_v3:447,175..450,431(-)
PBANKA_1409300	null	-0.248047	conserved Plasmodium protein, unknown function	PbANKA_14_v3:408,442..412,042(-)
PBANKA_1408800	null	-0.248047	zinc finger protein, putative	PbANKA_14_v3:392,908..393,648(-)
PBANKA_1408600	null	-0.248047	conserved Plasmodium protein, unknown function	PbANKA_14_v3:388,083..390,947(+)
PBANKA_1408200	VPS18	-0.248047	vacuolar protein sorting-associated protein 18, putative	PbANKA_14_v3:378,051..382,466(+)
PBANKA_1406400	null	-0.248047	tripartite motif protein, putative	PbANKA_14_v3:297,270..299,771(-)
PBANKA_1405600	UTP6	-0.248047	U3 small nucleolar RNA-associated protein 6, putative	PbANKA_14_v3:274,987..277,620(+)
PBANKA_1404500	null	-0.248047	conserved Plasmodium protein, unknown function	PbANKA_14_v3:240,025..243,741(+)
PBANKA_1403500	null	-0.248047	conserved Plasmodium protein, unknown function	PbANKA_14_v3:204,560..208,393(+)
PBANKA_1402600	null	-0.248047	DNA ligase I, putative	PbANKA_14_v3:172,551..175,377(-)
PBANKA_1401400	null	-0.248047	conserved Plasmodium protein, unknown function	PbANKA_14_v3:112,140..114,524(+)
PBANKA_1362100	TKL3	-0.248047	tyrosine kinase-like protein, putative	PbANKA_13_v3:2,370,611..2,374,837(+)
PBANKA_1360900	null	-0.248047	GTPase, putative	PbANKA_13_v3:2,321,419..2,323,192(+)
PBANKA_1360600	LRR4.1	-0.248047	leucine-rich repeat protein	PbANKA_13_v3:2,307,472..2,309,219(+)
PBANKA_1360500	ECT	-0.248047	ethanolamine-phosphate cytidylyltransferase	PbANKA_13_v3:2,304,732..2,306,795(+)
PBANKA_1358500	null	-0.248047	inner membrane complex protein, putative	PbANKA_13_v3:2,229,752..2,231,151(+)
PBANKA_1358200	null	-0.248047	conserved Plasmodium protein, unknown function	PbANKA_13_v3:2,218,021..2,218,749(-)
PBANKA_1357300	null	-0.248047	zinc finger protein, putative	PbANKA_13_v3:2,185,287..2,188,451(-)
PBANKA_1333900	null	-0.248047	conserved Plasmodium protein, unknown function	PbANKA_13_v3:1,361,327..1,363,060(+)
PBANKA_1331000	null	-0.248047	conserved Plasmodium protein, unknown function	PbANKA_13_v3:1,249,336..1,249,880(+)
PBANKA_1330900	null	-0.248047	conserved Plasmodium protein, unknown function	PbANKA_13_v3:1,245,223..1,247,754(-)
PBANKA_1330500	WDR79	-0.248047	WD repeat-containing protein 79, putative	PbANKA_13_v3:1,237,112..1,238,737(+)
PBANKA_1328900	null	-0.248047	potassium channel, putative	PbANKA_13_v3:1,151,111..1,155,517(+)
PBANKA_1322200	SAS4	-0.248047	spindle assembly abnormal protein 4, putative	PbANKA_13_v3:914,177..918,516(+)
PBANKA_1321200	VPS4	-0.248047	vacuolar protein sorting-associated protein 4, putative	PbANKA_13_v3:876,534..877,826(-)
PBANKA_1319800	SHMT	-0.248047	serine hydroxymethyltransferase, putative	PbANKA_13_v3:819,772..821,226(-)
PBANKA_1316800	null	-0.248047	dynactin subunit 4, putative	PbANKA_13_v3:704,902..706,983(-)
PBANKA_1316400	null	-0.248047	U1 snRNA associated protein, putative	PbANKA_13_v3:696,087..698,081(+)
PBANKA_1315600	TSR1	-0.248047	ribosome biogenesis protein TSR1, putative	PbANKA_13_v3:658,695..661,652(-)
PBANKA_1315500	null	-0.248047	sortilin, putative	PbANKA_13_v3:654,412..657,497(+)
PBANKA_1313800	SRP54	-0.248047	signal recognition particle subunit SRP54, putative	PbANKA_13_v3:589,158..590,660(-)
PBANKA_1311200	null	-0.248047	conserved Plasmodium protein, unknown function	PbANKA_13_v3:499,493..500,869(-)
PBANKA_1310200	null	-0.248047	conserved Plasmodium protein, unknown function	PbANKA_13_v3:472,598..480,745(+)
PBANKA_1310000	null	-0.248047	conserved Plasmodium protein, unknown function	PbANKA_13_v3:464,961..468,560(+)
PBANKA_1303900	null	-0.248047	conserved Plasmodium protein, unknown function	PbANKA_13_v3:213,529..220,107(-)
PBANKA_1302400	CPSF3	-0.248047	cleavage and polyadenylation specificity factor subunit 3, putative	PbANKA_13_v3:149,897..152,710(-)
PBANKA_1302000	null	-0.248047	conserved Plasmodium protein, unknown function	PbANKA_13_v3:119,343..132,712(+)
PBANKA_1301600	null	-0.248047	conserved Plasmodium protein, unknown function	PbANKA_13_v3:97,611..99,480(-)
PBANKA_1301000	null	-0.248047	conserved protein, unknown function	PbANKA_13_v3:78,099..80,915(-)
PBANKA_1300600	null	-0.248047	bromodomain protein, putative	PbANKA_13_v3:49,632..51,536(+)
PBANKA_1234100	COX10	-0.248047	protoheme IX farnesyltransferase, putative	PbANKA_12_v3:1,306,706..1,308,367(+)
PBANKA_1233100	null	-0.248047	proteasome subunit beta type-1, putative	PbANKA_12_v3:1,273,963..1,275,168(-)
PBANKA_1232900	null	-0.248047	RAP protein, putative	PbANKA_12_v3:1,268,101..1,271,674(+)
PBANKA_1232700	null	-0.248047	zinc finger protein, putative	PbANKA_12_v3:1,262,707..1,264,496(-)
PBANKA_1229600	null	-0.248047	conserved Plasmodium protein, unknown function	PbANKA_12_v3:1,147,055..1,150,860(+)
PBANKA_1228700	NOL10	-0.248047	nucleolar protein 10, putative	PbANKA_12_v3:1,118,316..1,120,019(+)
PBANKA_1228600	null	-0.248047	conserved Plasmodium protein, unknown function	PbANKA_12_v3:1,116,775..1,117,149(+)
PBANKA_1225900	null	-0.248047	conserved Plasmodium protein, unknown function	PbANKA_12_v3:978,311..984,484(+)
PBANKA_1225100	null	-0.248047	conserved Plasmodium protein, unknown function	PbANKA_12_v3:951,167..954,319(+)
PBANKA_1225000	null	-0.248047	serine/threonine protein kinase, FIKK family	PbANKA_12_v3:945,006..948,703(+)
PBANKA_1224700	null	-0.248047	AAA family ATPase, putative	PbANKA_12_v3:934,268..937,727(+)
PBANKA_1224400	null	-0.248047	ferlin, putative	PbANKA_12_v3:921,965..927,136(+)
PBANKA_1224200	null	-0.248047	DnaJ protein, putative	PbANKA_12_v3:916,254..918,704(+)
PBANKA_1223700	null	-0.248047	conserved Plasmodium protein, unknown function	PbANKA_12_v3:894,675..895,781(+)
PBANKA_1223000	null	-0.248047	conserved Plasmodium protein, unknown function	PbANKA_12_v3:872,555..876,207(+)
PBANKA_1221600	null	-0.248047	cell division cycle ATPase, putative	PbANKA_12_v3:827,462..830,830(-)
PBANKA_1221100	null	-0.248047	conserved Plasmodium protein, unknown function	PbANKA_12_v3:816,829..818,089(-)
PBANKA_1220000	null	-0.248047	conserved Plasmodium protein, unknown function	PbANKA_12_v3:770,137..770,714(+)
PBANKA_1218800	ABCI3	-0.248047	ABC transporter I family member 1, putative	PbANKA_12_v3:719,427..728,028(-)
PBANKA_1218400	SEC22	-0.248047	protein transport protein SEC22, putative	PbANKA_12_v3:708,580..710,069(-)
PBANKA_1217800	SPC2	-0.248047	signal peptidase complex subunit SPC2, putative	PbANKA_12_v3:682,463..684,041(-)
PBANKA_1216800	null	-0.248047	conserved Plasmodium protein, unknown function	PbANKA_12_v3:640,837..646,708(+)
PBANKA_1216300	null	-0.248047	conserved Plasmodium protein, unknown function	PbANKA_12_v3:613,553..617,878(+)
PBANKA_1216200	DGAT	-0.248047	diacylglycerol O-acyltransferase, putative	PbANKA_12_v3:610,548..612,230(+)
PBANKA_1215800	null	-0.248047	conserved Plasmodium protein, unknown function	PbANKA_12_v3:591,005..598,509(+)
PBANKA_1215700	null	-0.248047	conserved Plasmodium protein, unknown function	PbANKA_12_v3:588,512..589,588(-)
PBANKA_1215400	null	-0.248047	conserved Plasmodium protein, unknown function	PbANKA_12_v3:578,403..582,938(-)
PBANKA_1214600	null	-0.248047	Rab3 GTPase-activating protein non-catalytic subunit, putative	PbANKA_12_v3:552,206..553,996(+)
PBANKA_1213900	null	-0.248047	conserved Plasmodium protein, unknown function	PbANKA_12_v3:532,073..533,674(-)
PBANKA_1212600	HAP2	-0.248047	male gamete fusion factor HAP2	PbANKA_12_v3:474,993..477,688(+)
PBANKA_1212400	FS	-0.248047	GDP-L-fucose synthase, putative	PbANKA_12_v3:467,020..468,857(-)
PBANKA_1212200	null	-0.248047	conserved Plasmodium protein, unknown function	PbANKA_12_v3:459,632..461,536(+)
PBANKA_1211800	null	-0.248047	conserved Plasmodium protein, unknown function	PbANKA_12_v3:436,893..440,504(-)
PBANKA_1210900	null	-0.248047	phosphoglucomutase, putative	PbANKA_12_v3:401,727..403,508(-)
PBANKA_1209500	null	-0.248047	conserved Plasmodium protein, unknown function	PbANKA_12_v3:360,871..363,340(-)
PBANKA_1206200	HDA2	-0.248047	histone deacetylase 2, putative	PbANKA_12_v3:245,379..251,363(+)
PBANKA_1204900	null	-0.248047	conserved Plasmodium protein, unknown function	PbANKA_12_v3:203,290..204,337(+)
PBANKA_1203400	UTP25	-0.248047	U3 small nucleolar RNA-associated protein 25, putative	PbANKA_12_v3:160,826..163,783(+)
PBANKA_1202900	null	-0.248047	conserved Plasmodium protein, unknown function	PbANKA_12_v3:148,757..152,561(+)
PBANKA_1138700	null	-0.248047	conserved Plasmodium protein, unknown function	PbANKA_11_v3:1,463,862..1,468,115(+)
PBANKA_1137400	null	-0.248047	conserved Plasmodium protein, unknown function	PbANKA_11_v3:1,417,838..1,419,619(+)
PBANKA_1137100	PRMT5	-0.248047	protein arginine N-methyltransferase 5, putative	PbANKA_11_v3:1,400,640..1,402,841(-)
PBANKA_1135500	HMGB4	-0.248047	high mobility group protein B4, putative	PbANKA_11_v3:1,333,297..1,335,589(-)
PBANKA_1135400	null	-0.248047	riboflavin kinase / FAD synthase family protein, putative	PbANKA_11_v3:1,330,430..1,332,550(-)
PBANKA_1134900	null	-0.248047	zinc finger protein, putative	PbANKA_11_v3:1,306,967..1,309,579(+)
PBANKA_1133200	CRK2	-0.248047	cdc2-related kinase 2	PbANKA_11_v3:1,251,337..1,252,887(-)
PBANKA_1131500	null	-0.248047	conserved Plasmodium protein, unknown function	PbANKA_11_v3:1,179,855..1,181,534(+)
PBANKA_1126500	ACS	-0.248047	acetyl-CoA synthetase, putative	PbANKA_11_v3:971,722..974,574(-)
PBANKA_1125200	null	-0.248047	Sec14 protein, putative	PbANKA_11_v3:928,879..931,407(+)
PBANKA_1123700	null	-0.248047	conserved Plasmodium protein, unknown function	PbANKA_11_v3:880,627..882,494(-)
PBANKA_1122700	TKL4	-0.248047	tyrosine kinase-like protein, putative	PbANKA_11_v3:840,258..846,242(-)
PBANKA_1121900	CS	-0.248047	chorismate synthase, putative	PbANKA_11_v3:815,464..816,984(-)
PBANKA_1120100	null	-0.248047	conserved Plasmodium protein, unknown function	PbANKA_11_v3:748,396..752,274(-)
PBANKA_1118100	GPI1	-0.248047	phosphatidylinositol N-acetylglucosaminyltransferase subunit GPI1, putative	PbANKA_11_v3:674,236..677,358(+)
PBANKA_1117300	null	-0.248047	conserved Plasmodium protein, unknown function	PbANKA_11_v3:654,318..656,363(+)
PBANKA_1115700	NDC80	-0.248047	kinetochore protein NDC80, putative	PbANKA_11_v3:599,215..601,771(+)
PBANKA_1115000	null	-0.248047	conserved Plasmodium protein, unknown function	PbANKA_11_v3:574,057..576,710(+)
PBANKA_1114900	PI3K	-0.248047	phosphatidylinositol 3-kinase, putative	PbANKA_11_v3:566,520..571,853(+)
PBANKA_1114000	null	-0.248047	aspartate--tRNA ligase, putative	PbANKA_11_v3:538,800..542,084(+)
PBANKA_1110600	null	-0.248047	conserved Plasmodium protein, unknown function	PbANKA_11_v3:417,256..417,802(+)
PBANKA_1109800	CYP87	-0.248047	peptidyl-prolyl cis-trans isomerase, putative	PbANKA_11_v3:390,663..392,870(+)
PBANKA_1109600	null	-0.248047	conserved Plasmodium protein, unknown function	PbANKA_11_v3:375,478..378,530(+)
PBANKA_1109100	null	-0.248047	ERCC4 domain-containing protein, putative	PbANKA_11_v3:359,979..360,992(+)
PBANKA_1107300	NPL4	-0.248047	nuclear protein localization protein 4, putative	PbANKA_11_v3:283,766..285,316(-)
PBANKA_1106900	null	-0.248047	conserved Plasmodium protein, unknown function	PbANKA_11_v3:270,743..273,253(-)
PBANKA_1106500	ROM4	-0.248047	rhomboid protease ROM4	PbANKA_11_v3:259,183..261,009(-)
PBANKA_1106100	null	-0.248047	conserved Plasmodium protein, unknown function	PbANKA_11_v3:240,176..249,404(+)
PBANKA_1105700	null	-0.248047	60S ribosomal subunit protein L24, putative	PbANKA_11_v3:232,615..233,504(-)
PBANKA_1105600	null	-0.248047	conserved Plasmodium protein, unknown function	PbANKA_11_v3:231,298..232,271(+)
PBANKA_1105500	null	-0.248047	conserved Plasmodium protein, unknown function	PbANKA_11_v3:229,681..230,809(-)
PBANKA_1105000	null	-0.248047	conserved Plasmodium protein, unknown function	PbANKA_11_v3:213,185..215,296(-)
PBANKA_1104600	null	-0.248047	conserved Plasmodium protein, unknown function	PbANKA_11_v3:190,924..197,924(-)
PBANKA_1104400	null	-0.248047	conserved Plasmodium protein, unknown function	PbANKA_11_v3:174,363..187,793(-)
PBANKA_1103300	MyoB	-0.248047	myosin B	PbANKA_11_v3:142,035..145,382(-)
PBANKA_1102900	null	-0.248047	conserved Plasmodium protein, unknown function	PbANKA_11_v3:127,793..130,402(+)
PBANKA_1101800	VPS11	-0.248047	vacuolar protein sorting-associated protein 11, putative	PbANKA_11_v3:99,360..103,123(+)
PBANKA_1101700	null	-0.248047	conserved protein, unknown function	PbANKA_11_v3:97,204..98,567(-)
PBANKA_1038400	Sel1	-0.248047	selenoprotein, putative	PbANKA_10_v3:1,540,398..1,541,067(-)
PBANKA_1037200	null	-0.248047	conserved Plasmodium protein, unknown function	PbANKA_10_v3:1,504,649..1,507,475(-)
PBANKA_1037100	null	-0.248047	GTPase-activating protein, putative	PbANKA_10_v3:1,500,346..1,503,919(+)
PBANKA_1036800	MutS	-0.248047	DNA mismatch repair protein, putative	PbANKA_10_v3:1,490,863..1,495,561(+)
PBANKA_1036700	CBWD1	-0.248047	COBW domain-containing protein 1, putative	PbANKA_10_v3:1,488,232..1,489,968(-)
PBANKA_1036500	null	-0.248047	RING zinc finger protein, putative	PbANKA_10_v3:1,482,658..1,484,313(+)
PBANKA_1036400	BOP1	-0.248047	ribosome biogenesis protein BOP1, putative	PbANKA_10_v3:1,477,776..1,481,049(+)
PBANKA_1014200	null	-0.248047	conserved Plasmodium protein, unknown function	PbANKA_10_v3:628,547..629,767(-)
PBANKA_1012300	null	-0.248047	conserved Plasmodium protein, unknown function	PbANKA_10_v3:565,360..568,737(+)
PBANKA_1011800	null	-0.248047	HID1 domain-containing protein, putative	PbANKA_10_v3:552,073..555,476(-)
PBANKA_1011200	null	-0.248047	conserved Plasmodium protein, unknown function	PbANKA_10_v3:513,048..518,598(+)
PBANKA_1011100	null	-0.248047	conserved Plasmodium protein, unknown function	PbANKA_10_v3:504,802..511,677(+)
PBANKA_1010400	null	-0.248047	conserved Plasmodium protein, unknown function	PbANKA_10_v3:484,969..486,163(+)
PBANKA_1009900	null	-0.248047	conserved Plasmodium protein, unknown function	PbANKA_10_v3:451,620..453,042(-)
PBANKA_1009100	null	-0.248047	ataxin-2 like protein, putative	PbANKA_10_v3:416,230..420,019(+)
PBANKA_1008700	null	-0.248047	conserved Plasmodium protein, unknown function	PbANKA_10_v3:399,521..404,761(-)
PBANKA_1007100	null	-0.248047	conserved Plasmodium protein, unknown function	PbANKA_10_v3:341,800..343,178(-)
PBANKA_1006900	null	-0.248047	conserved Plasmodium protein, unknown function	PbANKA_10_v3:334,726..337,800(-)
PBANKA_1006600	null	-0.248047	conserved Plasmodium protein, unknown function	PbANKA_10_v3:322,717..329,223(-)
PBANKA_1005900	ZRANB2	-0.248047	zinc finger Ran-binding domain-containing protein 2, putative	PbANKA_10_v3:298,142..299,803(-)
PBANKA_1005500	null	-0.248047	AAA family ATPase, putative	PbANKA_10_v3:285,740..287,614(-)
PBANKA_1004800	PTH2	-0.248047	peptidyl-tRNA hydrolase 2, putative	PbANKA_10_v3:259,035..260,126(-)
PBANKA_1003700	null	-0.248047	conserved Plasmodium protein, unknown function	PbANKA_10_v3:223,874..225,427(+)
PBANKA_1003500	null	-0.248047	conserved Plasmodium protein, unknown function	PbANKA_10_v3:218,044..218,358(+)
PBANKA_1002800	SEC24B	-0.248047	protein transport protein Sec24B, putative	PbANKA_10_v3:171,451..176,105(-)
PBANKA_1002400	DPAP3	-0.248047	dipeptidyl aminopeptidase 3, putative	PbANKA_10_v3:158,869..161,537(-)
PBANKA_1002200	P36p	-0.248047	6-cysteine protein	PbANKA_10_v3:140,415..141,833(-)
PBANKA_1001600	SET8	-0.248047	SET domain protein, putative	PbANKA_10_v3:113,306..116,886(+)
PBANKA_1000800	null	-0.248047	conserved Plasmodium protein, unknown function	PbANKA_10_v3:71,642..72,712(+)
PBANKA_0920100	null	-0.248047	prefoldin subunit 5, putative	PbANKA_09_v3:743,825..744,906(+)
PBANKA_0918900	null	-0.248047	conserved Plasmodium protein, unknown function	PbANKA_09_v3:703,423..708,786(+)
PBANKA_0918600	null	-0.248047	phosphatidylinositol-4-phosphate 5-kinase, putative	PbANKA_09_v3:692,141..695,191(-)
PBANKA_0917700	null	-0.248047	methyltransferase, putative	PbANKA_09_v3:664,052..666,922(-)
PBANKA_0917500	SMC1	-0.248047	structural maintenance of chromosomes protein 1, putative	PbANKA_09_v3:659,130..663,992(+)
PBANKA_0917300	null	-0.248047	conserved Plasmodium protein, unknown function	PbANKA_09_v3:650,848..654,593(-)
PBANKA_0916400	null	-0.248047	ubiquitin-like protein, putative	PbANKA_09_v3:618,560..620,887(-)
PBANKA_0915200	null	-0.248047	conserved Plasmodium protein, unknown function	PbANKA_09_v3:580,909..584,874(+)
PBANKA_0914500	null	-0.248047	conserved Plasmodium protein, unknown function	PbANKA_09_v3:556,382..560,480(-)
PBANKA_0914400	UIS24	-0.248047	heat shock protein 70, putative	PbANKA_09_v3:551,624..553,615(-)
PBANKA_0913500	null	-0.248047	PQ-loop repeat-containing protein	PbANKA_09_v3:512,055..513,684(-)
PBANKA_0913400	PPM8	-0.248047	protein phosphatase PPM8	PbANKA_09_v3:509,205..510,938(+)
PBANKA_0913200	null	-0.248047	conserved Plasmodium membrane protein, unknown function	PbANKA_09_v3:502,649..503,896(+)
PBANKA_0912700	null	-0.248047	3-oxo-5-alpha-steroid 4-dehydrogenase, putative	PbANKA_09_v3:486,809..489,203(+)
PBANKA_0912300	TSN	-0.248047	tudor staphylococcal nuclease, putative	PbANKA_09_v3:462,202..465,492(-)
PBANKA_0912200	SRP72	-0.248047	signal recognition particle subunit SRP72, putative	PbANKA_09_v3:459,193..461,592(+)
PBANKA_0912100	CK1	-0.248047	casein kinase 1, putative	PbANKA_09_v3:454,542..456,457(+)
PBANKA_0911800	null	-0.248047	DnaJ protein, putative	PbANKA_09_v3:440,702..442,426(+)
PBANKA_0910000	null	-0.248047	conserved Plasmodium protein, unknown function	PbANKA_09_v3:367,202..372,838(+)
PBANKA_0909900	null	-0.248047	WD repeat-containing protein, putative	PbANKA_09_v3:360,201..365,980(+)
PBANKA_0909800	null	-0.248047	RNA-binding protein, putative	PbANKA_09_v3:350,819..355,261(-)
PBANKA_0909700	null	-0.248047	conserved Plasmodium protein, unknown function	PbANKA_09_v3:348,927..350,211(+)
PBANKA_0906900	null	-0.248047	conserved Plasmodium protein, unknown function	PbANKA_09_v3:228,144..235,154(+)
PBANKA_0906500	null	-0.248047	60S ribosomal protein L28, putative	PbANKA_09_v3:212,735..213,540(+)
PBANKA_0904900	null	-0.248047	mitochondrial large subunit ribosomal protein, putative	PbANKA_09_v3:170,089..170,718(+)
PBANKA_0904300	TIC20	-0.248047	apicoplast import protein Tic20, putative	PbANKA_09_v3:155,684..156,981(+)
PBANKA_0903700	CRIPT	-0.248047	cysteine-rich PDZ-binding protein, putative	PbANKA_09_v3:133,999..134,667(+)
PBANKA_0903600	DYN1	-0.248047	dynamin-like protein, putative	PbANKA_09_v3:130,352..133,246(+)
PBANKA_0903400	null	-0.248047	conserved protein, unknown function	PbANKA_09_v3:122,618..125,030(+)
PBANKA_0903200	null	-0.248047	conserved Plasmodium protein, unknown function	PbANKA_09_v3:116,679..119,492(+)
PBANKA_0903000	RSA4	-0.248047	ribosome assembly protein 4, putative	PbANKA_09_v3:110,721..112,709(+)
PBANKA_0902700	null	-0.248047	conserved Plasmodium protein, unknown function	PbANKA_09_v3:104,402..105,467(+)
PBANKA_0902500	ORP1	-0.248047	oocyst rupture protein 1	PbANKA_09_v3:96,381..99,624(-)
PBANKA_0901700	null	-0.248047	conserved Plasmodium protein, unknown function	PbANKA_09_v3:46,982..47,462(+)
PBANKA_0836300	CLAG9	-0.248047	cytoadherence linked asexual protein 9	PbANKA_08_v3:1,329,727..1,334,628(-)
PBANKA_0836200	null	-0.248047	conserved Plasmodium protein, unknown function	PbANKA_08_v3:1,326,359..1,328,673(+)
PBANKA_0834700	null	-0.248047	conserved Plasmodium protein, unknown function	PbANKA_08_v3:1,293,194..1,294,331(-)
PBANKA_0834300	null	-0.248047	gamma-tubulin complex component, putative	PbANKA_08_v3:1,281,358..1,285,086(-)
PBANKA_0833600	CSE1	-0.248047	importin alpha re-exporter, putative	PbANKA_08_v3:1,260,568..1,264,813(-)
PBANKA_0833300	DHHC6	-0.248047	palmitoyltransferase DHHC6, putative	PbANKA_08_v3:1,252,400..1,254,842(-)
PBANKA_0832100	null	-0.248047	conserved Plasmodium protein, unknown function	PbANKA_08_v3:1,221,774..1,223,417(+)
PBANKA_0831100	null	-0.248047	zinc finger protein, putative	PbANKA_08_v3:1,177,101..1,180,163(+)
PBANKA_0830800	null	-0.248047	conserved Plasmodium protein, unknown function	PbANKA_08_v3:1,161,078..1,164,311(-)
PBANKA_0830200	RhopH2	-0.248047	high molecular weight rhoptry protein 2	PbANKA_08_v3:1,145,085..1,149,997(+)
PBANKA_0829600	null	-0.248047	serine/threonine protein kinase, putative	PbANKA_08_v3:1,129,630..1,131,432(+)
PBANKA_0828300	null	-0.248047	dynein light chain, putative	PbANKA_08_v3:1,098,327..1,099,601(-)
PBANKA_0826600	null	-0.248047	conserved Plasmodium protein, unknown function	PbANKA_08_v3:1,019,789..1,023,898(+)
PBANKA_0825900	null	-0.248047	conserved Plasmodium protein, unknown function	PbANKA_08_v3:1,001,149..1,002,207(-)
PBANKA_0825500	null	-0.248047	conserved Plasmodium protein, unknown function	PbANKA_08_v3:988,583..993,904(+)
PBANKA_0823100	SAMS	-0.248047	S-adenosylmethionine synthetase, putative	PbANKA_08_v3:902,860..904,068(+)
PBANKA_0819800	gammaGCS	-0.248047	gamma-glutamylcysteine synthetase	PbANKA_08_v3:790,387..793,290(+)
PBANKA_0819500	RECQ1	-0.248047	ATP-dependent DNA helicase Q1, putative	PbANKA_08_v3:779,878..781,779(+)
PBANKA_0819200	null	-0.248047	50S ribosomal protein L3, apicoplast, putative	PbANKA_08_v3:764,695..766,396(-)
PBANKA_0817700	HoMu	-0.248047	RNA-binding protein musashi, putative	PbANKA_08_v3:716,082..717,116(-)
PBANKA_0816400	PFK9	-0.248047	ATP-dependent 6-phosphofructokinase, putative	PbANKA_08_v3:674,000..677,899(-)
PBANKA_0814400	null	-0.248047	conserved Plasmodium protein, unknown function	PbANKA_08_v3:614,728..615,443(-)
PBANKA_0813100	null	-0.248047	conserved Plasmodium protein, unknown function	PbANKA_08_v3:578,723..583,315(-)
PBANKA_0812500	null	-0.248047	conserved Plasmodium protein, unknown function	PbANKA_08_v3:560,890..564,653(-)
PBANKA_0810600	null	-0.248047	exoribonuclease, putative	PbANKA_08_v3:476,825..480,706(+)
PBANKA_0809900	null	-0.248047	tRNA pseudouridine synthase, putative	PbANKA_08_v3:457,283..459,252(-)
PBANKA_0808100	B9	-0.248047	6-cysteine protein	PbANKA_08_v3:400,635..403,292(-)
PBANKA_0808000	CRK4	-0.248047	cdc2-related protein kinase 4, putative	PbANKA_08_v3:395,154..399,182(+)
PBANKA_0807900	null	-0.248047	conserved Plasmodium protein, unknown function	PbANKA_08_v3:382,735..391,257(+)
PBANKA_0807700	EG5	-0.248047	kinesin-5, putative	PbANKA_08_v3:371,508..375,913(+)
PBANKA_0807000	RPB1	-0.248047	DNA-directed RNA polymerase II subunit RPB1, putative	PbANKA_08_v3:339,820..346,752(-)
PBANKA_0806900	null	-0.248047	conserved Plasmodium protein, unknown function	PbANKA_08_v3:335,891..338,901(+)
PBANKA_0804900	null	-0.248047	E3 ubiquitin-protein ligase, putative	PbANKA_08_v3:255,566..258,346(+)
PBANKA_0802700	null	-0.248047	mRNA cap guanine-N7 methyltransferase, putative	PbANKA_08_v3:155,526..158,779(-)
PBANKA_0802400	PPAT	-0.248047	phosphopantetheine adenylyltransferase, putative	PbANKA_08_v3:144,192..148,010(+)
PBANKA_0802200	null	-0.248047	serine/threonine protein kinase, putative	PbANKA_08_v3:124,284..128,156(-)
PBANKA_0801700	null	-0.248047	conserved Plasmodium protein, unknown function	PbANKA_08_v3:85,222..94,251(-)
PBANKA_0801300	null	-0.248047	conserved Plasmodium protein, unknown function	PbANKA_08_v3:63,273..65,206(+)
PBANKA_0800400	null	-0.248047	conserved Plasmodium protein, unknown function	PbANKA_08_v3:26,272..26,626(-)
PBANKA_0721500	null	-0.248047	conserved Plasmodium protein, unknown function	PbANKA_07_v3:778,662..785,540(+)
PBANKA_0720000	null	-0.248047	conserved Plasmodium protein, unknown function	PbANKA_07_v3:721,799..723,982(+)
PBANKA_0719900	CRK1	-0.248047	cdc2-related protein kinase 1	PbANKA_07_v3:718,379..720,115(-)
PBANKA_0719600	null	-0.248047	memo-like protein	PbANKA_07_v3:708,710..710,870(-)
PBANKA_0715300	null	-0.248047	conserved Plasmodium protein, unknown function	PbANKA_07_v3:569,908..571,855(-)
PBANKA_0714000	DMC1	-0.248047	meiotic recombination protein DMC1	PbANKA_07_v3:533,360..534,985(+)
PBANKA_0713500	null	-0.248047	conserved Plasmodium protein, unknown function	PbANKA_07_v3:515,945..521,595(+)
PBANKA_0711800	null	-0.248047	conserved Plasmodium protein, unknown function	PbANKA_07_v3:449,926..453,935(+)
PBANKA_0711300	null	-0.248047	conserved protein, unknown function	PbANKA_07_v3:433,886..436,596(-)
PBANKA_0710800	SRCAP	-0.248047	Snf2-related CBP activator, putative	PbANKA_07_v3:412,980..419,138(+)
PBANKA_0708200	null	-0.248047	conserved Plasmodium protein, unknown function	PbANKA_07_v3:336,745..339,093(-)
PBANKA_0707300	GCN5	-0.248047	histone acetyltransferase GCN5, putative	PbANKA_07_v3:301,494..305,672(-)
PBANKA_0705600	null	-0.248047	conserved Plasmodium protein, unknown function	PbANKA_07_v3:247,831..252,616(-)
PBANKA_0705500	null	-0.248047	ankyrin-repeat protein, putative	PbANKA_07_v3:245,849..247,090(-)
PBANKA_0703000	null	-0.248047	magnesium transporter, putative	PbANKA_07_v3:155,046..156,781(+)
PBANKA_0702900	null	-0.248047	SET domain protein, putative	PbANKA_07_v3:146,338..152,472(-)
PBANKA_0702600	null	-0.248047	conserved Plasmodium protein, unknown function	PbANKA_07_v3:137,124..139,976(+)
PBANKA_0702300	OXA1	-0.248047	mitochondrial inner membrane protein OXA1, putative	PbANKA_07_v3:128,222..129,493(+)
PBANKA_0702100	FT1	-0.248047	folate transporter 1, putative	PbANKA_07_v3:122,665..124,484(+)
PBANKA_0701700	null	-0.248047	conserved Plasmodium protein, unknown function	PbANKA_07_v3:103,758..108,783(-)
PBANKA_0620800	null	-0.248047	conserved Plasmodium protein, unknown function	PbANKA_06_v3:830,151..831,830(+)
PBANKA_0619800	null	-0.248047	zinc finger protein, putative	PbANKA_06_v3:806,402..809,539(-)
PBANKA_0617300	null	-0.248047	conserved Plasmodium protein, unknown function	PbANKA_06_v3:730,373..731,851(-)
PBANKA_0616200	null	-0.248047	conserved Plasmodium protein, unknown function	PbANKA_06_v3:698,518..702,877(+)
PBANKA_0615000	null	-0.248047	transcription initiation factor IIE subunit alpha, putative	PbANKA_06_v3:626,039..627,763(+)
PBANKA_0613000	null	-0.248047	conserved Plasmodium protein, unknown function	PbANKA_06_v3:551,872..555,582(-)
PBANKA_0611800	null	-0.248047	N-acetyltransferase, putative	PbANKA_06_v3:514,961..517,207(-)
PBANKA_0610300	null	-0.248047	polyubiquitin, putative	PbANKA_06_v3:468,199..469,324(+)
PBANKA_0610200	MCM5	-0.248047	DNA replication licensing factor MCM5, putative	PbANKA_06_v3:463,815..466,958(+)
PBANKA_0609700	null	-0.248047	conserved Plasmodium protein, unknown function	PbANKA_06_v3:437,113..441,468(-)
PBANKA_0609600	null	-0.248047	heat shock protein 20, putative	PbANKA_06_v3:435,884..436,585(+)
PBANKA_0609300	PIGM	-0.248047	GPI mannosyltransferase 1, putative	PbANKA_06_v3:425,980..428,567(+)
PBANKA_0608900	null	-0.248047	general transcription factor 3C polypeptide 5, putative	PbANKA_06_v3:411,061..413,661(-)
PBANKA_0607300	null	-0.248047	zinc finger protein, putative	PbANKA_06_v3:354,402..357,056(-)
PBANKA_0605200	RPC2	-0.248047	DNA-directed RNA polymerase III subunit RPC2, putative	PbANKA_06_v3:262,915..267,180(-)
PBANKA_0604700	SHLP2	-0.248047	shewanella-like protein phosphatase 2, putative	PbANKA_06_v3:242,888..243,796(-)
PBANKA_0604200	null	-0.248047	zinc finger protein, putative	PbANKA_06_v3:218,592..222,220(+)
PBANKA_0603800	SEPSECS	-0.248047	O-phosphoseryl-tRNA(Sec) selenium transferase, putative	PbANKA_06_v3:201,367..203,559(-)
PBANKA_0602800	UBC	-0.248047	ubiquitin-conjugating enzyme E2, putative	PbANKA_06_v3:176,921..178,217(+)
PBANKA_0601500	TGS1	-0.248047	trimethylguanosine synthase, putative	PbANKA_06_v3:133,832..136,687(-)
PBANKA_0507000	GcpE	-0.248047	4-hydroxy-3-methylbut-2-en-1-yl diphosphate synthase, putative	PbANKA_05_v3:295,389..297,848(+)
PBANKA_0506400	null	-0.248047	conserved Plasmodium membrane protein, unknown function	PbANKA_05_v3:268,668..270,956(-)
PBANKA_0506200	UIS12	-0.248047	RNA-binding protein, putative	PbANKA_05_v3:262,315..266,384(+)
PBANKA_0505400	null	-0.248047	conserved Plasmodium protein, unknown function	PbANKA_05_v3:210,532..212,292(-)
PBANKA_0503800	null	-0.248047	conserved Plasmodium protein, unknown function	PbANKA_05_v3:156,155..158,755(+)
PBANKA_0503000	null	-0.248047	conserved protein, unknown function	PbANKA_05_v3:113,639..115,218(+)
PBANKA_0502650	null	-0.248047	conserved Plasmodium protein, unknown function	PbANKA_05_v3:99,859..100,797(+)
PBANKA_0417400	null	-0.248047	GTPase-activating protein, putative	PbANKA_04_v3:653,969..655,003(+)
PBANKA_0417000	SPC3	-0.248047	signal peptidase complex subunit 3, putative	PbANKA_04_v3:635,115..635,672(+)
PBANKA_0413500	null	-0.248047	conserved Plasmodium protein, unknown function	PbANKA_04_v3:484,860..488,050(+)
PBANKA_0408900	null	-0.248047	conserved Plasmodium protein, unknown function	PbANKA_04_v3:325,304..327,601(+)
PBANKA_0406800	PRPF19	-0.248047	pre-mRNA-processing factor 19, putative	PbANKA_04_v3:249,319..250,818(+)
PBANKA_0406100	null	-0.248047	conserved Plasmodium protein, unknown function	PbANKA_04_v3:216,808..218,658(+)
PBANKA_0406000	null	-0.248047	conserved Plasmodium protein, unknown function	PbANKA_04_v3:209,544..214,856(-)
PBANKA_0404500	null	-0.248047	conserved Plasmodium protein, unknown function	PbANKA_04_v3:173,316..174,535(-)
PBANKA_0402600	IMC1a	-0.248047	inner membrane complex protein 1a	PbANKA_04_v3:94,549..97,340(-)
PBANKA_0401500	null	-0.248047	exportin-1, putative	PbANKA_04_v3:52,811..56,822(-)
PBANKA_0306000	P230p	-0.248047	6-cysteine protein	PbANKA_03_v3:201,621..208,484(+)
PBANKA_0302100	null	-0.248047	conserved Plasmodium protein, unknown function	PbANKA_03_v3:70,066..72,033(-)
PBANKA_0301800	null	-0.248047	condensin-2 complex subunit H2, putative	PbANKA_03_v3:56,946..59,397(+)
PBANKA_0301600	null	-0.248047	conserved Plasmodium protein, unknown function	PbANKA_03_v3:50,728..53,602(-)
PBANKA_0301000	ROPE	-0.248047	repetitive organellar protein, putative	PbANKA_03_v3:31,915..36,786(-)
PBANKA_0214200	null	-0.248047	tRNA pseudouridine synthase D, putative	PbANKA_02_v3:531,512..533,986(+)
PBANKA_0213500	null	-0.248047	ribosome biogenesis protein BRX1 homolog, putative	PbANKA_02_v3:501,505..502,554(+)
PBANKA_0212000	null	-0.248047	conserved Plasmodium protein, unknown function	PbANKA_02_v3:436,210..441,618(+)
PBANKA_0211200	null	-0.248047	conserved Plasmodium protein, unknown function	PbANKA_02_v3:406,241..408,892(-)
PBANKA_0211100	VPS53	-0.248047	vacuolar protein sorting-associated protein 53, putative	PbANKA_02_v3:402,591..405,410(-)
PBANKA_0210100	null	-0.248047	vacuolar protein sorting-associated protein VTA1, putative	PbANKA_02_v3:357,472..359,210(+)
PBANKA_0209700	null	-0.248047	zinc-carboxypeptidase, putative	PbANKA_02_v3:340,868..345,481(+)
PBANKA_0208500	null	-0.248047	conserved Plasmodium protein, unknown function	PbANKA_02_v3:291,596..295,393(-)
PBANKA_0207500	null	-0.248047	conserved Plasmodium protein, unknown function	PbANKA_02_v3:256,770..259,326(+)
PBANKA_0207400	null	-0.248047	DNA binding protein, putative	PbANKA_02_v3:253,106..254,641(-)
PBANKA_0206500	RAB5c	-0.248047	ras-related protein Rab-5C, putative	PbANKA_02_v3:223,458..225,365(-)
PBANKA_0206200	null	-0.248047	conserved Plasmodium protein, unknown function	PbANKA_02_v3:216,165..217,598(+)
PBANKA_0206100	null	-0.248047	carbon catabolite repressor protein 4, putative	PbANKA_02_v3:213,722..215,716(-)
PBANKA_0203500	null	-0.248047	selenocysteine-specific elongation factor selB homologue, putative	PbANKA_02_v3:131,598..133,697(+)
PBANKA_0202400	null	-0.248047	conserved Plasmodium protein, unknown function	PbANKA_02_v3:95,575..97,197(-)
PBANKA_0202000	null	-0.248047	eukaryotic translation initiation factor 4E, putative	PbANKA_02_v3:87,321..89,778(-)
PBANKA_0112400	NAR1	-0.248047	cytosolic Fe-S cluster assembly factor NAR1, putative	PbANKA_01_v3:486,084..488,519(-)
PBANKA_0111900	null	-0.248047	conserved Plasmodium protein, unknown function	PbANKA_01_v3:457,092..459,260(+)
PBANKA_0111600	ROP14	-0.248047	rhoptry protein ROP14, putative	PbANKA_01_v3:444,999..448,675(-)
PBANKA_0111400	null	-0.248047	conserved Plasmodium protein, unknown function	PbANKA_01_v3:442,214..442,980(+)
PBANKA_0108700	RBM25	-0.248047	RNA-binding protein 25, putative	PbANKA_01_v3:357,597..359,636(-)
PBANKA_0108600	SLU7	-0.248047	pre-mRNA-splicing factor SLU7, putative	PbANKA_01_v3:354,635..356,417(-)
PBANKA_0103200	null	-0.248047	conserved Plasmodium protein, unknown function	PbANKA_01_v3:144,470..145,601(+)
PBANKA_0102500	null	-0.248047	phenylalanine--tRNA ligase, putative	PbANKA_01_v3:112,462..113,895(+)
PBANKA_0101600	JmjC2	-0.248047	JmjC domain-containing protein, putative	PbANKA_01_v3:79,755..81,779(+)
PBANKA_1461400	null	-0.278451	bax inhibitor 1, putative	PbANKA_14_v3:2,321,056..2,321,910(-)
PBANKA_1460300	null	-0.278451	GPI mannosyltransferase 2, putative	PbANKA_14_v3:2,295,427..2,297,233(+)
PBANKA_1458800	null	-0.278451	kinesin, putative	PbANKA_14_v3:2,249,522..2,253,766(-)
PBANKA_1455300	null	-0.278451	tetratricopeptide repeat protein, putative	PbANKA_14_v3:2,146,347..2,147,573(+)
PBANKA_1454800	null	-0.278451	RNA-binding protein, putative	PbANKA_14_v3:2,124,094..2,129,658(-)
PBANKA_1454600	null	-0.278451	conserved Plasmodium protein, unknown function	PbANKA_14_v3:2,112,256..2,119,399(-)
PBANKA_1448200	null	-0.278451	asparagine/aspartate rich protein, putative	PbANKA_14_v3:1,852,489..1,867,096(+)
PBANKA_1448000	null	-0.278451	pentatricopeptide repeat domain-containing protein, putative	PbANKA_14_v3:1,844,078..1,847,686(+)
PBANKA_1443400	null	-0.278451	conserved Plasmodium protein, unknown function	PbANKA_14_v3:1,656,169..1,659,377(+)
PBANKA_1442200	null	-0.278451	conserved Plasmodium protein, unknown function	PbANKA_14_v3:1,598,986..1,615,105(-)
PBANKA_1434800	null	-0.278451	aminophospholipid-transporting P-ATPase, putative	PbANKA_14_v3:1,310,147..1,314,994(-)
PBANKA_1434500	null	-0.278451	conserved Plasmodium protein, unknown function	PbANKA_14_v3:1,286,701..1,288,959(-)
PBANKA_1433700	null	-0.278451	conserved Plasmodium protein, unknown function	PbANKA_14_v3:1,254,662..1,256,388(+)
PBANKA_1433500	null	-0.278451	PPPDE peptidase domain-containing protein, putative	PbANKA_14_v3:1,249,205..1,250,776(+)
PBANKA_1431400	null	-0.278451	conserved Plasmodium protein, unknown function	PbANKA_14_v3:1,188,905..1,192,273(-)
PBANKA_1427800	null	-0.278451	peptidase family C50, putative	PbANKA_14_v3:1,069,052..1,085,620(+)
PBANKA_1426700	PPPK-DHPS	-0.278451	hydroxymethyldihydropterin pyrophosphokinase-dihydropteroate synthase, putative	PbANKA_14_v3:1,030,129..1,032,585(-)
PBANKA_1426500	CUL1	-0.278451	cullin-1, putative	PbANKA_14_v3:1,023,394..1,026,236(-)
PBANKA_1425400	null	-0.278451	conserved protein, unknown function	PbANKA_14_v3:970,482..977,786(-)
PBANKA_1424200	null	-0.278451	conserved Plasmodium protein, unknown function	PbANKA_14_v3:929,496..932,733(+)
PBANKA_1415100	CCT	-0.278451	choline-phosphate cytidylyltransferase	PbANKA_14_v3:606,944..609,891(+)
PBANKA_1407400	DCP2	-0.278451	mRNA-decapping enzyme 2, putative	PbANKA_14_v3:347,290..351,414(-)
PBANKA_1365300	null	-0.278451	P-loop containing nucleoside triphosphate hydrolase, putative	PbANKA_13_v3:2,477,996..2,484,763(+)
PBANKA_1365100	null	-0.278451	conserved Plasmodium protein, unknown function	PbANKA_13_v3:2,466,438..2,470,847(+)
PBANKA_1363800	null	-0.278451	phosphatidylinositol transfer protein, putative	PbANKA_13_v3:2,419,760..2,424,708(+)
PBANKA_1359900	WDR92	-0.278451	WD repeat-containing protein 92, putative	PbANKA_13_v3:2,282,563..2,284,685(-)
PBANKA_1358900	null	-0.278451	dynactin subunit 2, putative	PbANKA_13_v3:2,241,717..2,244,053(-)
PBANKA_1357800	null	-0.278451	conserved Plasmodium protein, unknown function	PbANKA_13_v3:2,205,086..2,209,312(+)
PBANKA_1333600	MPC2	-0.278451	mitochondrial pyruvate carrier protein 2, putative	PbANKA_13_v3:1,351,980..1,352,732(-)
PBANKA_1333300	null	-0.278451	conserved Plasmodium protein, unknown function	PbANKA_13_v3:1,342,680..1,349,371(+)
PBANKA_1332100	null	-0.278451	conserved Plasmodium protein, unknown function	PbANKA_13_v3:1,304,331..1,306,670(-)
PBANKA_1331900	eIF4A	-0.278451	eukaryotic initiation factor 4a, putative	PbANKA_13_v3:1,297,871..1,299,452(+)
PBANKA_1320800	null	-0.278451	conserved Plasmodium protein, unknown function	PbANKA_13_v3:857,880..860,345(+)
PBANKA_1317700	null	-0.278451	RNA-binding protein, putative	PbANKA_13_v3:744,505..745,995(+)
PBANKA_1317200	null	-0.278451	pyridine nucleotide transhydrogenase, putative	PbANKA_13_v3:722,581..726,493(-)
PBANKA_1314100	null	-0.278451	zinc finger protein, putative	PbANKA_13_v3:596,327..601,401(-)
PBANKA_1314000	CPR	-0.278451	NADPH--cytochrome P450 reductase, putative	PbANKA_13_v3:593,243..595,525(+)
PBANKA_1306900	SRPK2	-0.278451	serine/threonine protein kinase, putative	PbANKA_13_v3:341,953..345,930(-)
PBANKA_1306300	null	-0.278451	conserved Plasmodium protein, unknown function	PbANKA_13_v3:301,251..307,250(+)
PBANKA_1304200	SPP	-0.278451	stromal-processing peptidase, putative	PbANKA_13_v3:227,665..235,180(+)
PBANKA_1303100	null	-0.278451	conserved Plasmodium protein, unknown function	PbANKA_13_v3:181,313..185,639(+)
PBANKA_1221800	null	-0.278451	conserved Plasmodium protein, unknown function	PbANKA_12_v3:834,714..837,446(+)
PBANKA_1220600	null	-0.278451	conserved Plasmodium protein, unknown function	PbANKA_12_v3:792,857..802,570(-)
PBANKA_1219800	null	-0.278451	Cg2 protein, putative	PbANKA_12_v3:756,772..764,028(-)
PBANKA_1219500	CRT	-0.278451	chloroquine resistance transporter, putative	PbANKA_12_v3:746,502..749,671(+)
PBANKA_1211400	null	-0.278451	zinc finger protein, putative	PbANKA_12_v3:420,067..422,221(+)
PBANKA_1203700	UPF1	-0.278451	regulator of nonsense transcripts 1, putative	PbANKA_12_v3:168,885..172,712(-)
PBANKA_1202000	IMC1c	-0.278451	inner membrane complex protein 1c	PbANKA_12_v3:107,010..107,846(+)
PBANKA_1201200	null	-0.278451	DnaJ protein, putative	PbANKA_12_v3:77,308..81,531(+)
PBANKA_1128300	null	-0.278451	amino acid transporter, putative	PbANKA_11_v3:1,058,904..1,060,838(-)
PBANKA_1125100	FabB/FabF	-0.278451	3-oxoacyl-acyl-carrier protein synthase, putative	PbANKA_11_v3:924,510..926,699(-)
PBANKA_1121700	null	-0.278451	leucine--tRNA ligase, putative	PbANKA_11_v3:799,609..803,358(+)
PBANKA_1114400	null	-0.278451	inositol polyphosphate multikinase, putative	PbANKA_11_v3:552,718..555,774(-)
PBANKA_1112900	null	-0.278451	conserved Plasmodium protein, unknown function	PbANKA_11_v3:504,454..511,228(+)
PBANKA_1108500	null	-0.278451	conserved Plasmodium protein, unknown function	PbANKA_11_v3:328,926..336,572(+)
PBANKA_1108000	null	-0.278451	conserved protein, unknown function	PbANKA_11_v3:307,850..309,718(+)
PBANKA_1104200	BCKDHB	-0.278451	2-oxoisovalerate dehydrogenase subunit beta, mitochondrial, putative	PbANKA_11_v3:170,432..171,550(+)
PBANKA_1104000	null	-0.278451	ATP-dependent helicase, putative	PbANKA_11_v3:165,137..167,260(+)
PBANKA_1013500	LSG1	-0.278451	large subunit GTPase 1, putative	PbANKA_10_v3:612,334..614,838(-)
PBANKA_1012600	null	-0.278451	conserved Plasmodium protein, unknown function	PbANKA_10_v3:579,768..584,561(+)
PBANKA_1012500	LRR5	-0.278451	leucine-rich repeat protein	PbANKA_10_v3:571,641..578,292(+)
PBANKA_1011700	null	-0.278451	conserved Plasmodium protein, unknown function	PbANKA_10_v3:548,790..551,624(+)
PBANKA_1010900	null	-0.278451	protein kinase, putative	PbANKA_10_v3:497,612..503,464(-)
PBANKA_1009600	null	-0.278451	conserved Plasmodium protein, unknown function	PbANKA_10_v3:443,488..445,035(-)
PBANKA_1009500	null	-0.278451	NAD(P)H-dependent glutamate synthase, putative	PbANKA_10_v3:433,633..442,521(+)
PBANKA_1007500	ALP5b	-0.278451	actin-like protein, putative	PbANKA_10_v3:353,552..355,639(-)
PBANKA_1006200	SIAP1	-0.278451	sporozoite invasion-associated protein 1	PbANKA_10_v3:308,463..311,462(+)
PBANKA_1006000	null	-0.278451	conserved Plasmodium protein, unknown function	PbANKA_10_v3:300,840..302,701(-)
PBANKA_1005700	null	-0.278451	conserved Plasmodium protein, unknown function	PbANKA_10_v3:291,639..294,860(+)
PBANKA_1005200	null	-0.278451	conserved Plasmodium protein, unknown function	PbANKA_10_v3:268,937..271,852(+)
PBANKA_1003600	ASP	-0.278451	apical sushi protein, putative	PbANKA_10_v3:219,228..221,793(-)
PBANKA_1002100	P36	-0.278451	6-cysteine protein	PbANKA_10_v3:137,743..138,801(-)
PBANKA_0920400	null	-0.278451	conserved Plasmodium protein, unknown function	PbANKA_09_v3:749,552..755,704(-)
PBANKA_0915300	null	-0.278451	conserved Plasmodium protein, unknown function	PbANKA_09_v3:585,333..588,509(-)
PBANKA_0913900	null	-0.278451	alpha/beta hydrolase, putative	PbANKA_09_v3:525,803..530,596(-)
PBANKA_0910200	PPM2	-0.278451	protein phosphatase PPM2	PbANKA_09_v3:376,850..379,213(-)
PBANKA_0902400	null	-0.278451	kinesin-like protein, putative	PbANKA_09_v3:92,559..95,806(+)
PBANKA_0902300	null	-0.278451	conserved Plasmodium protein, unknown function	PbANKA_09_v3:83,432..91,703(+)
PBANKA_0901500	null	-0.278451	conserved Plasmodium protein, unknown function	PbANKA_09_v3:40,156..42,443(+)
PBANKA_0831800	null	-0.278451	elongation factor Tu, putative	PbANKA_08_v3:1,213,689..1,216,079(-)
PBANKA_0829000	null	-0.278451	conserved Plasmodium protein, unknown function	PbANKA_08_v3:1,115,164..1,117,504(-)
PBANKA_0827300	null	-0.278451	conserved Plasmodium protein, unknown function	PbANKA_08_v3:1,057,206..1,061,576(-)
PBANKA_0822100	null	-0.278451	conserved Plasmodium protein, unknown function	PbANKA_08_v3:864,889..871,970(-)
PBANKA_0816500	null	-0.278451	conserved Plasmodium protein, unknown function	PbANKA_08_v3:680,408..682,471(+)
PBANKA_0814100	null	-0.278451	conserved Plasmodium protein, unknown function	PbANKA_08_v3:605,906..608,236(-)
PBANKA_0813400	null	-0.278451	alkaline phosphatase, putative	PbANKA_08_v3:589,058..590,542(-)
PBANKA_0809600	null	-0.278451	conserved Plasmodium protein, unknown function	PbANKA_08_v3:446,318..451,374(+)
PBANKA_0800700	null	-0.278451	conserved Plasmodium protein, unknown function	PbANKA_08_v3:36,744..41,738(+)
PBANKA_0719100	null	-0.278451	conserved Plasmodium protein, unknown function	PbANKA_07_v3:680,422..681,410(+)
PBANKA_0718300	MCM9	-0.278451	DNA helicase MCM9, putative	PbANKA_07_v3:655,881..659,525(-)
PBANKA_0712500	null	-0.278451	dynactin subunit 6, putative	PbANKA_07_v3:476,992..479,180(-)
PBANKA_0710100	KDH	-0.278451	2-oxoglutarate dehydrogenase E1 component, putative	PbANKA_07_v3:388,509..391,772(-)
PBANKA_0708500	null	-0.278451	phosphorylated CTD interacting factor 1 WW domain-containing protein, putative	PbANKA_07_v3:341,496..345,666(-)
PBANKA_0621600	null	-0.278451	conserved Plasmodium protein, unknown function	PbANKA_06_v3:861,848..864,078(-)
PBANKA_0620400	null	-0.278451	conserved Plasmodium protein, unknown function	PbANKA_06_v3:820,361..822,494(-)
PBANKA_0615900	CRMP2	-0.278451	cysteine repeat modular protein 2	PbANKA_06_v3:683,907..692,308(-)
PBANKA_0610100	LSD1	-0.278451	lysine-specific histone demethylase 1, putative	PbANKA_06_v3:453,269..461,709(+)
PBANKA_0605600	null	-0.278451	conserved Plasmodium protein, unknown function	PbANKA_06_v3:280,779..288,138(-)
PBANKA_0506000	SEA1	-0.278451	schizont egress antigen-1	PbANKA_05_v3:243,122..249,242(-)
PBANKA_0502100	null	-0.278451	conserved Plasmodium protein, unknown function	PbANKA_05_v3:77,693..80,763(-)
PBANKA_0418100	null	-0.278451	conserved Plasmodium protein, unknown function	PbANKA_04_v3:689,050..697,380(-)
PBANKA_0416500	CuTP	-0.278451	copper-transporting ATPase	PbANKA_04_v3:614,163..620,292(+)
PBANKA_0416000	RhopH3	-0.278451	high molecular weight rhoptry protein 3, putative	PbANKA_04_v3:574,017..577,578(+)
PBANKA_0415800	WDR66	-0.278451	WD repeat-containing protein 66, putative	PbANKA_04_v3:564,859..568,367(-)
PBANKA_0410400	GSK3	-0.278451	glycogen synthase kinase 3, putative	PbANKA_04_v3:379,254..381,512(-)
PBANKA_0403100	GLP1	-0.278451	1-cys-glutaredoxin-like protein-1, putative	PbANKA_04_v3:113,352..114,087(-)
PBANKA_0401100	SRPK1	-0.278451	serine/threonine protein kinase, putative	PbANKA_04_v3:34,262..38,182(+)
PBANKA_0305800	null	-0.278451	conserved Plasmodium protein, unknown function	PbANKA_03_v3:197,497..198,948(-)
PBANKA_0305400	null	-0.278451	conserved Plasmodium protein, unknown function	PbANKA_03_v3:183,881..188,383(+)
PBANKA_0301100	null	-0.278451	conserved Plasmodium protein, unknown function	PbANKA_03_v3:39,180..40,385(-)
PBANKA_0213400	NMD3	-0.278451	60S ribosomal export protein NMD3, putative	PbANKA_02_v3:497,780..500,251(-)
PBANKA_0206600	null	-0.278451	asparagine and aspartate rich protein 2, putative	PbANKA_02_v3:226,766..230,323(-)
PBANKA_0203100	PIP5K	-0.278451	phosphatidylinositol-4-phosphate 5-kinase, putative	PbANKA_02_v3:118,344..122,675(-)
PBANKA_0103500	null	-0.278451	RAP protein, putative	PbANKA_01_v3:157,943..162,247(-)
PBANKA_0102600	CEP76	-0.278451	centrosomal protein CEP76, putative	PbANKA_01_v3:113,956..121,877(-)
PBANKA_0101800	null	-0.278451	conserved Plasmodium protein, unknown function	PbANKA_01_v3:85,535..87,034(+)
PBANKA_1462200	PPM4	-0.298546	protein phosphatase PPM4	PbANKA_14_v3:2,348,439..2,350,819(+)
PBANKA_1438500	null	-0.298546	conserved Plasmodium protein, unknown function	PbANKA_14_v3:1,466,234..1,471,149(-)
PBANKA_1433800	null	-0.298546	conserved Plasmodium protein, unknown function	PbANKA_14_v3:1,256,941..1,263,363(-)
PBANKA_1427000	PPM7	-0.298546	protein phosphatase PPM7	PbANKA_14_v3:1,042,035..1,044,315(+)
PBANKA_1425900	null	-0.298546	conserved Plasmodium protein, unknown function	PbANKA_14_v3:994,424..998,423(+)
PBANKA_1411900	null	-0.298546	conserved Plasmodium protein, unknown function	PbANKA_14_v3:496,691..501,484(-)
PBANKA_1411500	null	-0.298546	conserved Plasmodium protein, unknown function	PbANKA_14_v3:480,790..489,391(+)
PBANKA_1408900	null	-0.298546	conserved Plasmodium protein, unknown function	PbANKA_14_v3:396,935..401,104(+)
PBANKA_1403800	null	-0.298546	conserved Plasmodium protein, unknown function	PbANKA_14_v3:213,136..223,402(-)
PBANKA_1401200	null	-0.298546	ATP-dependent RNA helicase DHR1, putative	PbANKA_14_v3:102,806..107,750(+)
PBANKA_1358700	null	-0.298546	conserved Plasmodium protein, unknown function	PbANKA_13_v3:2,235,535..2,238,486(+)
PBANKA_1333700	PDEdelta	-0.298546	phosphodiesterase delta	PbANKA_13_v3:1,354,705..1,357,756(+)
PBANKA_1331800	DER1-1	-0.298546	derlin-1, putative	PbANKA_13_v3:1,290,040..1,291,404(-)
PBANKA_1331200	null	-0.298546	rab GTPase activator, putative	PbANKA_13_v3:1,253,367..1,258,303(+)
PBANKA_1329800	AP2-SP	-0.298546	AP2 domain transcription factor AP2-SP	PbANKA_13_v3:1,211,715..1,214,546(-)
PBANKA_1329700	RPN2	-0.298546	26S proteasome regulatory subunit RPN2, putative	PbANKA_13_v3:1,206,349..1,210,225(+)
PBANKA_1319300	null	-0.298546	ferlin, putative	PbANKA_13_v3:792,790..798,483(-)
PBANKA_1312000	null	-0.298546	condensin-2 complex subunit G2, putative	PbANKA_13_v3:524,616..529,776(-)
PBANKA_1219900	null	-0.298546	Cg7 protein, putative	PbANKA_12_v3:765,313..768,847(-)
PBANKA_1218100	Cap380	-0.298546	oocyst capsule protein Cap380	PbANKA_12_v3:692,456..702,070(+)
PBANKA_1217100	null	-0.298546	protein kinase, putative	PbANKA_12_v3:653,986..655,393(-)
PBANKA_1214700	null	-0.298546	conserved Plasmodium protein, unknown function	PbANKA_12_v3:554,851..557,736(-)
PBANKA_1212700	null	-0.298546	conserved Plasmodium protein, unknown function	PbANKA_12_v3:480,039..486,365(+)
PBANKA_1212500	null	-0.298546	conserved Plasmodium protein, unknown function	PbANKA_12_v3:469,774..473,736(+)
PBANKA_1211900	PI-PLC	-0.298546	phosphoinositide-specific phospholipase C	PbANKA_12_v3:444,513..448,930(+)
PBANKA_1208200	null	-0.298546	kinesin-4, putative	PbANKA_12_v3:319,250..328,217(-)
PBANKA_1206300	UIS11	-0.298546	zinc finger protein, putative	PbANKA_12_v3:254,750..265,510(+)
PBANKA_1201400	null	-0.298546	conserved Plasmodium protein, unknown function	PbANKA_12_v3:86,248..89,343(+)
PBANKA_1200700	null	-0.298546	conserved Plasmodium protein, unknown function	PbANKA_12_v3:61,374..62,663(+)
PBANKA_1136900	PIAS	-0.298546	E3 SUMO-protein ligase PIAS, putative	PbANKA_11_v3:1,388,670..1,392,772(-)
PBANKA_1135300	null	-0.298546	conserved Plasmodium protein, unknown function	PbANKA_11_v3:1,319,663..1,328,824(-)
PBANKA_1134800	null	-0.298546	zinc finger protein, putative	PbANKA_11_v3:1,303,460..1,305,175(+)
PBANKA_1134500	null	-0.298546	conserved Plasmodium protein, unknown function	PbANKA_11_v3:1,294,277..1,298,850(+)
PBANKA_1132700	null	-0.298546	phosphatase 2A regulatory subunit-related protein, putative	PbANKA_11_v3:1,225,977..1,228,931(+)
PBANKA_1130700	null	-0.298546	conserved Plasmodium protein, unknown function	PbANKA_11_v3:1,157,144..1,158,142(-)
PBANKA_1115200	null	-0.298546	conserved Plasmodium protein, unknown function	PbANKA_11_v3:582,931..587,356(+)
PBANKA_1113400	PSOP12	-0.298546	secreted ookinete protein	PbANKA_11_v3:521,969..524,268(+)
PBANKA_1110800	null	-0.298546	MORN repeat protein, putative	PbANKA_11_v3:422,633..426,921(-)
PBANKA_1109200	null	-0.298546	asparagine--tRNA ligase, putative	PbANKA_11_v3:361,839..363,916(+)
PBANKA_1108700	SMC4	-0.298546	structural maintenance of chromosomes protein 4, putative	PbANKA_11_v3:341,006..345,334(+)
PBANKA_1008500	PTEX150	-0.298546	translocon component PTEX150	PbANKA_10_v3:387,704..390,463(-)
PBANKA_1008400	null	-0.298546	conserved Plasmodium protein, unknown function	PbANKA_10_v3:383,092..386,323(-)
PBANKA_1003300	null	-0.298546	conserved Plasmodium membrane protein, unknown function	PbANKA_10_v3:205,453..207,480(+)
PBANKA_1001300	null	-0.298546	conserved Plasmodium protein, unknown function	PbANKA_10_v3:93,404..95,906(-)
PBANKA_0913000	null	-0.298546	condensin-2 complex subunit D3, putative	PbANKA_09_v3:491,987..497,597(-)
PBANKA_0912600	null	-0.298546	conserved Plasmodium protein, unknown function	PbANKA_09_v3:473,402..483,432(-)
PBANKA_0901800	null	-0.298546	conserved Plasmodium protein, unknown function	PbANKA_09_v3:48,100..51,246(-)
PBANKA_0901600	null	-0.298546	protein farnesyltransferase subunit beta, putative	PbANKA_09_v3:43,138..46,182(+)
PBANKA_0828800	COX6B	-0.298546	cytochrome c oxidase subunit 6B, putative	PbANKA_08_v3:1,110,815..1,111,713(+)
PBANKA_0824900	null	-0.298546	patatin-like phospholipase, putative	PbANKA_08_v3:965,958..969,386(+)
PBANKA_0824800	null	-0.298546	RNA-binding protein, putative	PbANKA_08_v3:961,612..963,075(-)
PBANKA_0815300	null	-0.298546	met-10+ like protein, putative	PbANKA_08_v3:641,262..643,612(-)
PBANKA_0810700	SPM1	-0.298546	subpellicular microtubule protein 1, putative	PbANKA_08_v3:482,448..483,437(+)
PBANKA_0809000	null	-0.298546	translation initiation factor SUI1, putative	PbANKA_08_v3:429,783..432,519(+)
PBANKA_0807500	null	-0.298546	conserved Plasmodium protein, unknown function	PbANKA_08_v3:357,136..365,389(-)
PBANKA_0804400	null	-0.298546	conserved Plasmodium protein, unknown function	PbANKA_08_v3:230,335..235,764(-)
PBANKA_0803700	null	-0.298546	conserved Plasmodium protein, unknown function	PbANKA_08_v3:201,301..206,829(-)
PBANKA_0801200	null	-0.298546	erythrocyte membrane-associated antigen, putative	PbANKA_08_v3:55,896..62,009(+)
PBANKA_0722000	null	-0.298546	phosphatidylinositol 4-kinase, putative	PbANKA_07_v3:796,805..811,397(+)
PBANKA_0707700	null	-0.298546	conserved Plasmodium protein, unknown function	PbANKA_07_v3:320,619..324,059(+)
PBANKA_0702500	null	-0.298546	leucine--tRNA ligase, putative	PbANKA_07_v3:132,890..136,501(-)
PBANKA_0701200	null	-0.298546	conserved Plasmodium protein, unknown function	PbANKA_07_v3:86,937..94,418(+)
PBANKA_0617400	null	-0.298546	conserved Plasmodium protein, unknown function	PbANKA_06_v3:732,783..741,428(+)
PBANKA_0607700	KROX1	-0.298546	zinc finger transcription factor, putative	PbANKA_06_v3:372,978..376,724(-)
PBANKA_0506800	null	-0.298546	kelch domain-containing protein, putative	PbANKA_05_v3:288,595..291,228(+)
PBANKA_0504800	null	-0.298546	conserved Plasmodium protein, unknown function	PbANKA_05_v3:184,105..188,972(+)
PBANKA_0503500	null	-0.298546	zinc finger protein, putative	PbANKA_05_v3:134,198..138,970(-)
PBANKA_0502500	PPP8	-0.298546	serine/threonine protein phosphatase 8	PbANKA_05_v3:87,950..94,354(-)
PBANKA_0416200	null	-0.298546	mitochondrial carrier protein, putative	PbANKA_04_v3:598,563..601,838(+)
PBANKA_0414000	null	-0.298546	conserved Plasmodium protein, unknown function	PbANKA_04_v3:495,079..501,032(-)
PBANKA_0402100	null	-0.298546	spindle pole body protein, putative	PbANKA_04_v3:81,605..87,079(+)
PBANKA_0306100	P230	-0.298546	6-cysteine protein	PbANKA_03_v3:209,919..218,189(+)
PBANKA_0305200	null	-0.298546	conserved Plasmodium protein, unknown function	PbANKA_03_v3:175,108..181,666(+)
PBANKA_0304800	SERA4	-0.298546	serine repeat antigen 4	PbANKA_03_v3:153,928..157,135(-)
PBANKA_0212800	null	-0.298546	alpha/beta hydrolase, putative	PbANKA_02_v3:476,469..478,970(-)
PBANKA_0212200	null	-0.298546	conserved Plasmodium protein, unknown function	PbANKA_02_v3:445,464..460,922(-)
PBANKA_0211900	null	-0.298546	cation transporting ATPase, putative	PbANKA_02_v3:429,151..434,103(+)
PBANKA_0210600	null	-0.298546	ubiquitin carboxyl-terminal hydrolase, putative	PbANKA_02_v3:383,882..392,643(-)
PBANKA_0209900	NT4	-0.298546	nucleoside transporter 4, putative	PbANKA_02_v3:350,351..351,822(+)
PBANKA_0207700	null	-0.298546	conserved Plasmodium protein, unknown function	PbANKA_02_v3:270,966..274,970(+)
PBANKA_0205800	IK2	-0.298546	serine/threonine protein kinase, putative	PbANKA_02_v3:193,264..201,438(-)
PBANKA_0106300	null	-0.298546	conserved Plasmodium protein, unknown function	PbANKA_01_v3:258,200..264,727(+)
PBANKA_0102200	TEX1	-0.298546	trophozoite exported protein 1, putative	PbANKA_01_v3:96,818..99,523(-)
PBANKA_0305000	SERA2	-0.302673	serine repeat antigen 2	PbANKA_03_v3:163,296..167,127(-)
PBANKA_1464900	RON3	-0.312914	rhoptry neck protein 3, putative	PbANKA_14_v3:2,440,321..2,448,235(-)
PBANKA_1448700	null	-0.312914	bromodomain protein, putative	PbANKA_14_v3:1,878,841..1,888,284(+)
PBANKA_1443500	null	-0.312914	WD repeat-containing protein, putative	PbANKA_14_v3:1,659,517..1,666,929(-)
PBANKA_1437500	AP2-G	-0.312914	AP2 domain transcription factor AP2-G	PbANKA_14_v3:1,416,412..1,423,431(+)
PBANKA_1432800	MRD1	-0.312914	multiple RNA-binding domain-containing protein 1, putative	PbANKA_14_v3:1,229,908..1,232,901(+)
PBANKA_1432500	null	-0.312914	DNA-binding chaperone, putative	PbANKA_14_v3:1,222,104..1,224,692(+)
PBANKA_1417900	null	-0.312914	conserved Plasmodium protein, unknown function	PbANKA_14_v3:711,376..716,172(+)
PBANKA_1405400	SNRPA	-0.312914	U1 small nuclear ribonucleoprotein A, putative	PbANKA_14_v3:271,020..272,695(+)
PBANKA_1402000	null	-0.312914	sodium/hydrogen exchanger, Na+, H+ antiporter, putative	PbANKA_14_v3:125,960..131,247(-)
PBANKA_1356400	RAD5	-0.312914	DNA repair protein RAD5, putative	PbANKA_13_v3:2,130,499..2,135,067(+)
PBANKA_1332600	null	-0.312914	conserved Plasmodium protein, unknown function	PbANKA_13_v3:1,316,699..1,318,807(-)
PBANKA_1317100	null	-0.312914	conserved Plasmodium protein, unknown function	PbANKA_13_v3:716,243..721,960(+)
PBANKA_1228100	ApiAP2	-0.312914	AP2 domain transcription factor, putative	PbANKA_12_v3:1,076,110..1,082,238(+)
PBANKA_1219000	null	-0.312914	heat shock protein 90, putative	PbANKA_12_v3:731,056..733,413(-)
PBANKA_1213000	ADA2	-0.312914	transcriptional coactivator ADA2, putative	PbANKA_12_v3:493,850..500,998(-)
PBANKA_1212900	null	-0.312914	conserved Plasmodium protein, unknown function	PbANKA_12_v3:489,254..493,198(+)
PBANKA_1202600	null	-0.312914	E3 ubiquitin-protein ligase, putative	PbANKA_12_v3:135,230..138,163(-)
PBANKA_1202500	null	-0.312914	WD repeat-containing protein, putative	PbANKA_12_v3:125,063..132,876(-)
PBANKA_1201800	null	-0.312914	conserved Plasmodium protein, unknown function	PbANKA_12_v3:96,857..102,004(-)
PBANKA_1200900	null	-0.312914	conserved Plasmodium protein, unknown function	PbANKA_12_v3:67,748..68,994(-)
PBANKA_1136100	null	-0.312914	conserved Plasmodium protein, unknown function	PbANKA_11_v3:1,360,268..1,365,577(+)
PBANKA_1122000	NAB2	-0.312914	nuclear polyadenylated RNA-binding protein NAB2, putative	PbANKA_11_v3:818,206..822,286(-)
PBANKA_1118500	null	-0.312914	conserved Plasmodium protein, unknown function	PbANKA_11_v3:690,734..701,018(-)
PBANKA_1109700	null	-0.312914	conserved Plasmodium protein, unknown function	PbANKA_11_v3:379,560..385,352(-)
PBANKA_1107400	null	-0.312914	conserved Plasmodium protein, unknown function	PbANKA_11_v3:288,715..291,873(+)
PBANKA_1005400	null	-0.312914	conserved Plasmodium protein, unknown function	PbANKA_10_v3:280,212..285,029(+)
PBANKA_1005300	null	-0.312914	conserved Plasmodium protein, unknown function	PbANKA_10_v3:272,882..278,149(-)
PBANKA_1004100	null	-0.312914	NYN domain-containing protein, putative	PbANKA_10_v3:234,990..237,411(-)
PBANKA_0831500	null	-0.312914	conserved Plasmodium protein, unknown function	PbANKA_08_v3:1,192,004..1,204,837(+)
PBANKA_0827400	null	-0.312914	conserved Plasmodium protein, unknown function	PbANKA_08_v3:1,064,586..1,068,833(+)
PBANKA_0826900	null	-0.312914	protein kinase, putative	PbANKA_08_v3:1,033,522..1,042,317(-)
PBANKA_0811400	null	-0.312914	conserved Plasmodium protein, unknown function	PbANKA_08_v3:512,546..519,931(+)
PBANKA_0802300	null	-0.312914	E3 ubiquitin-protein ligase, putative	PbANKA_08_v3:129,533..141,175(-)
PBANKA_0800500	CHT1	-0.312914	chitinase	PbANKA_08_v3:29,721..31,667(+)
PBANKA_0719200	PUF2	-0.312914	mRNA-binding protein PUF2	PbANKA_07_v3:682,064..683,931(-)
PBANKA_0714500	null	-0.312914	conserved Plasmodium protein, unknown function	PbANKA_07_v3:545,989..549,369(+)
PBANKA_0704500	null	-0.312914	E3 ubiquitin-protein ligase, putative	PbANKA_07_v3:204,107..226,549(+)
PBANKA_0613100	null	-0.312914	conserved Plasmodium protein, unknown function	PbANKA_06_v3:557,112..569,102(-)
PBANKA_0606700	CRMP3	-0.312914	cysteine repeat modular protein 3	PbANKA_06_v3:326,737..337,411(+)
PBANKA_0417100	null	-0.312914	conserved protein, unknown function	PbANKA_04_v3:636,392..644,664(+)
PBANKA_0416300	NUP100	-0.312914	nucleoporin NUP100/NSP100, putative	PbANKA_04_v3:604,336..610,648(+)
PBANKA_0404000	null	-0.312914	conserved Plasmodium protein, unknown function	PbANKA_04_v3:149,758..159,693(-)
PBANKA_0403600	null	-0.312914	conserved Plasmodium protein, unknown function	PbANKA_04_v3:127,356..137,946(-)
PBANKA_0401000	PRP46	-0.312914	pre-mRNA-splicing factor PRP46, putative	PbANKA_04_v3:28,106..30,106(-)
PBANKA_0304700	SERA5	-0.312914	serine repeat antigen 5	PbANKA_03_v3:149,412..152,465(-)
PBANKA_0303600	RPN1	-0.312914	26S proteasome regulatory subunit RPN1, putative	PbANKA_03_v3:107,784..111,220(+)
PBANKA_0302500	HT	-0.312914	hexose transporter	PbANKA_03_v3:80,750..82,267(-)
PBANKA_0212700	null	-0.312914	RING zinc finger protein, putative	PbANKA_02_v3:469,835..475,726(+)
PBANKA_0210500	null	-0.312914	conserved Plasmodium protein, unknown function	PbANKA_02_v3:369,489..382,514(-)
PBANKA_0208800	UBP1	-0.312914	ubiquitin carboxyl-terminal hydrolase 1, putative	PbANKA_02_v3:299,759..308,804(-)
PBANKA_0110500	LRR6	-0.312914	leucine-rich repeat protein	PbANKA_01_v3:417,832..424,673(-)
PBANKA_0104400	null	-0.312914	nucleoside diphosphate kinase, putative	PbANKA_01_v3:179,179..185,103(-)
PBANKA_1438400	null	-0.323731	conserved Plasmodium protein, unknown function	PbANKA_14_v3:1,452,049..1,464,962(-)
PBANKA_1357600	null	-0.323731	conserved Plasmodium protein, unknown function	PbANKA_13_v3:2,195,952..2,199,455(-)
PBANKA_1334000	null	-0.323731	conserved Plasmodium protein, unknown function	PbANKA_13_v3:1,363,481..1,366,922(-)
PBANKA_1316900	null	-0.323731	conserved Plasmodium protein, unknown function	PbANKA_13_v3:707,880..714,781(+)
PBANKA_1226100	null	-0.323731	conserved Plasmodium protein, unknown function	PbANKA_12_v3:987,557..1,003,662(-)
PBANKA_1220800	null	-0.323731	conserved Plasmodium protein, unknown function	PbANKA_12_v3:807,218..812,803(+)
PBANKA_1219600	null	-0.323731	cg1 protein, putative	PbANKA_12_v3:751,575..754,688(+)
PBANKA_1213300	null	-0.323731	conserved Plasmodium protein, unknown function	PbANKA_12_v3:512,199..517,865(-)
PBANKA_1128800	null	-0.323731	CPW-WPC family protein	PbANKA_11_v3:1,091,625..1,093,582(-)
PBANKA_1003200	null	-0.323731	conserved Plasmodium protein, unknown function	PbANKA_10_v3:203,579..204,524(-)
PBANKA_1003100	PRPF8	-0.323731	pre-mRNA-processing-splicing factor 8, putative	PbANKA_10_v3:193,714..202,860(+)
PBANKA_1003000	LISP2	-0.323731	liver specific protein 2	PbANKA_10_v3:183,231..190,310(-)
PBANKA_0915000	AMA1	-0.323731	apical membrane antigen 1	PbANKA_09_v3:573,540..575,210(-)
PBANKA_0812400	CRMP1	-0.323731	cysteine repeat modular protein 1	PbANKA_08_v3:550,290..559,914(+)
PBANKA_0720100	null	-0.323731	conserved Plasmodium protein, unknown function	PbANKA_07_v3:724,590..738,790(+)
PBANKA_0713100	RON5	-0.323731	rhoptry neck protein 5, putative	PbANKA_07_v3:496,794..503,841(+)
PBANKA_0416100	null	-0.323731	dynein heavy chain, putative	PbANKA_04_v3:578,979..596,483(+)
PBANKA_0408300	null	-0.323731	phd finger protein, putative	PbANKA_04_v3:300,183..310,724(+)
PBANKA_0110100	null	-0.323731	conserved Plasmodium protein, unknown function	PbANKA_01_v3:400,224..408,553(-)
PBANKA_0103300	null	-0.323731	conserved Plasmodium protein, unknown function	PbANKA_01_v3:148,463..155,002(+)
PBANKA_0101400	null	-0.323731	conserved Plasmodium protein, unknown function	PbANKA_01_v3:70,637..75,081(-)
PBANKA_1454200	null	-0.332183	conserved Plasmodium protein, unknown function	PbANKA_14_v3:2,085,185..2,102,380(+)
PBANKA_1332700	null	-0.332183	duffy-binding protein	PbANKA_13_v3:1,320,718..1,323,865(+)
PBANKA_1201100	null	-0.332183	conserved Plasmodium protein, unknown function	PbANKA_12_v3:73,439..76,177(+)
PBANKA_1137300	null	-0.332183	conserved Plasmodium protein, unknown function	PbANKA_11_v3:1,411,084..1,417,007(+)
PBANKA_1127900	null	-0.332183	RAP protein, putative	PbANKA_11_v3:1,044,932..1,049,066(+)
PBANKA_1125900	null	-0.332183	ankyrin-repeat protein, putative	PbANKA_11_v3:948,888..954,224(+)
PBANKA_1108100	null	-0.332183	guanidine nucleotide exchange factor, putative	PbANKA_11_v3:310,105..317,082(-)
PBANKA_1001000	null	-0.332183	conserved Plasmodium protein, unknown function	PbANKA_10_v3:75,379..85,747(+)
PBANKA_0912400	null	-0.332183	conserved Plasmodium protein, unknown function	PbANKA_09_v3:467,772..470,299(+)
PBANKA_0910700	null	-0.332183	conserved Plasmodium protein, unknown function	PbANKA_09_v3:399,878..407,749(-)
PBANKA_0806700	null	-0.332183	conserved Plasmodium protein, unknown function	PbANKA_08_v3:314,297..328,273(-)
PBANKA_0506100	null	-0.332183	PHAX domain-containing protein, putative	PbANKA_05_v3:251,165..256,213(-)
PBANKA_0401700	null	-0.332183	conserved Plasmodium protein, unknown function	PbANKA_04_v3:62,664..66,626(-)
PBANKA_0213200	null	-0.332183	conserved Plasmodium protein, unknown function	PbANKA_02_v3:487,985..495,028(+)
PBANKA_1434600	null	-0.338975	formin 2, putative	PbANKA_14_v3:1,292,289..1,300,325(+)
PBANKA_1415700	ApiAP2	-0.338975	AP2 domain transcription factor, putative	PbANKA_14_v3:635,549..643,012(+)
PBANKA_1357900	null	-0.338975	conserved Plasmodium protein, unknown function	PbANKA_13_v3:2,210,482..2,212,833(+)
PBANKA_1331400	null	-0.338975	conserved Plasmodium protein, unknown function	PbANKA_13_v3:1,267,906..1,275,777(-)
PBANKA_1316300	null	-0.338975	conserved Plasmodium protein, unknown function	PbANKA_13_v3:684,847..695,374(+)
PBANKA_1315700	RON2	-0.338975	rhoptry neck protein 2	PbANKA_13_v3:664,125..670,370(+)
PBANKA_1230100	null	-0.338975	ribonuclease, putative	PbANKA_12_v3:1,160,093..1,169,250(-)
PBANKA_1212000	null	-0.338975	conserved Plasmodium protein, unknown function	PbANKA_12_v3:450,736..457,137(+)
PBANKA_1136700	GCbeta	-0.338975	guanylyl cyclase beta	PbANKA_11_v3:1,376,352..1,387,510(+)
PBANKA_1008600	null	-0.338975	conserved Plasmodium protein, unknown function	PbANKA_10_v3:394,229..399,484(+)
PBANKA_1003400	UIS14	-0.338975	lysine decarboxylase, putative	PbANKA_10_v3:208,170..214,958(-)
PBANKA_1002300	null	-0.338975	conserved Plasmodium protein, unknown function	PbANKA_10_v3:146,703..158,627(+)
PBANKA_1000011	null	-0.338975	reticulocyte binding protein, putative	PbANKA_10_v3:1,847..10,268(+)
PBANKA_0902100	SLARP	-0.338975	sporozoite and liver stage asparagine-rich protein	PbANKA_09_v3:69,123..79,055(+)
PBANKA_0604500	HMGB3	-0.338975	high mobility group protein B3, putative	PbANKA_06_v3:229,909..237,120(+)
PBANKA_0406200	null	-0.338975	conserved Plasmodium protein, unknown function	PbANKA_04_v3:219,037..230,225(-)
PBANKA_0214300	null	-0.338975	AP-4 complex subunit beta, putative	PbANKA_02_v3:534,570..537,816(-)
PBANKA_0112100	ApiAP2	-0.338975	AP2 domain transcription factor, putative	PbANKA_01_v3:465,529..473,341(+)
PBANKA_0100900	null	-0.338975	ATP-dependent RNA helicase, putative	PbANKA_01_v3:56,253..60,273(+)
PBANKA_1459400	null	-0.344555	conserved Plasmodium protein, unknown function	PbANKA_14_v3:2,271,177..2,275,047(+)
PBANKA_1359700	P47	-0.344555	6-cysteine protein	PbANKA_13_v3:2,278,263..2,279,558(-)
PBANKA_1228300	null	-0.344555	conserved Plasmodium protein, unknown function	PbANKA_12_v3:1,088,671..1,101,798(-)
PBANKA_0802000	null	-0.344555	conserved Plasmodium protein, unknown function	PbANKA_08_v3:113,003..119,143(+)
PBANKA_0801600	null	-0.344555	conserved Plasmodium protein, unknown function	PbANKA_08_v3:71,892..83,822(-)
PBANKA_0622200	null	-0.344555	conserved Plasmodium protein, unknown function	PbANKA_06_v3:882,387..892,432(-)
PBANKA_0507300	null	-0.344555	dynein heavy chain, putative	PbANKA_05_v3:302,326..318,255(-)
PBANKA_1135900	null	-0.349224	conserved Plasmodium protein, unknown function	PbANKA_11_v3:1,347,948..1,357,499(+)
PBANKA_1010300	null	-0.349224	dynein-related AAA-type ATPase, putative	PbANKA_10_v3:461,674..483,465(+)
PBANKA_1001800	AP2-SP2	-0.349224	AP2 domain transcription factor AP2-SP2	PbANKA_10_v3:118,908..129,336(-)
PBANKA_0601600	null	-0.349224	conserved protein, unknown function	PbANKA_06_v3:137,741..143,773(-)
PBANKA_0305100	SERA1	-0.353188	serine repeat antigen 1	PbANKA_03_v3:168,669..173,334(-)
PBANKA_1356800	null	-0.359559	conserved Plasmodium protein, unknown function	PbANKA_13_v3:2,144,956..2,166,336(-)
PBANKA_1402300	null	-0.362158	conserved Plasmodium protein, unknown function	PbANKA_14_v3:138,737..163,465(-)
PBANKA_1200800	null	-0.362158	RNA-binding protein, putative	PbANKA_12_v3:64,897..67,272(+)
PBANKA_0601000	null	-0.364457	ATP dependent RNA helicase, putative	PbANKA_06_v3:100,982..104,963(-)
PBANKA_0601200	null	-0.366505	dynein heavy chain, putative	PbANKA_06_v3:109,744..131,276(+)
PBANKA_0831000	MSP1	-0.368341	merozoite surface protein 1	PbANKA_08_v3:1,170,535..1,175,910(+)
PBANKA_1128500	null	-0.369996	SET domain protein, putative	PbANKA_11_v3:1,064,715..1,083,954(+)
