# Supplementary material for: The Plasmodium berghei RC strain is highly diverged and harbors putatively novel drug resistance variants
Source: PeerJ. 2017 Oct 5;5:e3766. doi: 10.7717/peerj.3766 (PMC5632537; doi:10.7717/peerj.3766)
Supplement: Supplemental Information 4 — The locations of CNV called using the cn.MOPS tool are listed according to the PbANKA v3 reference. Copy numbers for each strain are indicated in separate columns. [file peerj-05-3766-s004.xlsx]

## Sheet: Sheet1
Chromosome	start	end	CNV width (bp)	PbK173	PbNK65_E	PbNK65_NY	PbSP11_A	PbSP11_RLL	PbRC
berg00	13501	15500	2000	CN0	CN2	CN0	CN2	CN2	CN2
berg00	23001	32000	9000	CN2	CN2	CN0	CN2	CN0	CN0
berg00	35001	37000	2000	CN0	CN2	CN2	CN2	CN2	CN2
berg00	57001	79500	22500	CN2	CN2	CN2	CN3	CN2	CN2
berg00	127501	132383	4883	CN2	CN2	CN2	CN3	CN2	CN0
berg01	3001	4500	1500	CN2	CN2	CN3	CN2	CN3	CN2
berg01	503501	515658	12158	CN3	CN2	CN2	CN3	CN2	CN2
berg02	1	26000	26000	CN0	CN1	CN3	CN1	CN1	CN2
berg02	553501	571500	18000	CN0	CN1	CN2	CN1	CN2	CN2
berg02	573001	577500	4500	CN0	CN2	CN2	CN2	CN2	CN2
berg02	579001	583500	4500	CN0	CN4	CN2	CN4	CN3	CN2
berg02	584501	587500	3000	CN0	CN2	CN2	CN2	CN2	CN2
berg02	589501	591000	1500	CN2	CN3	CN2	CN2	CN2	CN2
berg02	596001	597500	1500	CN2	CN2	CN2	CN2	CN3	CN2
berg02	611501	622507	11007	CN0	CN2	CN2	CN2	CN2	CN0
berg03	1	4000	4000	CN2	CN2	CN2	CN2	CN2	CN0
berg03	203501	205000	1500	CN2	CN0	CN2	CN2	CN2	CN2
berg03	598501	604000	5500	CN3	CN2	CN2	CN2	CN2	CN0
berg03	606501	608000	1500	CN2	CN1	CN2	CN1	CN2	CN2
berg03	612501	615500	3000	CN1	CN2	CN2	CN2	CN2	CN2
berg03	618001	659511	41511	CN3	CN3	CN3	CN2	CN0	CN0
berg04	1	2500	2500	CN2	CN2	CN2	CN2	CN2	CN0
berg04	3001	5500	2500	CN2	CN2	CN2	CN2	CN2	CN0
berg05	4001	9500	5500	CN2	CN3	CN2	CN3	CN3	CN1
berg05	17001	29000	12000	CN0	CN2	CN2	CN3	CN3	CN0
berg05	38001	39500	1500	CN2	CN2	CN2	CN2	CN1	CN2
berg05	891501	916500	25000	CN0	CN2	CN2	CN2	CN2	CN2
berg05	924501	926500	2000	CN2	CN2	CN2	CN2	CN0	CN2
berg05	928001	929500	1500	CN2	CN2	CN2	CN2	CN2	CN0
berg06	1	14000	14000	CN2	CN3	CN3	CN3	CN2	CN0
berg06	16501	18000	1500	CN2	CN2	CN3	CN2	CN2	CN2
berg06	40501	47000	6500	CN2	CN2	CN2	CN2	CN0	CN2
berg06	48501	76500	28000	CN3	CN3	CN3	CN3	CN0	CN0
berg06	77001	81500	4500	CN3	CN1	CN2	CN2	CN2	CN0
berg06	975501	984265	8765	CN2	CN3	CN3	CN3	CN2	CN0
berg07	1	18000	18000	CN0	CN3	CN4	CN4	CN2	CN1
berg07	20001	32500	12500	CN2	CN1	CN1	CN3	CN0	CN0
berg07	33501	43500	10000	CN1	CN1	CN1	CN1	CN0	CN0
berg07	44501	62000	17500	CN2	CN2	CN1	CN3	CN0	CN0
berg07	70001	91500	21500	CN2	CN2	CN2	CN2	CN0	CN2
berg07	824501	829500	5000	CN2	CN2	CN3	CN2	CN2	CN2
berg07	843501	846619	3119	CN2	CN3	CN3	CN3	CN2	CN2
berg08	1	2500	2500	CN2	CN3	CN2	CN3	CN3	CN2
berg08	5001	7500	2500	CN2	CN3	CN2	CN2	CN3	CN0
berg08	1352501	1384500	32000	CN0	CN3	CN3	CN3	CN3	CN0
berg08	1386501	1390500	4000	CN2	CN1	CN2	CN1	CN1	CN2
berg08	1393001	1420536	27536	CN0	CN1	CN0	CN1	CN3	CN0
berg09	1	6000	6000	CN2	CN2	CN2	CN2	CN0	CN1
berg09	9501	11000	1500	CN1	CN2	CN0	CN2	CN2	CN2
berg09	13001	15500	2500	CN2	CN3	CN2	CN3	CN3	CN2
berg09	16501	18000	1500	CN3	CN2	CN2	CN2	CN2	CN2
berg09	1594501	1608000	13500	CN3	CN3	CN2	CN3	CN1	CN0
berg09	1608501	1633585	25085	CN0	CN1	CN0	CN1	CN5	CN3
berg10	1	8000	8000	CN1	CN3	CN2	CN3	CN0	CN4
berg10	14501	20000	5500	CN4	CN3	CN3	CN3	CN3	CN1
berg10	26501	28000	1500	CN2	CN1	CN1	CN2	CN2	CN2
berg10	29001	32000	3000	CN2	CN2	CN2	CN3	CN3	CN0
berg10	44501	46500	2000	CN2	CN2	CN2	CN2	CN4	CN5
berg10	1600501	1626500	26000	CN0	CN3	CN3	CN3	CN3	CN3
berg10	1628501	1630000	1500	CN2	CN3	CN3	CN3	CN2	CN2
berg10	1631001	1632500	1500	CN2	CN2	CN2	CN2	CN2	CN1
berg10	1637001	1640192	3192	CN2	CN2	CN2	CN1	CN2	CN6
berg11	1	25000	25000	CN2	CN3	CN5	CN8	CN3	CN0
berg11	32501	34000	1500	CN2	CN2	CN2	CN2	CN3	CN2
berg11	37001	42500	5500	CN2	CN2	CN2	CN2	CN2	CN0
berg11	1720501	1722000	1500	CN3	CN2	CN2	CN2	CN2	CN2
berg11	1733001	1750000	17000	CN3	CN3	CN3	CN2	CN3	CN0
berg11	1750501	1752000	1500	CN2	CN3	CN3	CN2	CN2	CN2
berg11	1756001	1761000	5000	CN1	CN2	CN3	CN2	CN3	CN3
berg12	1	9500	9500	CN2	CN3	CN3	CN3	CN2	CN2
berg12	10001	18500	8500	CN2	CN3	CN3	CN3	CN3	CN3
berg12	20501	22000	1500	CN2	CN2	CN3	CN2	CN2	CN2
berg12	23001	34000	11000	CN0	CN3	CN3	CN3	CN0	CN0
berg12	35001	37000	2000	CN2	CN3	CN3	CN3	CN2	CN2
berg12	38001	48000	10000	CN0	CN2	CN2	CN2	CN2	CN2
berg12	51501	54000	2500	CN0	CN3	CN3	CN3	CN2	CN2
berg12	1752501	1767000	14500	CN2	CN2	CN2	CN3	CN2	CN2
berg12	1768001	1802500	34500	CN0	CN3	CN3	CN3	CN3	CN4
berg12	1803501	1807261	3761	CN2	CN2	CN1	CN1	CN2	CN1
berg13	1	23500	23500	CN1	CN3	CN3	CN3	CN3	CN3
berg13	25001	28000	3000	CN1	CN2	CN1	CN2	CN1	CN0
berg13	32001	33500	1500	CN3	CN2	CN2	CN2	CN2	CN2
berg13	38001	41000	3000	CN2	CN2	CN0	CN2	CN2	CN2
berg14	1	5000	5000	CN2	CN3	CN1	CN1	CN2	CN2
berg14	7001	18000	11000	CN2	CN3	CN3	CN3	CN2	CN3
berg14	20001	37500	17500	CN2	CN3	CN3	CN3	CN0	CN3
berg14	40001	44000	4000	CN4	CN2	CN3	CN2	CN0	CN0
berg14	45501	55500	10000	CN3	CN2	CN2	CN2	CN3	CN0
berg14	2473001	2475500	2500	CN2	CN2	CN2	CN2	CN2	CN3
berg14	2479501	2481000	1500	CN2	CN2	CN2	CN2	CN2	CN3
berg14	2496001	2498000	2000	CN2	CN2	CN2	CN2	CN2	CN3
berg14	2499001	2501000	2000	CN2	CN2	CN2	CN2	CN2	CN3
berg14	2502501	2504000	1500	CN2	CN2	CN1	CN2	CN2	CN2
berg14	2508501	2511500	3000	CN2	CN3	CN3	CN1	CN2	CN2
berg14	2512501	2516500	4000	CN2	CN2	CN2	CN2	CN2	CN0
berg14	2519501	2533500	14000	CN2	CN3	CN3	CN3	CN2	CN2
berg14	2537001	2544500	7500	CN0	CN3	CN3	CN3	CN2	CN0
berg14	2548001	2549702	1702	CN2	CN2	CN2	CN2	CN2	CN1
